# Supplementary material for: InCl3-catalyzed intramolecular carbonyl–olefin metathesis
Source: Royal Society of Chemistry journal article supplement (doi:10.1039/d3ob01170d), 2023-01-01
Supplement: d3ob01170d1.pdf [file d3ob01170d1.pdf]

## Supplementary Information

### InCl<sub>3</sub>-Catalyzed Intramolecular Carbonyl–Olefin Metathesis

Marianela G. Pizzio, Zoe B. Cenizo, Luciana Méndez, Ariel M. Sarotti and Ernesto G.

Mata\*

Instituto de Química Rosario (CONICET – UNR), Facultad de Ciencias Bioquímicas y

Farmacéuticas, UNR, Suipacha 531, 2000 Rosario.

E-mail: [mata@iquir-conicet.gov.ar](mailto:mata@iquir-conicet.gov.ar)

## *Table of Contents*

|                                                                                                    |      |
|----------------------------------------------------------------------------------------------------|------|
| 1. General Information.....                                                                        | S3   |
| 2. Preparation of Starting Materials                                                               |      |
| 2.1. General Procedure for the Synthesis of Starting Materials <b>1a-l</b> .....                   | S4   |
| 2.1.1. General Procedure to Prepare 1,3-Diketones <b>9a-l</b> .....                                | S4   |
| 2.1.2. Synthesis of 5-bromo-2-methylpent-2-ene ( <b>11</b> ).....                                  | S10  |
| 2.1.3. General Alkylation Procedure for the Synthesis of Compounds <b>1a-l</b> .....               | S10  |
| 2.2. General Procedure for the Synthesis of Starting Materials <b>5a-e</b> .....                   | S18  |
| 2.2.1. Synthesis of diethyl 2-(3-methylbut-2-en-1-yl)malonate ( <b>14</b> ).....                   | S18  |
| 2.2.2. General Alkylation Procedure for the Synthesis of Compounds <b>5a-e</b> .....               | S18  |
| 2.3. General Procedure for the Synthesis of Starting Material <b>5f</b> .....                      | S22  |
| 3. In(III)-catalyzed metathesis/hydroarylation by-reaction from malonates <b>5a-c</b> .....        | S24  |
| 4. <i>In Situ</i> <sup>1</sup> H-NMR Experiment for Intramolecular Carbonyl-Olefin Metathesis..... | S26  |
| 5. Computational Details.....                                                                      | S28  |
| 6. <sup>1</sup> H NMR and <sup>13</sup> C NMR.....                                                 | S54  |
| 7. Unambiguous assignment of isomers <b>2</b> and <b>3</b> (exemplified by <b>2g/3g</b> ).....     | S100 |
| 8. References.....                                                                                 | S101 |

## 1. General Information

**General Laboratory Procedures:** Unless the preparation procedure is indicated, the compounds used were obtained from commercial sources and used without further purification. Potassium  $\alpha$ -oxocarboxylates were obtained by the reaction of the corresponding  $\alpha$ -oxocarboxylic acids with potassium *tert*-butoxide in ethanol.<sup>1</sup>  $\alpha$ -Bromoacetophenones **8c**, **8f**, **8h** and **8i** were obtained by bromination with *N*-bromosuccinimide and *p*-toluenesulfonic acid from the corresponding acetophenones. Solvents used as eluents in chromatographic techniques (TLC or column chromatography) were purified by distillation.

### Instruments and conditions:

**Nuclear Magnetic Resonance:** NMR spectra were recorded with Bruker spectrometer brand model Avance-300 DPX at 300 MHz for <sup>1</sup>H NMR (using the Me<sub>4</sub>Si signal as internal reference standard,  $\delta = 0.00$  ppm) and at 75 MHz for <sup>13</sup>C NMR (using the solvent signal as internal reference standard). Measurements were made with sample dissolved in CDCl<sub>3</sub>. <sup>1</sup>H NMR spectra are informed indicating the chemical shifts of the signals ( $\delta$ ) and then, in parentheses, the multiplicity of the signal, the coupling constants (*J*) and integration. The <sup>13</sup>C NMR spectra are reported indicating the chemical shifts of the signals. Abbreviations used to indicate the multiplicities of the signals are s: singlet; brs: broad singlet; d: doublet; dd: doublet of doublets; td: triplet of doublets; dt: doublet of triplets; t: triplet; sept: septet and m: multiplet.

**Mass Spectrometry:** HRMS spectra were performed at the Unit of Microanalysis and Physical Methods Applied to Organic Chemistry (UMYMFOR-UBA), using a Bruker

mass spectrometer micrOTOF-Q II. The detection of ions was carried out by electrospray ionization (ESI), positive mode.

**Chromatography:** TLCs were performed on commercial aluminum plates covered with Merck silica gel (60 F<sub>254</sub>). Chromatographic plates were analyzed by UV radiation (254 nm) and/or spraying with irreversible development methods. Preparative separations were carried out by liquid column chromatography using Merck 60 H silica gel (70-230 mesh and 230-400 mesh).

**Microwave:** Microwave reactions were carried out in 10 mL microwave vials on Biotage® Initiator+ Microwave or 10 mL vials on Discover 2.0 Microwave Synthesizer.

## 2. Preparation of Starting Materials

### 2.1. General Procedure for the Synthesis of Starting Materials 1a-l

#### 2.1.1. General Procedure to Prepare 1,3-Diketones 9a-l<sup>2</sup>

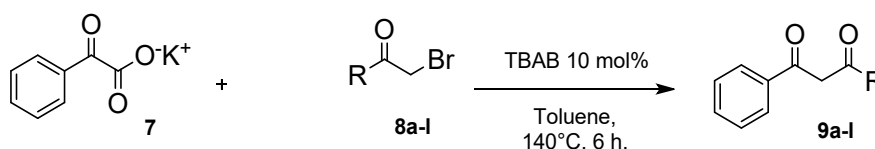

A flame-dried schlenk tube with a magnetic stirring bar was charged with potassium  $\alpha$ -oxocarboxylate **7** (1 equiv.),  $\alpha$ -bromoketone **8a-l** (1 equiv.), 10 mol% TBAB and toluene (0.25 M). The reaction was stirred at 140 °C for 6 h under N<sub>2</sub> atmosphere. After cooled down to room temperature, the mixture was diluted with 15 mL of CH<sub>2</sub>Cl<sub>2</sub>, filtered through a celite pad. The solvent was then evaporated and the residue was purified by column chromatography using hexane/EtOAc as the eluent to provide the corresponding 1,3-diketone **9a-l**.

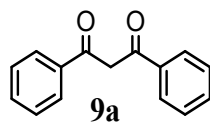

**1,3-diphenylpropane-1,3-dione (9a).**<sup>1</sup> General procedure to prepare 1,3-diketones was followed employing 2-bromoacetophenone (**8a**) (99.5 mg, 0.5 mmol) and compound **7** (94 mg, 0.5 mmol) in 2 mL of toluene. Purification by column chromatography eluting with hexane/EtOAc (95:5) provided **9a** with 56% yield (63 mg), as a white solid. <sup>1</sup>H NMR (300 MHz, CDCl<sub>3</sub>) δ 8.06 – 7.89 (m, 4H), 7.62 – 7.35 (m, 6H), 6.86 (s, 1H). <sup>13</sup>C NMR (75 MHz, CDCl<sub>3</sub>) δ 185.8, 135.6, 132.5, 128.7, 127.2, 93.2.

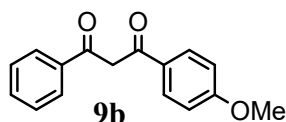

**1-(4-methoxyphenyl)-3-phenylpropane-1,3-dione (9b).**<sup>1</sup> General procedure to prepare 1,3-diketones was followed employing 2-bromo-4'-methoxyacetophenone (**8b**) (183 mg, 0.8 mmol) and compound **7** (150 mg, 0.8 mmol) in 3.2 mL of toluene. Purification by column chromatography eluting with hexane/EtOAc (95:5) provided **9b** with 50% yield (101.6 mg), as a white solid. <sup>1</sup>H NMR (300 MHz, CDCl<sub>3</sub>) δ 8.05 – 7.90 (m, 4H), 7.60 – 7.40 (m, 3H), 6.97 (d, *J* = 9.0 Hz, 2H), 6.79 (s, 1H), 3.96 – 3.73 (m, 3H). <sup>13</sup>C NMR (75 MHz, CDCl<sub>3</sub>) δ 186.2, 184.0, 163.3, 135.6, 132.2, 129.3, 128.6, 128.2, 127.0, 114.0, 92.4, 55.5.

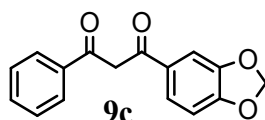

**1-(benzo[d][1,3]dioxol-5-yl)-3-phenylpropane-1,3-dione (9c).**<sup>1</sup> General procedure to prepare 1,3-diketones was followed employing 1-(1,3-benzodioxol-5-yl)-2-bromoethan-

1-one (**8c**) (194.4 mg, 0.8 mmol) and compound **7** (150 mg, 0.8 mmol) in 3.2 mL of toluene. Purification by column chromatography eluting with hexane/EtOAc (90:10) provided **9c** with 66% yield, as a white solid.  $^1\text{H}$  NMR (300 MHz,  $\text{CDCl}_3$ )  $\delta$  7.94 (d,  $J = 8.2$  Hz, 2H), 7.65 – 7.34 (m, 5H), 6.86 (d,  $J = 8.2$  Hz, 1H), 6.72 (s, 1H), 6.03 (s, 2H).  $^{13}\text{C}$  NMR (75 MHz,  $\text{CDCl}_3$ )  $\delta$  186.1, 183.7, 151.4, 148.2, 135.3, 132.2, 130.2, 128.6, 127.0, 122.9, 108.2

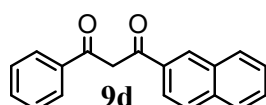

**1-(naphthalen-2-yl)-3-phenylpropane-1,3-dione (9d).**<sup>3</sup> General procedure to prepare 1,3-diketones was followed employing 2-bromo-2'-acetone naphthone (**8d**) (380 mg, 2 mmol) and compound **7** (503 mg, 2 mmol) in 8 mL of toluene. Purification by column chromatography eluting with hexane/EtOAc (95:5) provided **9d** with 87% yield (477 mg), as a white solid.  $^1\text{H}$  NMR (300 MHz,  $\text{CDCl}_3$ )  $\delta$  8.54 (s, 1H), 8.12 – 7.73 (m, 6H), 7.68 – 7.38 (m, 5H), 7.01 (s, 1H).  $^{13}\text{C}$  NMR (75 MHz,  $\text{CDCl}_3$ )  $\delta$  185.8, 185.6, 135.6, 135.3, 132.81, 132.8, 132.5, 129.4, 128.7, 128.5, 128.3, 128.2, 127.8, 127.2, 126.8, 123.3, 93.5.

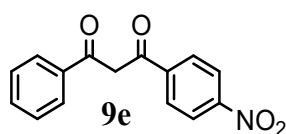

**1-(4-nitrophenyl)-3-phenylpropane-1,3-dione (9e).**<sup>1</sup> General procedure to prepare 1,3-diketones was followed employing 2-bromo-4-nitroacetophenone (**8e**) (519 mg, 2.13 mmol) and compound **7** (400 mg, 2.13 mmol) in 8.5 mL of toluene. Purification by column chromatography eluting with hexane/EtOAc (95:5) provided **9e** with 60% yield (344 mg), as a yellow solid.  $^1\text{H}$  NMR (300 MHz,  $\text{CDCl}_3$ )  $\delta$  8.34 (d,  $J = 8.8$  Hz, 2H), 8.14 (d,  $J = 8.8$  Hz, 2H), 8.01 (d,  $J = 7.6$  Hz, 2H), 7.61 (t,  $J = 7.2$  Hz, 1H), 7.53 (t,  $J = 7.2$  Hz,

2H), 6.90 (s, 1H).  $^{13}\text{C}$  NMR (75 MHz,  $\text{CDCl}_3$ ):  $\delta = 188.0, 181.8, 150.0, 141.1, 135.3, 133.3, 129.0, 128.2, 127.6, 124.0, 94.4$ .

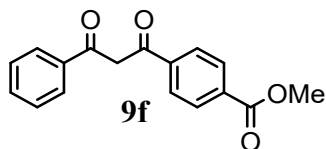

**methyl 4-(3-oxo-3-phenylpropanoyl)benzoate (9f).**<sup>1</sup> General procedure to prepare 1,3-diketones was followed employing methyl 4-(2-bromoacetyl)benzoate (**8f**) (360 mg, 1.4 mmol) and compound **7** (263 mg, 1.4 mmol) in 6 mL of toluene. Purification by column chromatography eluting with hexane/EtOAc (95:5) provided **9f** with 50% yield (197 mg), as a white solid.  $^1\text{H}$  NMR (300 MHz,  $\text{CDCl}_3$ )  $\delta$  8.13 (d,  $J = 8.5$  Hz, 2H), 8.01 (d,  $J = 8.5$  Hz, 2H), 7.62 – 7.41 (m, 4H), 6.88 (s, 1H), 3.95 (s, 3H).  $^{13}\text{C}$  NMR (100 MHz,  $\text{CDCl}_3$ ):  $\delta = 187.3, 183.7, 166.4, 139.4, 135.6, 133.4, 132.9, 130.0, 128.9, 127.5, 127.2, 94.1, 52.6$ .

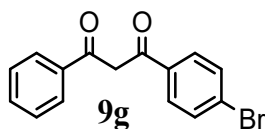

**1-(4-bromophenyl)-3-phenylpropane-1,3-dione (9g).**<sup>1</sup> General procedure to prepare 1,3-diketones was followed employing 2-bromo-4'-bromoacetophenone (**8g**) (740 mg, 2.7 mmol) and compound **7** (500 mg, 2.7 mmol) in 10 mL of toluene. Purification by column chromatography eluting with hexane/EtOAc (98:2) provided **9g** with 83% yield (681 mg), as a white solid.  $^1\text{H}$  NMR (300 MHz,  $\text{CDCl}_3$ )  $\delta$  7.97 (d,  $J = 6.9$  Hz, 2H), 7.83 (d,  $J = 8.5$  Hz, 2H), 7.61 (d,  $J = 8.5$  Hz, 2H), 7.57 – 7.43 (m, 3H), 6.80 (s, 1H).  $^{13}\text{C}$  NMR (75 MHz,  $\text{CDCl}_3$ )  $\delta$  185.9, 184.6, 135.3, 134.4, 132.6, 131.9, 128.7, 128.7, 127.3, 127.2, 93.0.

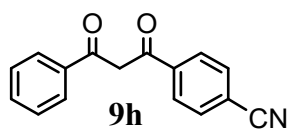

**4-(3-oxo-3-phenylpropanoyl)benzonitrile (9h).**<sup>1</sup> General procedure to prepare 1,3-diketones was followed employing 4-(2-bromoacetyl) benzonitrile (**8h**) (473 mg, 2.1 mmol) and compound **7** (400 mg, 2.1 mmol) in 8.5 mL of toluene. Purification by column chromatography eluting with hexane/EtOAc (98:2) provided **9h** with 66% yield (346.5 mg), as a white solid. <sup>1</sup>H NMR (300 MHz, CDCl<sub>3</sub>) δ 8.07 (d, *J* = 8.4 Hz, 2H), 8.00 (d, *J* = 7.2 Hz, 2H), 7.79 (d, *J* = 7.2 Hz, 2H), 7.66 – 7.56 (m, 2H), 7.56 – 7.46 (m, 2H), 6.86 (s, 1H). <sup>13</sup>C NMR (75 MHz, CDCl<sub>3</sub>) δ 187.5, 182.2, 139.3, 135.2, 133.1, 132.5, 128.8, 127.6, 127.4, 118.1, 115.5, 93.9.

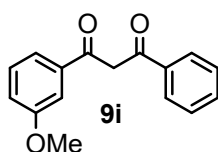

**1-(3-methoxyphenyl)-3-phenylpropane-1,3-dione (9i).**<sup>1</sup> General procedure to prepare 1,3-diketones was followed employing 2-bromo-1-(3-methoxyphenyl)ethanone (365.1 mg, 1.6 mmol) and compound **7** (300 mg, 1.6 mmol) in 4.0 mL of toluene. Purification by column chromatography eluting with hexane/EtOAc (95:5) provided **9i** with 72% yield (290.0 mg), as a white solid. <sup>1</sup>H NMR (300 MHz, CDCl<sub>3</sub>) δ 7.99 – 7.94 (m, 2H), 7.57 – 7.42 (m, 5H), 7.37 (t, *J* = 8.0 Hz, 1H), 7.08 (d, *J* = 8.0 Hz, 1H), 6.82 (s, 1H), 3.85 (s, 3H). <sup>13</sup>C NMR (75 MHz, CDCl<sub>3</sub>) δ 185.9, 185.4, 159.9, 137.1, 132.5, 129.7, 128.7, 127.2, 119.6, 118.6, 112.0, 93.4, 55.5.

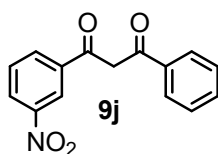



**1-(3-nitrophenyl)-3-phenylpropane-1,3-dione (9j).**<sup>1</sup> General procedure to prepare 1,3-diketones was followed employing 2-bromo-1-(3-nitrophenyl)ethanone (194.4 mg, 0.8 mmol) and compound **7** (150 mg, 0.8 mmol) in 3.2 mL of toluene. Purification by column chromatography eluting with hexane/EtOAc (95:5) provided **9j** with 50% yield (108 mg), as a yellow solid. <sup>1</sup>H NMR (300 MHz, CDCl<sub>3</sub>) δ 8.80 (t, *J* = 2.1 Hz, 1H), 8.40 (ddd, *J* = 8.0, 2.0, 1.1 Hz, 1H), 8.33 (ddd, *J* = 8.0, 2.0, 1.1 Hz, 1H), 8.05 – 8.00 (m, 2H), 7.70 (t, *J* = 8.0 Hz, 1H), 7.64 – 7.57 (m, 1H), 7.57 – 7.49 (m, 2H), 6.91 (s, 1H).<sup>13</sup>C NMR (75 MHz, CDCl<sub>3</sub>) δ 186.8, 182.6, 148.5, 137.3, 134.9, 133.1, 132.8, 129.9, 128.9, 127.4, 126.6, 122.0, 93.4.

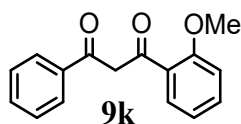

**1-(2-methoxyphenyl)-3-phenylpropane-1,3-dione (9k).**<sup>1</sup> General procedure to prepare 1,3-diketones was followed employing 2-bromo-1-(2-methoxyphenyl)ethanone (365.1 mg, 1.6 mmol) and compound **7** (300 mg, 1.6 mmol) in 4.0 mL of toluene. Purification by column chromatography eluting with hexane/EtOAc (95:5) provided **9k** with 35% yield (140.0 mg), as a white solid. <sup>1</sup>H NMR (300 MHz, CDCl<sub>3</sub>) δ 8.04 – 7.93 (m, 3H), 7.57 – 7.45 (m, 4H), 7.14 (s, 1H), 7.09 – 7.05 (m, 1H), 7.02 – 6.97 (m, 1H), 3.95 (s, 3H).<sup>13</sup>C NMR (75 MHz, CDCl<sub>3</sub>) δ 185.8, 184.2, 158.5, 136.0, 133.1, 132.2, 130.3, 128.3, 127.2, 124.9, 120.8, 111.7, 98.5, 55.8.

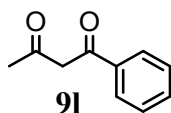

**1-phenylbutane-1,3-dione (9l).**<sup>1</sup> General procedure to prepare 1,3-diketones was followed employing 1-bromopropan-2-one (**8l**) (411.7 mg, 2.2 mmol) and compound **7** (300 mg, 2.2 mmol) in 8.8 mL of toluene. Purification by column chromatography eluting with hexane/EtOAc (98:2) provided **9l** with 29% yield (103 mg), as a white solid. <sup>1</sup>H

NMR (300 MHz, CDCl<sub>3</sub>)  $\delta$  7.88 (d,  $J$  = 7.2 Hz, 2H), 7.58 – 7.39 (m, 3H), 6.18 (s, 1H), 2.20 (s, 3H). <sup>13</sup>C NMR (75 MHz, CDCl<sub>3</sub>)  $\delta$  193.8, 183.3, 134.9, 132.3, 128.6, 127.0, 96.7, 25.9.

### 2.1.2. Synthesis of 5-bromo-2-methylpent-2-ene (11)<sup>4</sup>

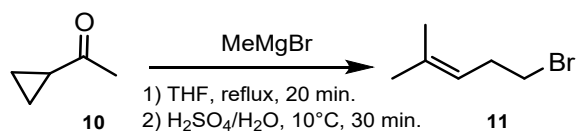

A solution of cyclopropylmethyl ketone (**10**) (5g, 59.5 mmol, 1.0 equiv.) in anhydrous THF (8 mL) was added dropwise to a solution of methylmagnesium bromide (3M in Et<sub>2</sub>O, 71.4 mmol, 1.2 equiv.) at room temperature. The mixture was then heated at reflux for 30 minutes. The reaction mixture was cooled to 0°C, and slowly added to a cooled solution of concentrate sulphuric acid in water (1:2). After completion of the addition, the mixture was stirred for 30 minutes. The organic layer was then separated and the aqueous phase was extracted with diethyl ether (3×10 mL). The combined organic extracts were washed with saturated NaHCO<sub>3</sub> and brine, dried over Na<sub>2</sub>SO<sub>4</sub>, filtered and concentrated under reduced pressure. The residue was distilled under vacuum to give 5-bromo-2-methylpent-2-ene (**11**) as a colorless oil (7.76g, 80% yield). <sup>1</sup>H NMR (300 MHz, CDCl<sub>3</sub>)  $\delta$  5.17 – 5.07 (m, 1H), 3.34 (t,  $J$  = 7.3 Hz, 2H), 2.56 (q,  $J$  = 7.3 Hz, 2H), 1.72 (s, 3H), 1.63 (s, 3H). <sup>13</sup>C NMR (75 MHz, CDCl<sub>3</sub>)  $\delta$  135.2, 121.1, 33.0, 32.0, 25.8, 18.1.

### 2.1.3. General Alkylation Procedure for the Synthesis of Compounds 1a-l<sup>5</sup>

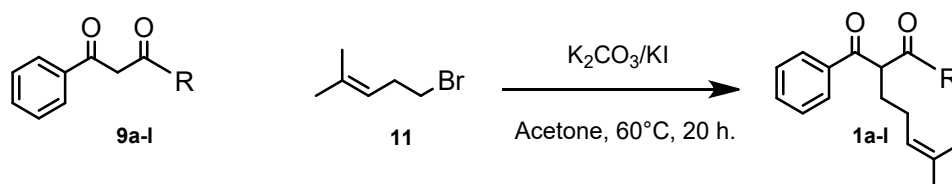

A round bottom flask equipped with a magnetic stir bar was charged with K<sub>2</sub>CO<sub>3</sub> (2.5 equiv.) and KI (1.5 equiv.). Dry acetone (0.2 M) was then added, followed by the 1,3-

diketone **9a-l** (1 equiv.) and 5-bromo-2-methylpent-2-ene (**11**) (1.2 equiv). The resulting mixture was heated at reflux and stirred overnight. The reaction was then cooled to room temperature, quenched with H<sub>2</sub>O and extracted with Et<sub>2</sub>O (3x10 mL). The combined organic extracts were washed with H<sub>2</sub>O and brine, dried over MgSO<sub>4</sub>, filtered and concentrated under reduced pressure by rotary evaporation. Purification by column chromatography using hexane/ethyl acetate as the eluent provided compound **1a-l**.

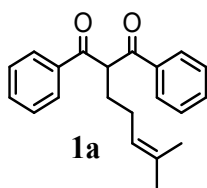

**2-(4-Methylpent-3-en-1-yl)-1,3-diphenylpropane-1,3-dione (1a).**<sup>6</sup> General procedure 2.1.3. was followed employing compound **9a** (300 mg, 1.34 mmol) and 5-bromo-2-methylpent-2-ene (**11**) (262 mg, 1.60 mmol) in 6.7 mL of dry acetone. Purification by column chromatography eluting with hexane/EtOAc (98:2) provided **1a** with 60% yield (246 mg), as a white solid. <sup>1</sup>H NMR (300 MHz, CDCl<sub>3</sub>) δ 7.96 (d, *J* = 7.2 Hz, 2H), 7.61 – 7.48 (m, 2H), 7.43 (td, *J* = 7.5, 7.1, 1.5 Hz, 5H), 5.27-5.23 (m, 1H), 5.19-5.15 (m, 1H), 2.25 – 2.04 (m, 4H), 1.69 (s, 3H), 1.50 (s, 3H). <sup>13</sup>C NMR (75 MHz, CDCl<sub>3</sub>) δ 196.2, 136.2, 133.7, 133.4, 128.8, 128.5, 123.2, 56.0, 29.4, 26.5, 25.7, 17.7. HRMS (ESI+) calcd. for [C<sub>21</sub>H<sub>22</sub>O<sub>2</sub> + H] : 307.1685, found: 307.1693.

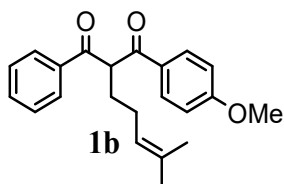

**1-(4-Methoxyphenyl)-2-(4-methylpent-3-en-1-yl)-3-phenylpropane-1,3-dione (1b).** General procedure 2.1.3. was followed employing compound **9b** (274.6 mg, 1.08 mmol)

and 5-bromo-2-methylpent-2-ene (**11**) (211.5 mg, 1.30 mmol) in 5.4 mL of dry acetone. Purification by column chromatography eluting with hexane/EtOAc (98:2) provided **1b** with 70% yield (255.5 mg), as an orange solid.  $^1\text{H}$  NMR (300 MHz,  $\text{CDCl}_3$ )  $\delta$  8.06 – 7.66 (m, 4H), 7.69 – 7.49 (m, 1H), 7.50 – 7.38 (m, 2H), 7.00 – 6.82 (m, 2H), 5.24 – 5.06 (m, 2H), 3.86 (s, 3H), 2.39 – 1.86 (m, 4H), 1.70 (d,  $J = 1.3$  Hz, 3H), 1.50 (d,  $J = 1.3$  Hz, 3H).  $^{13}\text{C}$  NMR (75 MHz,  $\text{CDCl}_3$ )  $\delta$  196.3, 194.7, 163.7, 136.3, 133.6, 133.3, 130.9, 129.1, 128.8, 128.5, 123.3, 114.0, 56.2, 55.5, 29.5, 26.5, 25.7, 17.7. HRMS (ESI+) calcd. for  $[\text{C}_{22}\text{H}_{24}\text{O}_3 + \text{Na}]$  : 359.1607, found: 359.1618.

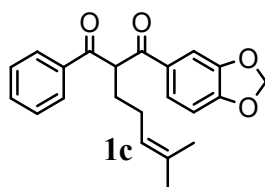

**1-(Benzo[d][1,3]dioxol-5-yl)-2-(4-methylpent-3-en-1-yl)-3-phenylpropane-1,3-dione (1c).** General procedure 2.1.3. was followed employing compound **9c** (274 mg, 1.02 mmol) and 5-bromo-2-methylpent-2-ene (**11**) (200 mg, 1.23 mmol) in 6 mL of dry acetone. Purification by column chromatography eluting with hexane/EtOAc (98:2) provided **1c** with yields of 56% (200 mg), as a white solid.  $^1\text{H}$  NMR (300 MHz,  $\text{CDCl}_3$ )  $\delta$  7.99 – 7.90 (m, 2H), 7.59 – 7.51 (m, 2H), 7.47 – 7.40 (m, 3H), 6.82 (d,  $J = 8.2$  Hz, 1H), 6.03 (s, 2H), 5.20 – 5.13 (m, 1H), 5.13 – 5.07 (m, 1H), 2.20 – 2.07 (m, 4H), 1.70 (d,  $J = 1.4$  Hz, 3H), 1.51 (d,  $J = 1.4$  Hz, 3H).  $^{13}\text{C}$  NMR (75 MHz,  $\text{CDCl}_3$ )  $\delta$  196.2, 194.3, 152.1, 148.4, 136.17, 133.7, 133.4, 130.9, 128.8, 128.5, 124.9, 123.2, 108.4, 108.0, 101.9, 56.2, 29.5, 26.5, 25.7, 17.7. HRMS (ESI+) calcd. for  $[\text{C}_{22}\text{H}_{22}\text{O}_4 + \text{Na}]$  : 373.1426, found: 373.1410.

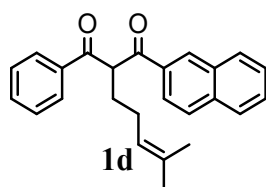

**2-(4-Methylpent-3-en-1-yl)-1-(naphthalen-2-yl)-3-phenylpropane-1,3-dione (1d).**

General procedure 2.1.3. was followed employing compound **9d** (400 mg, 1.46 mmol) and 5-bromo-2-methylpent-2-ene (**11**) (285.5 mg, 1.75 mmol) in 7 mL of dry acetone. Purification by column chromatography eluting with hexane/EtOAc (98:2) provided **1d** with 46% yield (240 mg), as a yellow solid. <sup>1</sup>H NMR (300 MHz CDCl<sub>3</sub>) δ 8.49 (s, 1H), 8.07 – 7.95 (m, 3H), 7.94 – 7.81 (m, 3H), 7.65 – 7.48 (m, 3H), 7.47 – 7.39 (m, 2H), 5.37 (t, *J* = 4.9 Hz, 1H), 5.28 – 5.13 (m, 1H), 2.43 – 2.07 (m, 4H), 1.73 (d, *J* = 1.4 Hz, 3H), 1.51 (d, *J* = 1.4 Hz, 3H). <sup>13</sup>C NMR (75 MHz, CDCl<sub>3</sub>) δ 196.3, 196.2, 136.3, 135.7, 133.7, 133.5, 133.4, 132.5, 130.4, 129.7, 128.9, 128.8, 128.7, 128.5, 127.8, 126.9, 124.2, 123.3, 56.3, 29.5, 26.5, 25.8, 17.8. HRMS (ESI+) calcd. for [C<sub>25</sub>H<sub>24</sub>O<sub>2</sub> + Na]: 379.1687, found: 379.1669.

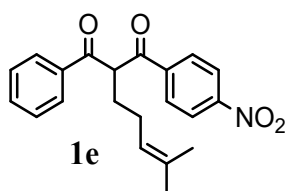

**2-(4-Methylpent-3-en-1-yl)-1-(4-nitrophenyl)-3-phenylpropane-1,3-dione (1e).**

General procedure 2.1.3. was followed employing compound **9e** (400 mg, 1.49 mmol) and 5-bromo-2-methylpent-2-ene (**11**) (291 mg, 1.78 mmol) in 7 mL of dry acetone. Purification by column chromatography eluting with hexane/EtOAc (95:5) provided **1e** with 15% yield (78.4 mg), as a yellow solid. <sup>1</sup>H NMR (300 MHz, CDCl<sub>3</sub>) δ 8.31 – 8.23 (m, 2H), 8.10 – 8.04 (m, 2H), 7.99 – 7.93 (m, 2H), 7.66 – 7.57 (m, 1H), 7.56 – 7.44 (m, 2H), 5.26 – 5.07 (m, 2H), 2.32 – 2.05 (m, 4H), 1.70 (d, *J* = 1.4 Hz, 3H), 1.50 (d, *J* = 1.4

Hz, 3H).  $^{13}\text{C}$  NMR (75 MHz,  $\text{CDCl}_3$ )  $\delta$  196.0, 194.7, 150.3, 140.8, 135.6, 134.1, 133.9, 129.4, 129.1, 128.6, 124.0, 122.9, 113.8, 94.3, 56.7, 29.2, 26.3, 25.7, 17.8. HRMS (ESI+) calcd. for  $[\text{C}_{21}\text{H}_{21}\text{NO}_4 + \text{Na}]$ : 374.1348, found: 374.1363.

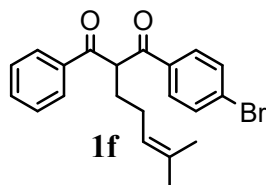

**1-(4-Bromophenyl)-2-(4-methylpent-3-en-1-yl)-3-phenylpropane-1,3-dione (1f).**

General procedure 2.1.3. was followed employing compound **9f** (400 mg, 1.32 mmol) and 5-bromo-2-methylpent-2-ene (**11**) (257 mg, 1.58 mmol) in 6.6 mL of dry acetone. Purification by column chromatography eluting with hexane/EtOAc (95:5) provided **1f** with 25% yield (127.4 mg), as a yellow oil.  $^1\text{H}$  NMR (300 MHz,  $\text{CDCl}_3$ )  $\delta$  7.97 – 7.91 (m, 2H), 7.83 – 7.77 (m, 2H), 7.61 – 7.53 (m, 3H), 7.49 – 7.40 (m, 2H), 5.21 – 5.09 (m, 2H), 2.23 – 2.07 (m, 3H), 1.70 (d,  $J = 1.4$  Hz, 3H), 1.50 (d,  $J = 1.4$  Hz, 3H).  $^{13}\text{C}$  NMR (75 MHz,  $\text{CDCl}_3$ )  $\delta$  196.0, 195.2, 135.9, 134.9, 133.9, 133.6, 132.1, 130.0, 128.9, 128.7, 128.6, 123.0, 56.3, 29.3, 26.4, 25.7, 17.8. HRMS (ESI+) calcd. for  $[\text{C}_{21}\text{H}_{19}\text{BrO}_2 + \text{H}]$ : 383.0652, found: 383.0641.

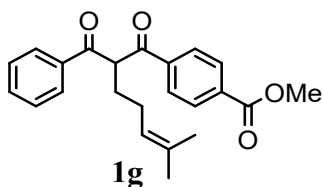

**Methyl 4-(2-benzoyl-6-methylhept-5-enoyl)benzoate (1g).** General procedure 2.1.3. was followed employing compound **9g** (100 mg, 0.35 mmol) and 5-bromo-2-methylpent-2-ene (**11**) (68.5 mg, 0.42 mmol) in 1.75 mL of dry acetone. Purification by column chromatography eluting with hexane/EtOAc (98:2) provided **1g** with 59% yield (75.16

mg), as a yellow oil.  $^1\text{H}$  NMR (300 MHz,  $\text{CDCl}_3$ )  $\delta$  8.12 – 8.06 (m, 2H), 8.00 – 7.93 (m, 4H), 7.62 – 7.54 (m, 1H), 7.49 – 7.43 (m, 2H), 5.26 – 5.10 (m, 2H), 3.93 (s, 3H), 2.28 – 2.05 (m, 4H), 1.70 (d,  $J = 1.4$  Hz, 3H), 1.49 (d,  $J = 1.4$  Hz, 3H).  $^{13}\text{C}$  NMR (75 MHz,  $\text{CDCl}_3$ )  $\delta$  196.1, 195.7, 166.1, 139.5, 135.9, 133.9, 133.6, 130.0, 128.9, 128.6, 128.4, 123.0, 56.4, 52.5, 29.3, 26.4, 25.7, 17.8. HRMS (ESI+) calcd. for  $[\text{C}_{23}\text{H}_{24}\text{O}_4 + \text{H}]$ : 365.1732, found: 365.1747.

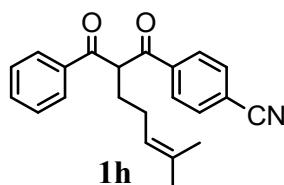

**4-(2-Benzoyl-6-methylhept-5-enoyl) benzonitrile (1h).** General procedure 2.1.3. was followed employing compound **9h** (184 mg, 0.74 mmol) and 5-bromo-2-methylpent-2-ene (**11**) (144 mg, 0.88 mmol) in 3.7 mL of dry acetone. Purification by column chromatography eluting with hexane/EtOAc (95:5) provided **1h** with 30% yield (73.7 mg), as a yellow solid.  $^1\text{H}$  NMR (300 MHz,  $\text{CDCl}_3$ )  $\delta$  8.03 – 7.91 (m, 4H), 7.76 – 7.69 (m, 2H), 7.65 – 7.56 (m, 1H), 7.55 – 7.43 (m, 2H), 5.42 – 4.90 (m, 2H), 2.34 – 2.02 (m, 4H), 1.69 (s, 3H), 1.49 (s, 3H).  $^{13}\text{C}$  NMR (75 MHz,  $\text{CDCl}_3$ )  $\delta$  195.9, 194.9, 139.3, 135.6, 134.1, 133.9, 132.6, 132.5, 132.5, 129.0, 128.8, 128.8, 128.7, 128.6, 122.9, 117.7, 116.6, 56.5, 29.2, 26.4, 25.7, 17.7. HRMS (ESI+) calcd. for  $[\text{C}_{22}\text{H}_{21}\text{NO}_2 + \text{Na}]$ : 354.1466, found: 354.1464.

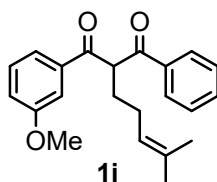

**1-(3-methoxyphenyl)-2-(4-methylpent-3-en-1-yl)-3-phenylpropane-1,3-dione (1i).**

General procedure 2.1.3. was followed employing compound **9i** (100 mg, 0.393 mmol)

and 5-bromo-2-methylpent-2-ene (**11**) (96 mg, 0.590 mmol) in 3 mL of dry acetone. Purification by column chromatography eluting with hexane/EtOAc (95:5) provided **1i** with 49% yield (49.0 mg), as a yellow oil. <sup>1</sup>H NMR (300 MHz, CDCl<sub>3</sub>) δ 7.98 – 7.92 (m, 2H), 7.59 – 7.48 (m, 3H), 7.48 – 7.40 (m, 2H), 7.34 (t, *J* = 8.0 Hz, 1H), 7.09 (ddd, *J* = 8.0, 2.7, 1.0 Hz, 1H), 5.25 – 5.13 (m, 2H), 3.79 (s, 3H), 2.20 – 2.10 (m, 4H), 1.70 (d, *J* = 1.3 Hz, 3H), 1.50 (d, *J* = 1.3 Hz, 3H). <sup>13</sup>C NMR (75 MHz, CDCl<sub>3</sub>) δ 196.2, 196.0, 160.0, 137.5, 136.2, 133.7, 133.4, 129.8, 128.8, 128.5, 123.2, 121.0, 120.1, 112.7, 56.1, 55.4, 29.4, 26.5, 25.7, 17.8. HRMS (ESI+) calcd. for [C<sub>22</sub>H<sub>24</sub>O<sub>3</sub> + Na]: 359.1618, found: 359.1631.

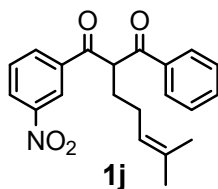

**2-(4-methylpent-3-en-1-yl)-1-(3-nitrophenyl)-3-phenylpropane-1,3-dione (1j).**

General procedure 2.1.3. was followed employing compound **9j** (100 mg, 0.371 mmol) and 5-bromo-2-methylpent-2-ene (**11**) (91 mg, 0.557 mmol) in 3 mL of dry acetone. Purification by column chromatography eluting with hexane/EtOAc (95:5) provided **1j** with 29% yield (38.0 mg), as a yellow solid. <sup>1</sup>H NMR (300 MHz, CDCl<sub>3</sub>) δ 8.77 (t, *J* = 2.1 Hz, 1H), 8.40 (ddd, *J* = 8.2, 2.1, 1.1 Hz, 1H), 8.25 (ddd, *J* = 7.8, 1.7, 1.1 Hz, 1H), 8.00 – 7.92 (m, 2H), 7.70 – 7.56 (m, 2H), 7.54 – 7.44 (m, 2H), 5.28 – 5.13 (m, 2H), 2.29 – 2.08 (m, 4H), 1.72 (d, *J* = 1.4 Hz, 3H), 1.50 (d, *J* = 1.4 Hz, 3H). <sup>13</sup>C NMR (75 MHz, CDCl<sub>3</sub>) δ 195.9, 194.1, 148.5, 137.5, 135.7, 134.3, 134.0, 133.9, 130.1, 129.1, 128.6, 127.6, 123.3, 122.8, 56.3, 29.3, 26.3, 25.7, 17.8. HRMS (ESI+) calcd. for [C<sub>21</sub>H<sub>21</sub>NO<sub>4</sub> + Na]: 374.1363, found: 374.1378.

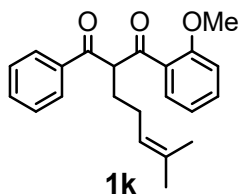



**1-(2-methoxyphenyl)-2-(4-methylpent-3-en-1-yl)-3-phenylpropane-1,3-dione (1k).**

General procedure 2.1.3. was followed employing compound **9k** (100 mg, 0.393 mmol) and 5-bromo-2-methylpent-2-ene (**11**) (96 mg, 0.590 mmol) in 3 mL of dry acetone. Purification by column chromatography eluting with hexane/EtOAc (95:5) provided **1k** with 19% yield (25.0 mg), as a yellow oil. <sup>1</sup>H NMR (300 MHz, CDCl<sub>3</sub>) δ 8.02 – 7.97 (m, 2H), 7.85 (dd, *J* = 7.9, 1.8 Hz, 1H), 7.60 – 7.53 (m, 1H), 7.51 – 7.41 (m, 3H), 7.01 (ddd, *J* = 7.9, 7.3, 1.0 Hz, 1H), 6.87 (dd, *J* = 7.9, 1.0 Hz, 1H), 5.35 (dd, *J* = 7.9, 4.6 Hz, 1H), 5.18 – 5.10 (m, 1H), 3.50 (s, 3H), 2.28 – 2.16 (m, 1H), 2.11 (q, *J* = 7.1 Hz, 2H), 1.94 – 1.83 (m, 1H), 1.68 (d, *J* = 1.4 Hz, 3H), 1.50 (d, *J* = 1.4 Hz, 3H). <sup>13</sup>C NMR (75 MHz, CDCl<sub>3</sub>) δ 196.9, 196.7, 158.3, 136.4, 134.0, 133.1, 132.9, 131.3, 128.6, 128.5, 126.9, 123.6, 121.0, 111.4, 59.6, 54.9, 28.9, 26.7, 25.7, 17.7. HRMS (ESI+) calcd. for [C<sub>22</sub>H<sub>24</sub>O<sub>3</sub> + Na]: 359.1618, found: 359.1608.

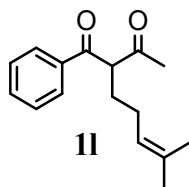

**2-(4-Methylpent-3-en-1-yl)-1-phenylbutane-1,3-dione (1l).** General procedure 2.1.3. was followed employing compound **9l** (186 mg, 1.15 mmol) and 5-bromo-2-methylpent-2-ene (**11**) (225 mg, 1.38 mmol) in 3.7 mL of dry acetone. Purification by column chromatography eluting with hexane/EtOAc (99:1) provided **1l** with 29% yield (81.4 mg), as a colorless oil. <sup>1</sup>H NMR (300 MHz, CDCl<sub>3</sub>) δ 8.07 – 7.88 (m, 2H), 7.67 – 7.52 (m, 1H), 7.52 – 7.44 (m, 2H), 5.16 – 4.93 (m, 1H), 4.45 (t, *J* = 6.6 Hz, 1H), 2.14 (s, 3H), 2.13 – 1.81 (m, 4H), 1.65 (d, *J* = 1.4 Hz, 3H), 1.49 (d, *J* = 1.4 Hz, 3H). <sup>13</sup>C NMR (75 MHz, CDCl<sub>3</sub>) δ 204.5, 196.6, 136.5, 133.6, 133.4, 128.8, 128.7, 122.9, 62.70 29.2, 27.9, 26.0, 25.7, 17.6. HRMS (ESI+) calcd. for [C<sub>16</sub>H<sub>20</sub>O<sub>2</sub> + Na]: 267.1350, found: 267.1356.

## 2.2. General Procedure for the Synthesis of Starting Materials 5a-e

### 2.2.1 Synthesis of diethyl 2-(3-methylbut-2-en-1-yl)malonate (**14**).

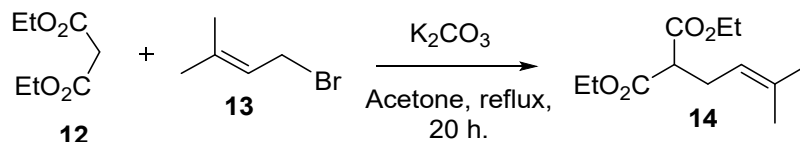

1-Bromo-3-methylbut-2-ene (**13**) (820 mg, 5.5 mmol, 1.1 equiv.) and  $K_2CO_3$  (1.38 g, 10 mmol, 2.0 equiv.), were sequentially added to a stirred solution of dimethyl malonate (**12**) (800 mg, 5 mmol, 1 equiv.) in acetone (12,5 mL). The resulting mixture was stirred at room temperature overnight. Then  $K_2CO_3$  was removed by filtration through a funnel. The resulting mixture was then extracted with ethyl ether ( $3 \times 10$  mL), washed with saturated brine, dried over  $Na_2SO_4$ , and evaporated under reduced pressure. The residue was purified by column chromatography (hexane/EtOAc, 95:5) to afford diethyl 2-(3-methylbut-2-en-1-yl)malonate (**14**) with 89% yield (1.2 g).  $^1H$  NMR (300 MHz,  $CDCl_3$ )  $\delta$  5.17 – 4.95 (m, 1H), 4.19 (q,  $J = 7.1$  Hz, 4H), 3.32 (t,  $J = 7.6$  Hz, 1H), 2.58 (t,  $J = 7.6$  Hz, 2H), 1.68 (s, 3H), 1.63 (s, 3H), 1.26 (t,  $J = 7.1$  Hz, 6H).  $^{13}C$  NMR (75 MHz,  $CDCl_3$ )  $\delta$  169.3, 134.8, 119.7, 61.3, 52.2, 27.5, 25.8, 17.7, 14.1.

### 2.2.2 General Alkylation Procedure for the Synthesis of Compounds 5a-e.

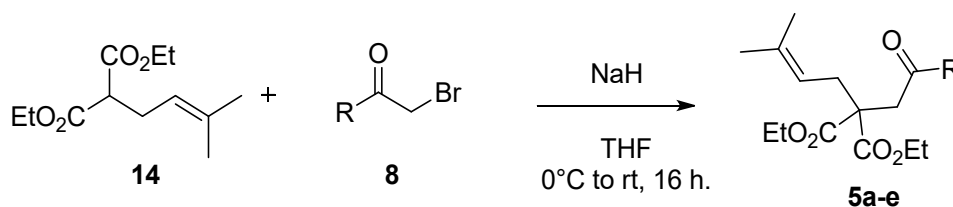

A round bottom flask was charged with NaH (2 equiv.) followed by THF (0.1 M) under a nitrogen atmosphere. The resulting suspension was then cooled to  $0^\circ C$  and a solution of diethyl 2-(3-methylbut-2-en-1-yl)malonate (**14**) (1.0 equiv.) in THF (0.5 M) was added

dropwise over 20 min. The cooling bath was removed and the reaction mixture was allowed to warm to rt over 45 min. A solution of the corresponding  $\alpha$ -bromoacetophenone (**8**) (1.1 equiv.) in THF (0.6 M) was rapidly added. The resulting mixture was stirred at room temperature for 16 h. Then 1M hydrochloric acid was added, and the resulting mixture was stirred for 10 min and extracted with EtOAc (3x10mL). The combined organic extracts were dried over MgSO<sub>4</sub> and concentrated under reduced pressure. The residue was purified by column chromatography (hexane/ethyl acetate) affording products **5a-e**.

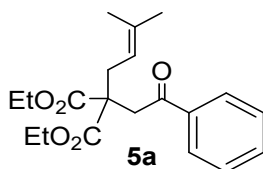

**Diethyl 2-(3-methylbut-2-en-1-yl)-2-(2-oxo-2-phenylethyl)malonate (5a).** General procedure 2.2.2. was followed with diethyl 2-(3-methylbut-2-en-1-yl) malonate (**14**) (200 mg, 0.88 mmol) and 2-bromoacetophenone (**8a**) (286.3 mg, 0.96 mmol). Purification by column chromatography eluting with hexane/EtOAc (95:5) provided **5a** with 29% yield (88.3 mg), as a yellow oil. <sup>1</sup>H NMR (300 MHz, CDCl<sub>3</sub>)  $\delta$  8.03 – 7.88 (m, 2H), 7.64 – 7.51 (m, 1H), 7.51 – 7.36 (m, 2H), 4.96 (t,  $J = 6.7$  Hz, 1H), 4.21 (q,  $J = 7.1$  Hz, 4H), 3.65 (s, 2H), 2.84 (d,  $J = 7.8$  Hz, 2H), 1.62 (d,  $J = 1.5$  Hz, 3H), 1.42 (d,  $J = 1.5$  Hz, 3H), 1.24 (td,  $J = 7.1, 1.2$  Hz, 6H). <sup>13</sup>C NMR (75 MHz, CDCl<sub>3</sub>)  $\delta$  197.0, 170.8, 136.7, 136.3, 133.2, 128.6, 128.0, 118.2, 61.5, 55.5, 40.9, 31.6, 25.9, 17.7, 14.0. HRMS (ESI<sup>+</sup>) calcd. for [C<sub>20</sub>H<sub>26</sub>O<sub>5</sub> + Na]: 369.1672, found: 369.1680.

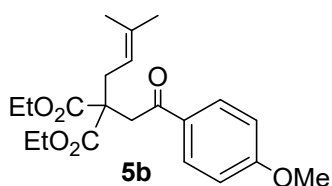

**Diethyl 2-(2-(4-methoxyphenyl)-2-oxoethyl)-2-(3-methylbut-2-en-1-yl)malonate (5b).** General procedure 2.2.2. was followed with diethyl 2-(3-methylbut-2-en-1-yl) malonate (**14**) (150 mg, 0.66 mmol) and 2-bromo-4'-methoxyacetophenone (**8b**) (166 mg, 0.72 mmol). Purification by column chromatography eluting with hexane/EtOAc (95:5) provided **5b** with 46% yield (114 mg), as a yellow solid. <sup>1</sup>H NMR (300 MHz, CDCl<sub>3</sub>) δ 7.95 (d, *J* = 8.9 Hz, 2H), 6.93 (d, *J* = 8.9 Hz, 2H), 4.96 (t, *J* = 7.8 Hz, 1H), 4.21 (q, *J* = 7.1 Hz, 4H), 3.87 (s, 3H), 3.60 (s, 2H), 2.84 (d, *J* = 7.8 Hz, 2H), 1.62 (d, *J* = 1.5 Hz, 3H), 1.42 (d, *J* = 1.5 Hz, 3H), 1.24 (t, *J* = 7.1 Hz, 6H). <sup>13</sup>C NMR (75 MHz, CDCl<sub>3</sub>) δ 195.5, 170.8, 163.5, 136.2, 130.3, 129.8, 118.2, 113.7, 61.4, 55.5, 40.4, 31.5, 25.9, 17.8, 14.0. HRMS (ESI<sup>+</sup>) calcd. for [C<sub>21</sub>H<sub>28</sub>O<sub>6</sub> + Na]: 399.1778, found: 399.1780.

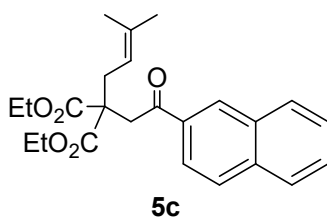

**Diethyl 2-(3-methylbut-2-en-1-yl)-2-(2-(naphthalen-2-yl)-2-oxoethyl)malonate (5c).** General procedure 2.2.2. was followed with diethyl 2-(3-methylbut-2-en-1-yl) malonate (**14**) (200 mg, 0.88 mmol) and 2-bromo-2'-acetoneaphthone (**8d**) (240 mg, 0.96 mmol). Purification by column chromatography eluting with hexane/EtOAc (95:5) provided **5c** with yields of 35% (111.5 mg), as a yellow oil. <sup>1</sup>H NMR (300 MHz, CDCl<sub>3</sub>) δ 8.56 – 8.41 (m, 1H), 8.06 – 7.94 (m, 2H), 7.94 – 7.81 (m, 2H), 7.65 – 7.50 (m, 2H), 5.00 (t, *J* = 7.8 Hz, 1H), 4.24 (q, *J* = 7.1 Hz, 4H), 3.80 (s, 2H), 2.90 (d, *J* = 7.8 Hz, 2H), 1.62 (d, *J* = 1.4 Hz, 3H), 1.42 (d, *J* = 1.4 Hz, 3H), 1.26 (t, *J* = 7.1 Hz, 6H). <sup>13</sup>C NMR (75 MHz, CDCl<sub>3</sub>) δ 196.9, 170.8, 136.4, 135.6, 134.1, 132.5, 129.8, 129.6, 128.5, 128.4, 127.8, 126.8, 123.7, 118.2, 61.6, 55.5, 40.9, 31.5, 25.9, 17.8, 14.0. HRMS (ESI<sup>+</sup>) calcd. for [C<sub>24</sub>H<sub>28</sub>O<sub>5</sub> + Na]: 419.1829, found: 419.1821.

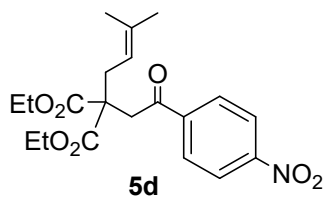

**Diethyl 2-(3-methylbut-2-en-1-yl)-2-(2-(4-nitrophenyl)-2-oxoethyl)malonate (5d).**

General procedure 2.2.2. was followed with diethyl 2-(3-methylbut-2-en-1-yl) malonate (**14**) (200 mg, 0.88 mmol) and 2-bromo-4-nitroacetophenone (**8e**) (235 mg, 0.96 mmol).

Purification by column chromatography eluting with hexane/EtOAc (95:5) provided **5d** with 27% yield (93 mg), as a yellow solid.  $^1\text{H}$  NMR (300 MHz,  $\text{CDCl}_3$ )  $\delta$  8.31 (d,  $J = 8.9$  Hz, 2H), 8.11 (d,  $J = 8.9$  Hz, 2H), 4.96 (t,  $J = 7.8$  Hz, 1H), 4.22 (q,  $J = 7.1$  Hz, 4H), 3.65 (s, 2H), 2.85 (d,  $J = 7.8$  Hz, 2H), 1.63 (d,  $J = 1.5$  Hz, 3H), 1.44 (d,  $J = 1.5$  Hz, 3H), 1.37 – 1.11 (m, 6H).  $^{13}\text{C}$  NMR (75 MHz,  $\text{CDCl}_3$ )  $\delta$  196.5, 171.2, 151.2, 141.9, 137.4, 129.8, 124.6, 118.7, 62.5, 56.4, 42.2, 32.5, 26.7, 18.6, 14.8. HRMS (ESI+) calcd. for  $[\text{C}_{20}\text{H}_{25}\text{NO}_7 + \text{Na}]$ : 414.1523, found: 414.1525.

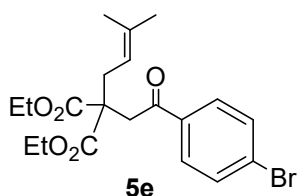

**Diethyl 2-(2-(4-bromophenyl)-2-oxoethyl)-2-(3-methylbut-2-en-1-yl)malonate (5e).**

General procedure 2.2.2. was followed with diethyl 2-(3-methylbut-2-en-1-yl) malonate (**14**) (200 mg, 0.88 mmol) and 2-bromo-4'-bromoacetophenone (**8g**) (286 mg, 0.96 mmol). Purification by column chromatography eluting with hexane/EtOAc (95:5) provided **5e** with 28% yield (104.7 mg), as a colorless oil.  $^1\text{H}$  NMR (300 MHz,  $\text{CDCl}_3$ )  $\delta$  7.82 (d,  $J = 8.6$  Hz, 2H), 7.60 (d,  $J = 8.6$  Hz, 2H), 4.94 (t,  $J = 6.4$  Hz, 1H), 4.21 (q,  $J = 7.1$  Hz, 4H), 3.59 (s, 2H), 2.83 (d,  $J = 7.8$  Hz, 2H), 1.63 (d,  $J = 1.4$  Hz, 3H), 1.43 (d,  $J = 1.4$  Hz, 3H), 1.24 (t,  $J = 7.1$  Hz, 6H).  $^{13}\text{C}$  NMR (75 MHz,  $\text{CDCl}_3$ )  $\delta$  196.1, 170.7, 136.5,

135.5, 131.9, 129.5, 128.5, 118.1, 61.6, 55.5, 40.8, 31.6, 26.0, 17.8, 14.0. HRMS (ESI+) calcd. for  $[C_{20}H_{25}BrO_5 + Na]$ : 447.0778, found: 447.0784

### 2.3. General Procedure for the Synthesis of Starting Material **5f**

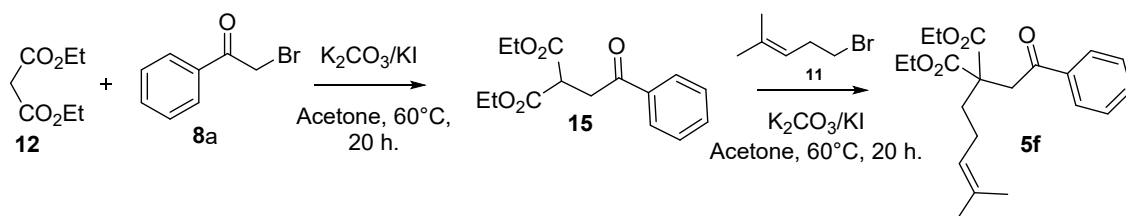

A round bottom flask was charged with  $K_2CO_3$  (1.1 g, 7.8 mmol, 2.5 equiv.) and KI (777 mg, 4.68 mmol, 1.5 equiv). Dry acetone (0.2 M) was then added, followed by diethyl malonate (**12**) (500 mg, 3.12 mmol, 1 equiv.) and 2-bromoacetophenone (**8a**) (750 mg, 3.75 mmol, 1.2 equiv). The resulting mixture was heated at reflux and stirred overnight. The reaction was then cooled to room temperature, quenched with  $H_2O$  and extracted with AcOEt (3x15mL). The combined organic extracts were washed with  $H_2O$  and brine, dried over  $MgSO_4$ , filtered and concentrated under reduced pressure by rotary evaporation. Purification by column chromatography using hexane/ EtOAc (95:5) as the eluent to provide diethyl 2-(2-oxo-2-phenylethyl) malonate (**15**) with 60% yields (520 mg), as a yellow oil.

A round bottom flask was charged with  $K_2CO_3$  (1.1 g, 7.8 mmol, 2.5 equiv.) and KI (777 mg, 4.68 mmol, 1.5 equiv.). Dry acetone (0.2 M) was then added, followed by compound **15** (407 mg, 1.46 mmol, 1 equiv.) and 5-bromo-2-methylpent-2-ene (**11**) (352 mg, 2.16 mmol, 1.2 equiv). The resulting mixture was heated at reflux and stirred overnight. The reaction was then cooled to room temperature, quenched with  $H_2O$  and extracted with AcOEt (3x15mL). The combined organic extracts were washed with  $H_2O$  and brine, dried over  $MgSO_4$ , filtered and concentrated under reduced pressure by rotary evaporation.

Purification by column chromatography using hexane/ EtOAc (95:5) as the eluent to provide **5f** with 19% yield (99.8 mg), as a colorless oil.

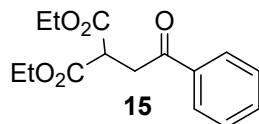

**Diethyl 2-(2-oxo-2-phenylethyl) malonate (15).**  $^1\text{H}$  NMR (300 MHz,  $\text{CDCl}_3$ )  $\delta$  8.05 – 7.93 (m, 2H), 7.66 – 7.54 (m, 1H), 7.50 – 7.39 (m, 2H), 4.33 – 4.15 (m, 4H), 4.06 (t,  $J = 7.1$  Hz, 1H), 3.62 (d,  $J = 7.1$  Hz, 2H), 1.28 (t,  $J = 7.1$  Hz, 6H).  $^{13}\text{C}$  NMR (75 MHz,  $\text{CDCl}_3$ )  $\delta$  196.5, 169.0, 136.1, 133.5, 128.6, 128.1, 61.7, 47.2, 37.7, 14.0.

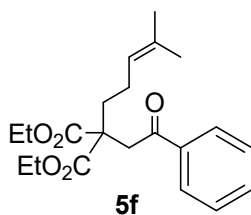

**Diethyl 2-(4-methylpent-3-en-1-yl)-2-(2-oxo-2-phenylethyl) malonate (5f).**  $^1\text{H}$  NMR (300 MHz,  $\text{CDCl}_3$ )  $\delta$  8.15 – 7.83 (m, 1H), 7.63 – 7.53 (m, 1H), 7.52 – 7.41 (m, 2H), 5.03 (t,  $J = 7.1$  Hz, 1H), 4.21 (q,  $J = 7.1$  Hz, 4H), 3.72 (s, 2H), 2.22 – 2.11 (m, 2H), 1.93 (q,  $J = 7.7, 7.1$  Hz, 2H), 1.59 (t,  $J = 1.5$  Hz, 3H), 1.53 (d,  $J = 1.5$  Hz, 3H), 1.25 (td,  $J = 7.1, 1.2$  Hz, 6H).  $^{13}\text{C}$  NMR (75 MHz,  $\text{CDCl}_3$ )  $\delta$  196.7, 171.0, 136.7, 133.3, 132.5, 128.6, 128.0, 123.2, 61.5, 55.3, 41.3, 32.9, 25.5, 23.5, 17.6, 14.2. HRMS (ESI+) calcd. for  $[\text{C}_{21}\text{H}_{28}\text{O}_5 + \text{Na}]$ : 383.1829, found: 383.1821.

### 3. In(III)-catalyzed metathesis/hydroarylation by-reaction from malonates **5a-c**

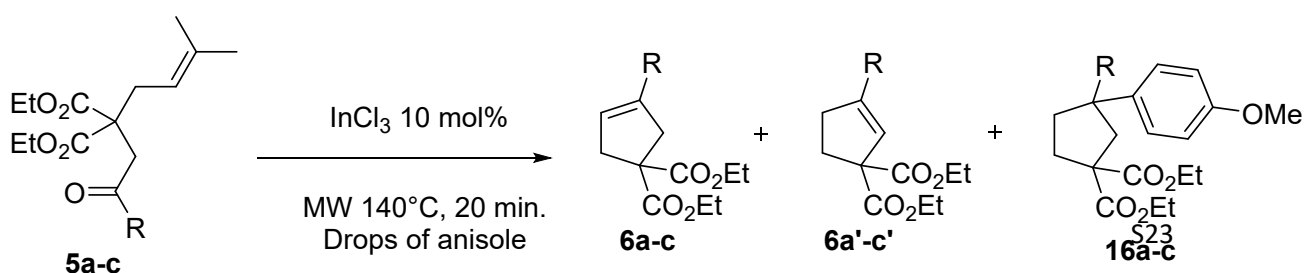

A microwave vessel was charged with compound **5a-c**, InCl<sub>3</sub> (10 mol%) and drops of anisole to facilitate stirring. The reaction mixture was heated to 140 °C in a microwave reactor (holding time 20 min). The reaction mixture was purified by column chromatography eluting with hexane/EtOAc to afford the desired metathesis products (**6a-c** and **6a'-c'**) and product **16a-c**, obtained by hydroarylation of the alkene with anisole.

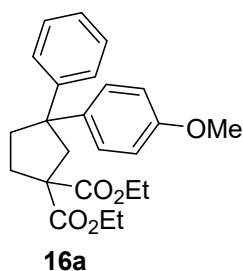

**Diethyl 3-(4-methoxyphenyl)-3-phenylcyclopentane-1,1-dicarboxylate (16a).**

General procedure 3.2.3 was followed with compound **5a** (14 mg, 0.043 mmol). Purification by column chromatography eluting with hexane/EtOAc (95:5) provided products **6a**, **6a'** and **16a** with 95% yield. Specifically, product **16a** was obtained with 52% yield (8.9 mg), as a yellow oil. <sup>1</sup>H NMR (300 MHz, CDCl<sub>3</sub>) δ 7.31 – 7.15 (m, 6H), 7.15 – 7.07 (m, 1H), 6.81 – 6.73 (m, 2H), 4.08 (q, *J* = 7.1 Hz, 4H), 3.74 (s, 3H), 3.23 – 3.04 (m, 2H), 2.47 (t, *J* = 6.8 Hz, 2H), 2.32 (t, *J* = 6.8 Hz, 2H), 1.18 (td, *J* = 7.1, 1.3 Hz, 6H). <sup>13</sup>C NMR (75 MHz, CDCl<sub>3</sub>) δ 172.6, 172.5, 157.8, 147.9, 139.5, 128.4, 128.1, 126.9, 126.0, 113.7, 61.7, 59.6, 55.4, 55.3, 45.6, 38.5, 32.8, 14.2. HRMS (ESI+) calcd. for [C<sub>24</sub>H<sub>28</sub>O<sub>5</sub> + Na]: 419.1825, found: 419.1829.



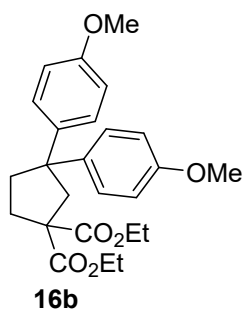

**Diethyl 3,3-bis(4-methoxyphenyl)cyclopentane-1,1-dicarboxylate (16b).** General procedure 3.2.3 was followed with compound **5b** (30.1 mg, 0.087 mmol). Purification by column chromatography eluting with hexane/EtOAc (95:5) provided products **6b**, **6b'** and **16b** with 87% yield. Specifically, product **16b** was obtained with 32% yield (11.85 mg), as a yellow oil.  $^1\text{H NMR}$  (300 MHz,  $\text{CDCl}_3$ )  $\delta$  7.20 – 7.08 (m, 4H), 6.79 – 6.69 (m, 4H), 4.08 (q,  $J = 7.1$  Hz, 4H), 3.75 (s, 6H), 3.10 (s, 2H), 2.44 (t,  $J = 6.7$  Hz, 2H), 2.31 (t,  $J = 6.7$  Hz, 2H), 1.19 (t,  $J = 7.1$  Hz, 6H).  $^{13}\text{C NMR}$  (75 MHz,  $\text{CDCl}_3$ )  $\delta$  172.3, 157.5, 139.7, 127.8, 113.5, 61.5, 59.5, 55.2, 54.5, 45.6, 38.5, 32.6, 13.9. HRMS (ESI+) calcd. for  $[\text{C}_{25}\text{H}_{30}\text{O}_6 + \text{Na}]$ : 449.1935, found: 449.1918.

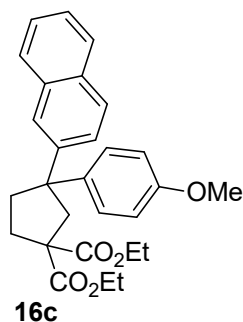

**Diethyl 3-(4-methoxyphenyl)-3-(naphthalen-2-yl)cyclopentane-1,1-dicarboxylate (16c).** General procedure 3.2.3 was followed with compound **5c** (42.5 mg, 0.107 mmol). Purification by column chromatography eluting with hexane/EtOAc (95:5) provided products **6c**, **6c'** and **16c** with 72% yield. Specifically, product **16c** was obtained with 14% yield (6.7 mg), as a yellow oil.  $^1\text{H NMR}$  (300 MHz,  $\text{CDCl}_3$ )  $\delta$  7.84 – 7.63 (m, 5H), 7.51 – 7.36 (m, 2H), 7.23 (d,  $J = 8.8$  Hz, 2H), 6.77 (d,  $J = 8.8$  Hz, 2H), 4.17 – 3.98 (m, 4H), 3.74 (s, 3H), 3.33 – 3.11 (m, 2H), 2.65 – 2.51 (m, 2H), 2.41 – 2.30 (m, 2H), 1.25 –

1.08 (m, 6H).  $^{13}\text{C}$  NMR (75 MHz,  $\text{CDCl}_3$ )  $\delta$  172.3, 157.7, 144.9, 139.1, 133.1, 131.7, 128.1, 127.9, 127.8, 127. 126.4, 125.9, 125.6, 124.1, 113.5, 61.5, 59.5, 55.3, 55.2, 45.3, 38.3, 32.6, 14.0, 13.9. HRMS (ESI+) calcd. for  $[\text{C}_{28}\text{H}_{30}\text{O}_5 + \text{Na}]$ : 469.1985, found: 469.1967.

#### 4. *In Situ* $^1\text{H}$ -NMR Experiment for Intramolecular Carbonyl-Olefin Metathesis

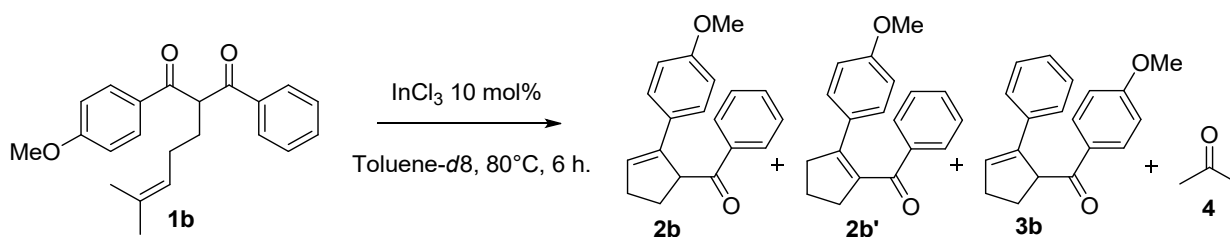

An NMR tube containing  $\text{InCl}_3$  (0.7 mg, 0.0032 mmol) was charged with **1b** (10.9 mg, 0.032 mmol) and  $\text{toluene-}d_8$  (0.5 mL). Then, the reaction mixture was measured in a 400 MHz NMR at regular time points (15 minutes) at  $80^\circ\text{C}$ . An abbreviated series of spectra is shown in the paper, including time points at 0 min., 30 min., 90 min., 3 h, 4.5 h, 6 h. As indicated in the **Figure S1**, the disappearance of **2b** is accompanied by the emergence of **2b'** over time, which confirmed that the direct metathesis product is formed first and this isomerized to give the more stable by conjugation, product **2b'**. The reaction was very clean and completed after ca. 3 h at  $80^\circ\text{C}$ .

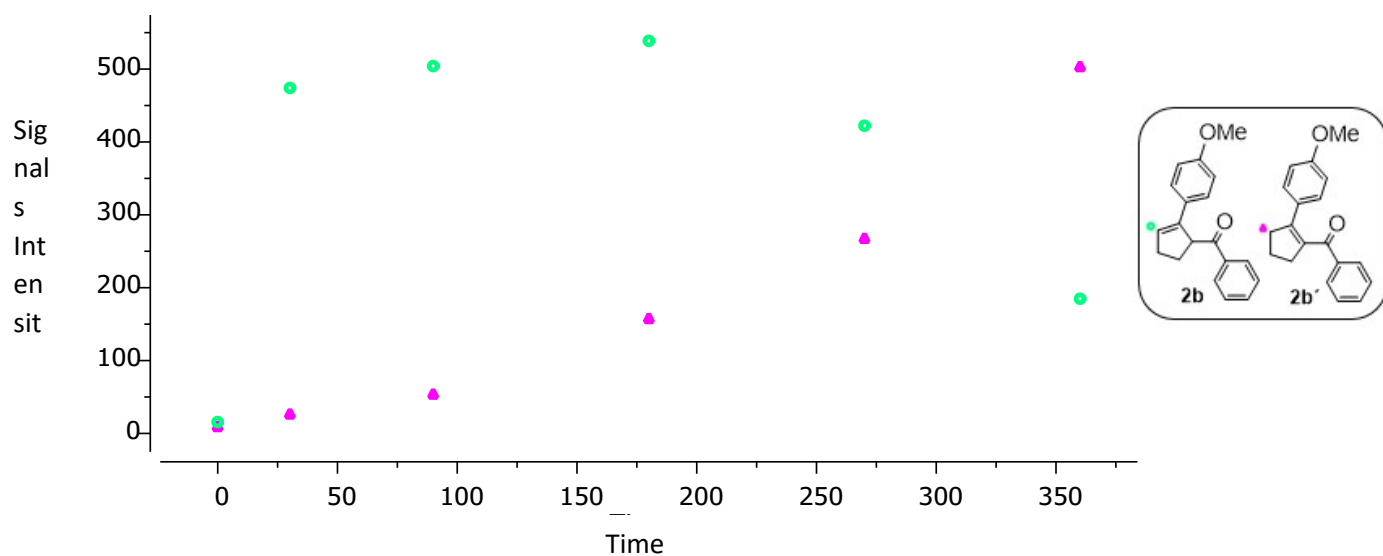

**Figure S1.** Signals intensity of the characteristic protons of **2b** and **2b'** vs reaction time (minutes).

## 5. Computational Details

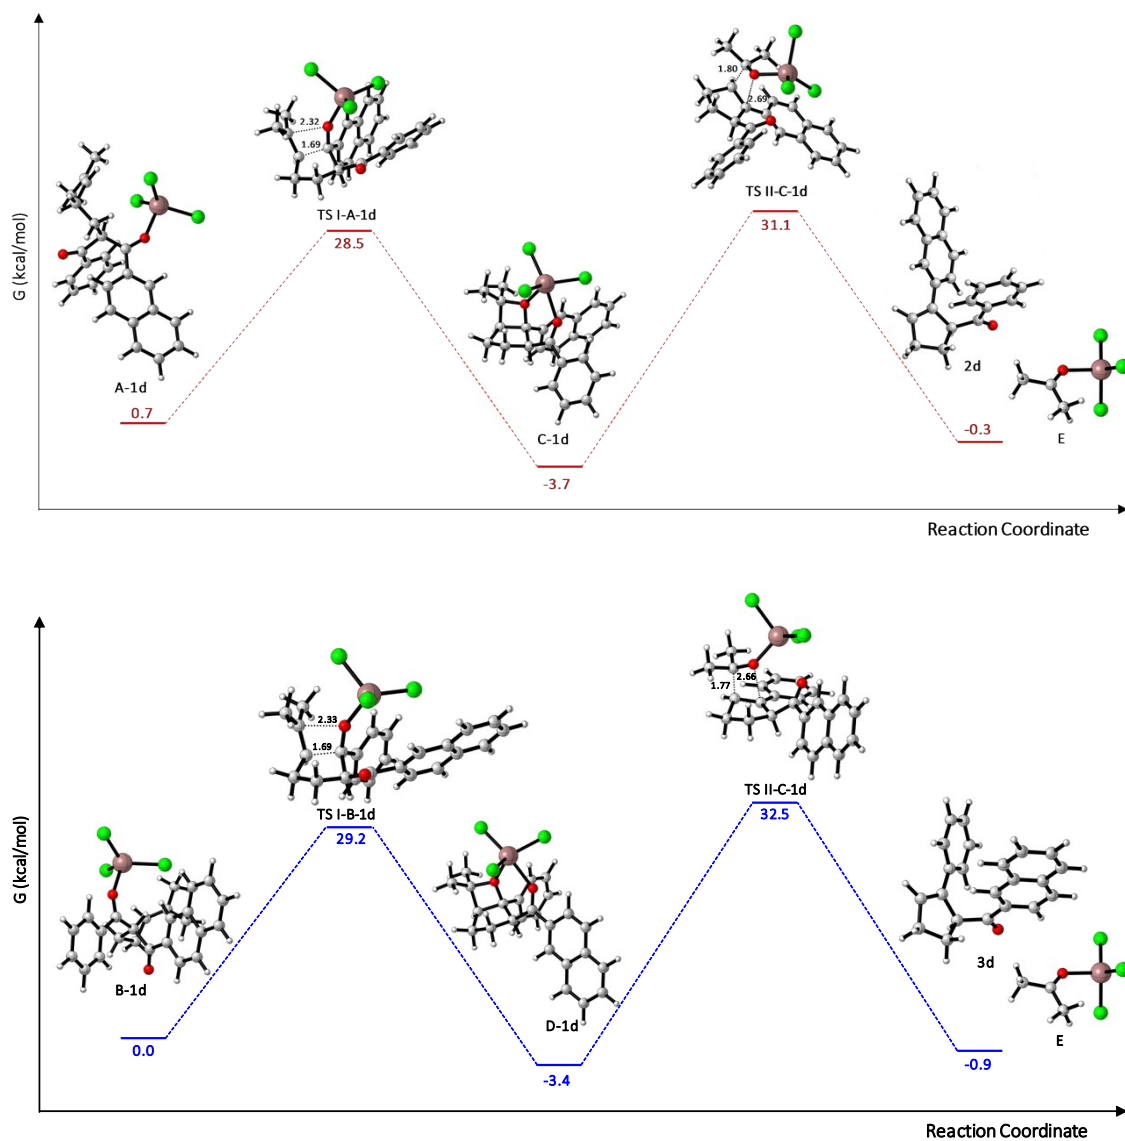

**Figure S2.** Global minima structures found for the **2d** (top) and **3d** (bottom) paths at the M06-2X/6-311+G\*\* level of theory. Gibbs free energies (relative to **B-1d**) and selected distances are given in kcal/mol, and Å, respectively.

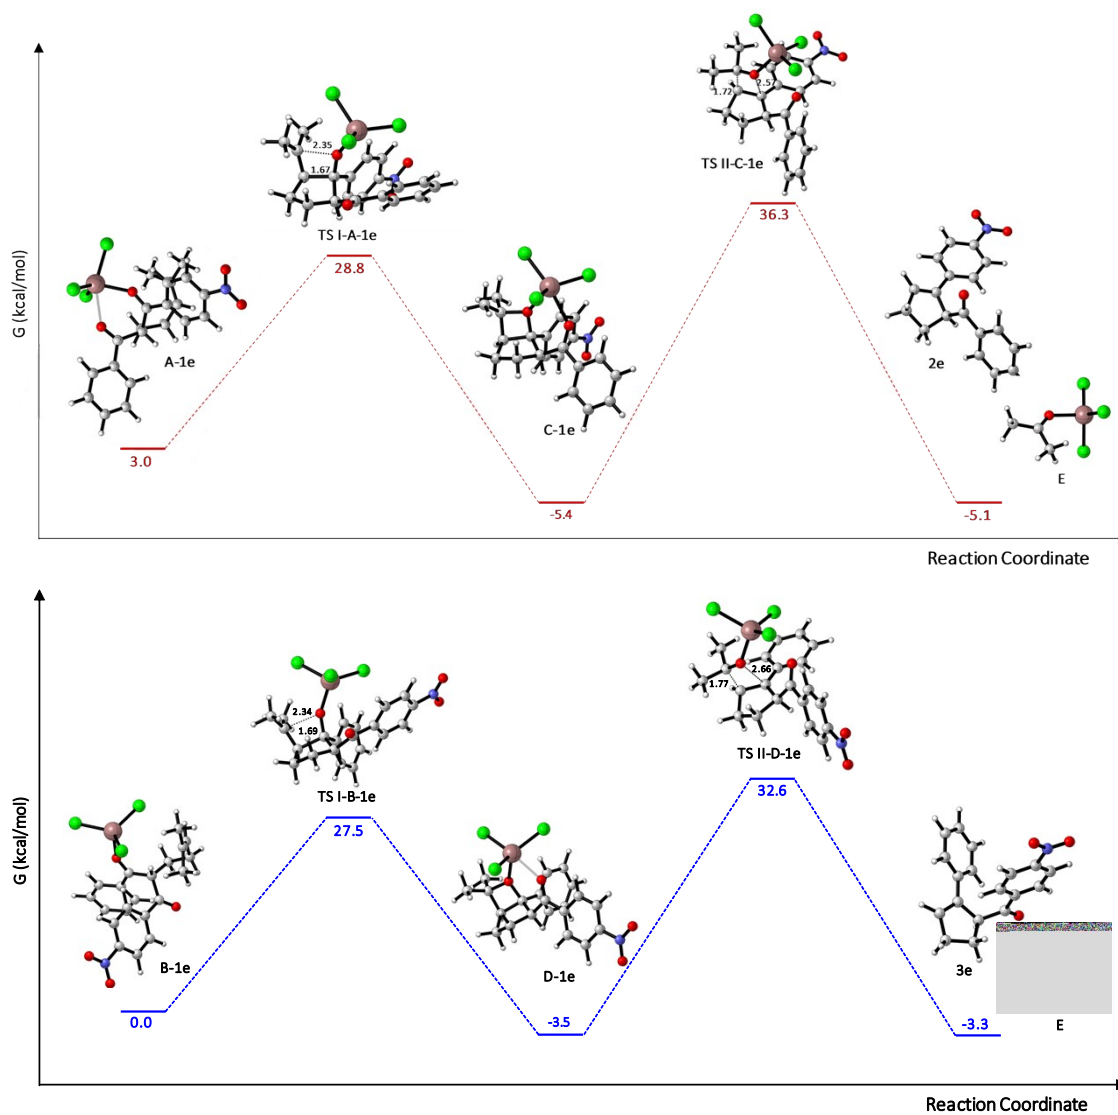

**Figure S3.** Global minima structures found for the **2e** (top) and **3e** (bottom) paths at the M06-2X/6-311+G\*\* level of theory. Gibbs free energies (relative to **B-1e**) and selected distances are given in kcal/mol, and Å, respectively.

**Table S1.** M06-2X/6-31G\* energies (E), zero-point corrected energies (ZPE), enthalpies (H) and Gibbs free energies (G), in au, computed for all structures shown in Figures S1 and S2.

|                  | <b>E</b>     | <b>ZPE</b>   | <b>H</b>     | <b>G</b>     |
|------------------|--------------|--------------|--------------|--------------|
| <b>A_1d</b>      | -2500.064873 | -2499.634687 | -2499.601968 | -2499.702741 |
| <b>TS_IA_1d</b>  | -2500.023655 | -2499.595599 | -2499.564310 | -2499.658372 |
| <b>C_1d</b>      | -2500.080871 | -2499.647172 | -2499.616576 | -2499.709787 |
| <b>TS_IIC_1d</b> | -2500.022632 | -2499.592454 | -2499.561814 | -2499.654277 |
| <b>2d</b>        | -924.251419  | -923.913654  | -923.894716  | -923.961661  |
| <b>B_1d</b>      | -2500.066669 | -2499.636193 | -2499.603582 | -2499.703864 |
| <b>TS_IB_1d</b>  | -2500.021417 | -2499.593856 | -2499.562343 | -2499.657295 |
| <b>D_1d</b>      | -2500.079922 | -2499.646322 | -2499.615772 | -2499.709207 |
| <b>TS_IID_1d</b> | -2500.020170 | -2499.590337 | -2499.559700 | -2499.652137 |
| <b>3d</b>        | -924.252303  | -923.914589  | -923.895640  | -923.962558  |
| <b>A_1e</b>      | -2550.927859 | -2550.542102 | -2550.509544 | -2550.611194 |
| <b>TS_IA_1e</b>  | -2550.890320 | -2550.506281 | -2550.475059 | -2550.570043 |
| <b>C_1e</b>      | -2550.949794 | -2550.560497 | -2550.529975 | -2550.624589 |
| <b>TS_IIC_1e</b> | -2550.881917 | -2550.495708 | -2550.465289 | -2550.558046 |
| <b>2e</b>        | -975.125503  | -974.832248  | -974.813315  | -974.881299  |
| <b>B_1e</b>      | -2550.932653 | -2550.546926 | -2550.514161 | -2550.615930 |
| <b>TS_IB_1e</b>  | -2550.892375 | -2550.508739 | -2550.477473 | -2550.572044 |
| <b>D_1e</b>      | -2550.946350 | -2550.557399 | -2550.526789 | -2550.621478 |
| <b>TS_IID_1e</b> | -2550.888133 | -2550.501739 | -2550.471263 | -2550.563973 |
| <b>3e</b>        | -975.123365  | -974.829781  | -974.810914  | -974.878500  |
| <b>E</b>         | -1575.789197 | -1575.700080 | -1575.686411 | -1575.742708 |

## Cartesian Coordinates

### 2d

C -2.066797 -1.509808 0.660446  
C -3.208817 -2.010488 -0.256949  
C -2.538099 -3.045853 -1.184106  
C -1.087957 -2.637766 -1.155273  
C -0.819207 -1.771504 -0.173161  
C 0.487480 -1.181256 0.161669  
C 2.986099 -0.060183 0.860802  
C 0.787649 -0.847510 1.512795  
C 1.426442 -0.925812 -0.812108  
C 2.688616 -0.370239 -0.493752  
C 2.000095 -0.311250 1.848956  
C -2.278712 -0.093921 1.186284  
O -2.554504 0.060651 2.355376  
C -2.170623 1.100445 0.278698  
C -1.993400 3.412218 -1.278430  
C -2.355626 2.360494 0.855985  
C -1.894998 1.011297 -1.088198  
C -1.809519 2.163980 -1.861800  
C -2.266102 3.509168 0.084078  
C 3.666407 -0.105941 -1.489168  
C 4.879348 0.432269 -1.152212  
C 5.175905 0.737649 0.198416  
C 4.250648 0.497408 1.179141  
H -2.024409 -2.127910 1.564589  
H -3.595524 -1.178928 -0.850875  
H -4.039266 -2.419808 0.317864  
H -2.963506 -3.044226 -2.190709  
H -2.651175 -4.064456 -0.794511  
H -0.340788 -3.058825 -1.818383  
H 0.047134 -1.028241 2.284367  
H 1.195799 -1.133957 -1.852647  
H 2.221320 -0.067276 2.882651  
H -1.924112 4.309170 -1.882998  
H -2.567903 2.413341 1.916800  
H -1.738090 0.049042 -1.557293  
H -1.595001 2.085543 -2.920849  
H -2.407723 4.481067 0.541877  
H 3.435820 -0.341472 -2.522921  
H 5.619764 0.626293 -1.919284  
H 6.139455 1.163716 0.451290  
H 4.471256 0.731343 2.215348

SCF Energy (M06-2X/6-311+G\*\*)= -924.251418870

Gibbs Energy (M06-2X/6-311+G\*\*)= -923.961661

Number of imaginary frequencies = 0

### 2e

C -1.174608 1.183672 -0.526998

C -2.034131 2.461983 -0.723190  
C -1.374684 3.507464 0.196205  
C 0.041764 3.012519 0.301449  
C 0.167133 1.745077 -0.103657  
C 1.388298 0.927287 -0.096950  
C 3.685331 -0.625264 -0.084888  
C 2.656602 1.523318 -0.037901  
C 1.309147 -0.469017 -0.164844  
C 2.453389 -1.253821 -0.156127  
C 3.808194 0.756666 -0.026166  
C -1.799301 0.323099 0.572968  
O -1.418707 0.396328 1.716898  
C -2.933332 -0.589135 0.198766  
C -5.038823 -2.321353 -0.385757  
C -3.429747 -1.451719 1.179813  
C -3.503875 -0.598575 -1.075869  
C -4.555918 -1.460521 -1.365404  
C -4.474125 -2.316655 0.887683  
H -1.101240 0.598155 -1.446598  
H -3.090436 2.300989 -0.500345  
H -1.952277 2.782524 -1.764022  
H -1.836723 3.515869 1.190194  
H -1.447954 4.521273 -0.203199  
H 0.839632 3.610156 0.725906  
H 2.740822 2.602803 -0.017859  
H 0.343504 -0.958357 -0.212799  
H 2.403228 -2.333237 -0.201182  
H 4.791336 1.205187 0.018184  
H -5.855884 -2.995744 -0.613799  
H -2.979176 -1.426238 2.164825  
H -3.142748 0.070920 -1.847652  
H -4.997129 -1.460133 -2.354707  
H -4.851069 -2.987722 1.650140  
N 4.908024 -1.449285 -0.081555  
O 5.973215 -0.871872 -0.030607  
O 4.774501 -2.653405 -0.130165

SCF Energy (M06-2X/6-311+G\*\*)= -975.125503207

Gibbs Energy (M06-2X/6-311+G\*\*)= -974.881299

Number of imaginary frequencies = 0

### 3d

C 1.909834 -1.701745 0.152982  
C 1.571181 -2.843596 -0.835267  
C 2.250746 -2.429956 -2.156846  
C 2.370391 -0.934123 -2.020677  
C 2.157608 -0.515095 -0.769067  
C 2.218868 0.869269 -0.270246  
C 2.335008 3.499627 0.687090  
C 2.572086 1.128996 1.058015  
C 1.905455 1.947596 -1.105516



C 1.966809 3.251121 -0.632606  
 C 2.635107 2.435460 1.529844  
 C 0.880435 -1.538686 1.267165  
 O 1.183993 -1.863747 2.394308  
 C -0.501490 -1.020137 0.991873  
 C -3.127607 -0.046840 0.662021  
 C -0.915753 -0.577713 -0.242513  
 C -1.406858 -0.982175 2.088434  
 C -2.678146 -0.512686 1.927253  
 C -2.229588 -0.080854 -0.436640  
 C -2.667760 0.386144 -1.702874  
 C -3.941076 0.862793 -1.868448  
 C -4.836120 0.895115 -0.773190  
 C -4.439163 0.451270 0.461203  
 H 2.840490 -1.934918 0.683053  
 H 0.489016 -2.893372 -0.978552  
 H 1.901953 -3.813188 -0.463486  
 H 1.677685 -2.735732 -3.035650  
 H 3.245466 -2.880733 -2.255033  
 H 2.665297 -0.287844 -2.839642  
 H 2.376231 4.516706 1.058068  
 H 2.805541 0.307158 1.726334  
 H 1.591220 1.755530 -2.125770  
 H 1.714383 4.074993 -1.289761  
 H 2.914408 2.620442 2.560315  
 H -0.246895 -0.589341 -1.094405  
 H -1.054544 -1.334335 3.049756  
 H -3.364604 -0.486264 2.766732  
 H -1.974670 0.359197 -2.537140  
 H -4.268867 1.217805 -2.838124  
 H -5.840817 1.275175 -0.915816  
 H -5.123044 0.475992 1.302721

SCF Energy (M06-2X/6-311+G\*\*)= -924.252302533

Gibbs Energy (M06-2X/6-311+G\*\*)= -923.962558

Number of imaginary frequencies = 0

### 3e

C 1.962001 -1.594315 0.458092  
 C 1.852449 -2.870529 -0.411528  
 C 2.717018 -2.569302 -1.653521  
 C 2.739167 -1.063321 -1.694262  
 C 2.300073 -0.511959 -0.558127  
 C 2.204259 0.921612 -0.234349  
 C 2.014843 3.645178 0.396395  
 C 2.284566 1.353421 1.093671  
 C 2.011526 1.875878 -1.240327  
 C 1.921891 3.225199 -0.928184  
 C 2.195096 2.705793 1.405006  
 C 0.746234 -1.379038 1.347674  
 O 0.830638 -1.598072 2.533639

C -0.577356 -0.924113 0.776152  
 C -3.047169 -0.080216 -0.105743  
 C -1.615503 -0.706924 1.686739  
 C -0.800574 -0.712752 -0.586741  
 C -2.044158 -0.288147 -1.037202  
 C -2.860947 -0.281254 1.254112  
 H 2.795783 -1.695854 1.162006  
 H 0.813441 -3.023190 -0.715050  
 H 2.169184 -3.759387 0.133352  
 H 2.310820 -3.015873 -2.564154  
 H 3.734746 -2.959291 -1.536423  
 H 3.134118 -0.502486 -2.533616  
 H 2.430011 0.631976 1.890603  
 H 1.911926 1.550665 -2.270129  
 H 1.767714 3.951406 -1.717587  
 H 2.264532 3.024330 2.438268  
 H -1.423992 -0.876745 2.738653  
 H -0.010767 -0.869490 -1.308349  
 H -2.241454 -0.116532 -2.086400  
 H -3.676389 -0.104772 1.942042  
 H 1.938312 4.698160 0.639347  
 N -4.373192 0.375487 -0.582935  
 O -5.240035 0.536231 0.247067  
 O -4.506370 0.557766 -1.773100  
 SCF Energy (M06-2X/6-311+G\*\*)= -975.123365409  
 Gibbs Energy (M06-2X/6-311+G\*\*)= -974.878500  
 Number of imaginary frequencies = 0

**A\_1d**

C 4.045592 0.753232 -1.667162  
 C 4.777986 -0.273973 -1.014566  
 C 4.077476 -1.224347 -0.221187  
 C 2.676528 -1.121288 -0.110457  
 C 1.986201 -0.103089 -0.741341  
 C 2.689854 0.849159 -1.533479  
 C 0.529336 -0.058793 -0.561549  
 O -0.026413 -1.064785 -0.089515  
 C -0.313894 1.122197 -0.971020  
 C 0.308590 2.486766 -0.627266  
 O 0.513673 3.303353 -1.493772  
 C 0.642533 2.767096 0.799744  
 C 1.420809 3.894388 1.080606  
 C 0.205166 1.949079 1.843211  
 C 0.542740 2.256436 3.156712  
 C 1.325825 3.372193 3.428922  
 C 1.764582 4.192083 2.389882  
 C -0.676837 0.994997 -2.466537  
 C -1.899193 1.862081 -2.822838  
 C -3.162050 1.380810 -2.163776  
 C -3.721210 1.851977 -1.043958

C -5.012865 1.278390 -0.524974  
 C -3.156442 2.974749 -0.213993  
 In -1.886768 -1.893405 0.424229  
 Cl -2.902012 -2.156963 -1.637740  
 Cl -1.156350 -3.792044 1.516292  
 Cl -2.722607 -0.218311 1.815115  
 C 4.800588 -2.255896 0.435652  
 C 6.159750 -2.336621 0.305905  
 C 6.857059 -1.390509 -0.484246  
 C 6.185660 -0.384896 -1.128888  
 H 4.582865 1.467804 -2.280351  
 H 2.131102 -1.845555 0.484891  
 H 2.159921 1.637767 -2.050266  
 H -1.246236 1.043177 -0.395729  
 H 1.744148 4.520778 0.257947  
 H -0.429133 1.091331 1.657615  
 H 0.186745 1.625616 3.962071  
 H 1.591299 3.608939 4.452765  
 H 2.371824 5.062667 2.606699  
 H 0.180530 1.288978 -3.075589  
 H -0.908528 -0.052753 -2.683964  
 H -1.681502 2.903284 -2.583925  
 H -2.025565 1.810532 -3.907856  
 H -3.651192 0.542544 -2.653751  
 H -4.926791 1.023598 0.534250  
 H -5.814998 2.018604 -0.616859  
 H -5.302464 0.382753 -1.076910  
 H -2.295293 3.464131 -0.671149  
 H -3.921653 3.736230 -0.035008  
 H -2.857113 2.593327 0.769758  
 H 4.254451 -2.975027 1.035931  
 H 6.709132 -3.124522 0.806446  
 H 7.934009 -1.467088 -0.577566  
 H 6.721786 0.338300 -1.733088

SCF Energy (M06-2X/6-311+G\*\*)= -2500.06487325

Gibbs Energy (M06-2X/6-311+G\*\*)= -2499.702741

Number of imaginary frequencies = 0

#### A\_1e

C 4.080616 1.622865 -0.047581  
 C 4.636277 0.613089 -0.818048  
 C 3.925017 -0.504023 -1.225051  
 C 2.597899 -0.612728 -0.838245  
 C 2.005646 0.388418 -0.060309  
 C 2.751983 1.504656 0.329097  
 C 0.576303 0.193170 0.314377  
 O 0.044224 -0.859346 -0.028381  
 C -0.248145 1.276698 0.970590  
 C -1.430882 1.611505 0.051748  
 O -2.020476 0.727273 -0.534273

C -1.878938 3.021268 -0.074287  
 C -2.770586 3.317031 -1.110656  
 C -1.467256 4.029602 0.801283  
 C -1.945271 5.323687 0.640629  
 C -2.818705 5.616501 -0.402450  
 C -3.228957 4.614412 -1.278491  
 C -0.867271 0.817366 2.319106  
 C 0.179748 0.694364 3.434857  
 C 1.348758 -0.170633 3.035135  
 C 1.288194 -1.485055 2.783158  
 C 2.471389 -2.225335 2.231158  
 C 0.049196 -2.314321 2.952333  
 In -1.822459 -1.724223 -0.712682  
 Cl -2.165052 -1.190996 -2.945257  
 Cl -0.725058 -3.808441 -0.609736  
 Cl -3.371397 -1.648338 1.030790  
 N 6.059279 0.737474 -1.221932  
 O 6.655869 1.723346 -0.851171  
 O 6.524613 -0.154230 -1.892692  
 H 4.683946 2.471954 0.242735  
 H 4.407774 -1.262148 -1.826681  
 H 2.007499 -1.472670 -1.132650  
 H 2.319990 2.282991 0.943873  
 H 0.355904 2.165858 1.127961  
 H -3.083268 2.518849 -1.773595  
 H -0.799257 3.813544 1.627136  
 H -1.637473 6.102305 1.327445  
 H -3.183444 6.628695 -0.530854  
 H -3.908848 4.845639 -2.089028  
 H -1.643557 1.533722 2.605825  
 H -1.371963 -0.135502 2.147269  
 H 0.538205 1.691803 3.706202  
 H -0.322540 0.295986 4.321792  
 H 2.305208 0.327397 2.896898  
 H 2.757838 -3.052944 2.886351  
 H 2.197844 -2.670309 1.265771  
 H 3.334472 -1.571780 2.089059  
 H 0.290885 -3.234992 3.490634  
 H -0.749711 -1.802335 3.487787  
 H -0.332261 -2.630842 1.974504  
 SCF Energy (M06-2X/6-311+G\*\*)= -2550.92785853  
 Gibbs Energy (M06-2X/6-311+G\*\*)= -2550.611194  
 Number of imaginary frequencies = 0

**B\_1d**

C 2.057415 4.630842 0.187356  
 C 2.097769 4.979790 -1.158724  
 C 1.420204 4.214853 -2.106798  
 C 0.701484 3.101143 -1.708034  
 C 0.670648 2.733866 -0.354519

C 1.352071 3.506799 0.594287  
C -0.105786 1.540639 0.017062  
O -0.877187 1.071552 -0.834950  
C -0.049881 0.909275 1.384787  
C 1.369803 0.792728 1.972656  
O 1.645400 1.340043 3.014723  
C 2.376687 -0.015300 1.232922  
C 2.040823 -0.775979 0.137553  
C 3.721742 0.007326 1.695300  
C 4.682612 -0.714949 1.049351  
C 4.361296 -1.510156 -0.086190  
C 3.017270 -1.543431 -0.543129  
C -1.017457 1.655570 2.329443  
C -1.385687 0.788252 3.548067  
C -2.198348 -0.418660 3.170543  
C -1.760314 -1.669308 2.990240  
C -2.715508 -2.775415 2.628319  
C -0.325135 -2.103453 3.133468  
In -2.329934 -0.408387 -1.192139  
Cl -4.061941 0.240061 0.194699  
Cl -2.584584 -0.127799 -3.468113  
Cl -1.135541 -2.318990 -0.581159  
C 2.676980 -2.346408 -1.662112  
C 3.641105 -3.075956 -2.305723  
C 4.982475 -3.036861 -1.857590  
C 5.335169 -2.274428 -0.773988  
H 2.576486 5.233017 0.922306  
H 2.658100 5.853479 -1.470956  
H 1.452579 4.490711 -3.153484  
H 0.163695 2.499224 -2.430328  
H 1.325420 3.252554 1.645341  
H -0.433643 -0.111855 1.260624  
H 1.020787 -0.842863 -0.220325  
H 3.956849 0.607898 2.565299  
H 5.710022 -0.695358 1.396674  
H -0.556630 2.588068 2.660974  
H -1.930398 1.901777 1.777403  
H -0.475627 0.522414 4.086288  
H -1.976046 1.414290 4.222976  
H -3.255815 -0.230184 3.002116  
H -2.362861 -3.318581 1.747733  
H -2.784242 -3.497369 3.449024  
H -3.714204 -2.387350 2.422171  
H 0.336104 -1.317361 3.500810  
H -0.253482 -2.952383 3.820271  
H 0.054830 -2.450640 2.165293  
H 1.642749 -2.375600 -1.988697  
H 3.379391 -3.688492 -3.160017  
H 5.734874 -3.618769 -2.376718  
H 6.362628 -2.248748 -0.427716

SCF Energy (M06-2X/6-311+G\*\*)= -2500.06666854  
Gibbs Energy (M06-2X/6-311+G\*\*)= -2499.703864  
Number of imaginary frequencies = 0

**B\_1e**

|    |           |           |           |
|----|-----------|-----------|-----------|
| C  | 2.174639  | 4.019986  | 1.884951  |
| C  | 2.182825  | 4.889644  | 0.798760  |
| C  | 1.443228  | 4.597596  | -0.346298 |
| C  | 0.692802  | 3.435951  | -0.404270 |
| C  | 0.692865  | 2.547090  | 0.680627  |
| C  | 1.437745  | 2.844964  | 1.829236  |
| C  | -0.125236 | 1.330023  | 0.569339  |
| O  | -0.952343 | 1.275458  | -0.351839 |
| C  | -0.040905 | 0.183755  | 1.548586  |
| C  | 1.387196  | -0.185250 | 1.972212  |
| O  | 1.710866  | -0.179488 | 3.134413  |
| C  | 2.372157  | -0.567348 | 0.907788  |
| C  | 3.713563  | -0.686110 | 1.282466  |
| C  | 1.989999  | -0.802963 | -0.413190 |
| C  | 2.940710  | -1.156094 | -1.363369 |
| C  | 4.261572  | -1.253405 | -0.961833 |
| C  | 4.673129  | -1.027751 | 0.344856  |
| C  | -0.958596 | 0.473848  | 2.756508  |
| C  | -1.316300 | -0.822389 | 3.508362  |
| C  | -2.174451 | -1.742015 | 2.685078  |
| C  | -1.779172 | -2.801466 | 1.971214  |
| C  | -2.777849 | -3.633025 | 1.211145  |
| C  | -0.353468 | -3.274983 | 1.858993  |
| In | -2.474601 | 0.113840  | -1.246874 |
| Cl | -4.126321 | 0.144806  | 0.368590  |
| Cl | -2.808660 | 1.344547  | -3.164960 |
| Cl | -1.277839 | -1.868390 | -1.532484 |
| N  | 5.285384  | -1.618201 | -1.971645 |
| O  | 6.433062  | -1.697554 | -1.594180 |
| O  | 4.906131  | -1.809509 | -3.104334 |
| H  | 2.741048  | 4.257520  | 2.776659  |
| H  | 2.766518  | 5.801668  | 0.844088  |
| H  | 1.451475  | 5.277912  | -1.188535 |
| H  | 0.104773  | 3.196217  | -1.281956 |
| H  | 1.430298  | 2.185034  | 2.686661  |
| H  | -0.455249 | -0.689524 | 1.025580  |
| H  | 3.984912  | -0.506661 | 2.315342  |
| H  | 0.953120  | -0.753689 | -0.720598 |
| H  | 2.668406  | -1.357813 | -2.390674 |
| H  | 5.719268  | -1.121999 | 0.601972  |
| H  | -0.465520 | 1.176762  | 3.431252  |
| H  | -1.880151 | 0.938369  | 2.391115  |
| H  | -0.400428 | -1.306280 | 3.848573  |
| H  | -1.868399 | -0.532843 | 4.406636  |
| H  | -3.231135 | -1.487921 | 2.658103  |

H -2.450396 -3.784186 0.179659  
 H -2.871891 -4.622753 1.670509  
 H -3.761346 -3.160679 1.198620  
 H 0.335817 -2.743838 2.517333  
 H -0.288865 -4.341469 2.094701  
 H -0.006993 -3.162540 0.824371  
 SCF Energy (M06-2X/6-311+G\*\*)= -2550.93265301  
 Gibbs Energy (M06-2X/6-311+G\*\*)= -2550.615930  
 Number of imaginary frequencies = 0

**C\_1d**

C 2.616238 0.397099 2.103360  
 C 1.655367 -0.134981 1.201249  
 C 2.064172 -0.655409 0.002668  
 C 3.437531 -0.664383 -0.355873  
 C 4.396301 -0.139090 0.549394  
 C 3.946255 0.390630 1.788050  
 C 0.205366 -0.065160 1.592711  
 C -0.394053 1.346961 1.525531  
 C -1.672063 1.251433 2.382908  
 C -1.216761 0.368313 3.557077  
 C -0.238580 -0.649769 2.958510  
 C -0.839597 -1.827189 2.156485  
 C 0.052795 -3.051411 2.159298  
 O -0.614432 -1.052056 0.894696  
 In -1.562246 -1.134493 -1.057922  
 Cl -1.764269 -3.490453 -0.868127  
 C -2.297782 -2.162008 2.366574  
 Cl -0.261825 -0.935673 -3.000750  
 Cl -3.690293 -0.246967 -0.616346  
 C -0.631378 1.835025 0.119893  
 O -0.863881 1.032704 -0.773363  
 C -0.600220 3.280315 -0.197884  
 C -0.497704 4.259280 0.794083  
 C -0.694490 3.655254 -1.542582  
 C -0.674449 4.997013 -1.887937  
 C -0.574129 5.970070 -0.895429  
 C -0.490218 5.603172 0.444062  
 C 3.870680 -1.188558 -1.600579  
 C 5.202317 -1.194700 -1.921341  
 C 6.160315 -0.679256 -1.016026  
 C 5.767639 -0.162815 0.190627  
 H 2.287564 0.797196 3.058384  
 H 1.357191 -1.075022 -0.703524  
 H 4.676829 0.787202 2.485101  
 H 0.326355 2.003504 2.022875  
 H -2.036355 2.228903 2.701605  
 H -2.462668 0.774623 1.797897  
 H -0.683974 0.982387 4.288910  
 H -2.052745 -0.104169 4.075109

H 0.558396 -0.949598 3.637808  
 H -0.010241 -3.527831 3.141466  
 H -0.274042 -3.758911 1.397080  
 H 1.092086 -2.774045 1.971113  
 H -2.415096 -2.556619 3.379866  
 H -2.947192 -1.293888 2.252574  
 H -2.618706 -2.929153 1.660795  
 H -0.435095 3.983351 1.840110  
 H -0.777331 2.880263 -2.295507  
 H -0.739162 5.288081 -2.929076  
 H -0.561601 7.019090 -1.167694  
 H -0.415950 6.362311 1.212867  
 H 3.127312 -1.576564 -2.289142  
 H 5.529420 -1.594243 -2.873773  
 H 7.210251 -0.693696 -1.283943  
 H 6.498562 0.235388 0.886438  
 SCF Energy (M06-2X/6-311+G\*\*)= -2500.08087066  
 Gibbs Energy (M06-2X/6-311+G\*\*)= -2499.709787  
 Number of imaginary frequencies = 0

**C\_1e**

C 2.929041 0.283549 1.500152  
 C 1.851530 -0.277515 0.807702  
 C 2.066330 -0.880143 -0.429547  
 C 3.341054 -0.910014 -0.983455  
 C 4.384198 -0.339815 -0.275703  
 C 4.206113 0.256236 0.964830  
 C 0.477699 -0.174963 1.416974  
 C -0.076878 1.256500 1.462539  
 C -1.205269 1.189492 2.511255  
 C -0.605900 0.269238 3.587109  
 C 0.228639 -0.769508 2.828704  
 C -0.530369 -1.911902 2.111861  
 C 0.303903 -3.168132 1.975077  
 O -0.459302 -1.126682 0.837512  
 In -1.683901 -1.139752 -0.978487  
 Cl -1.959344 -3.481966 -0.756297  
 C -1.955849 -2.192159 2.524534  
 Cl -0.659631 -0.960134 -3.070541  
 Cl -3.653940 -0.133253 -0.197343  
 C -0.532064 1.784189 0.126627  
 O -0.826544 1.001598 -0.765407  
 C -0.667266 3.239638 -0.101264  
 C -0.358601 4.182276 0.884099  
 C -1.141797 3.663725 -1.347776  
 C -1.300269 5.016376 -1.603150  
 C -0.991264 5.951621 -0.617828  
 C -0.522730 5.536338 0.625077  
 N 5.743863 -0.368855 -0.857568  
 O 6.631380 0.160214 -0.223817



O 5.882139 -0.916979 -1.927122  
H 2.771732 0.737936 2.473621  
H 1.253406 -1.334276 -0.980450  
H 3.523768 -1.365438 -1.947715  
H 5.054823 0.680637 1.483564  
H 0.731701 1.885121 1.848264  
H -1.475266 2.174138 2.893956  
H -2.096951 0.756100 2.051259  
H 0.056323 0.850660 4.235166  
H -1.366537 -0.186163 4.222896  
H 1.109418 -1.108999 3.372586  
H 0.354075 -3.663869 2.948323  
H -0.147341 -3.846781 1.251588  
H 1.321030 -2.928001 1.657565  
H -1.948670 -2.572837 3.549680  
H -2.581403 -1.300361 2.484067  
H -2.396119 -2.952088 1.878245  
H 0.004724 3.871007 1.856140  
H -1.378330 2.918134 -2.097437  
H -1.665971 5.345348 -2.567882  
H -1.117301 7.008975 -0.819061  
H -0.286362 6.266255 1.389330  
SCF Energy (M06-2X/6-311+G\*\*)= -2550.94979444  
Gibbs Energy (M06-2X/6-311+G\*\*)= -2550.624589  
Number of imaginary frequencies = 0

**D\_1d**

C 0.285638 3.722362 -0.385379  
C 0.836224 2.445399 -0.517532  
C 1.357374 2.049219 -1.745809  
C 1.320572 2.919815 -2.831433  
C 0.771465 4.188956 -2.696789  
C 0.254341 4.591136 -1.468032  
C 0.809097 1.523196 0.672513  
C -0.584034 0.971156 1.007344  
C -0.456230 0.481495 2.463810  
C 0.416250 1.572375 3.106356  
C 1.404827 2.009733 2.019269  
C 2.600674 1.074155 1.723403  
C 3.797841 1.815230 1.165261  
O 1.823134 0.475545 0.592792  
In 1.928012 -1.472605 -0.382741  
Cl 4.290053 -1.451621 -0.160847  
C 2.974741 0.045308 2.764265  
Cl 1.669111 -1.692878 -2.699015  
Cl 1.106168 -2.886873 1.302639  
C -1.066597 -0.092049 0.055267  
O -0.255412 -0.781602 -0.547668  
C -2.509676 -0.346907 -0.137403  
C -3.473090 0.339341 0.567211

C -2.887017 -1.359627 -1.063298  
 C -4.205221 -1.650083 -1.257678  
 C -5.220533 -0.958313 -0.541304  
 C -4.846462 0.050922 0.386381  
 C -5.855373 0.743897 1.104649  
 C -7.176848 0.445164 0.909248  
 C -7.549488 -0.559949 -0.014369  
 C -6.596166 -1.243876 -0.722571  
 H -0.108556 4.044513 0.574656  
 H 1.798371 1.068747 -1.875839  
 H 1.725640 2.596708 -3.782751  
 H 0.749196 4.864817 -3.543058  
 H -0.168122 5.582211 -1.352124  
 H -1.259504 1.831065 0.974464  
 H -1.425842 0.367853 2.950369  
 H 0.037028 -0.493917 2.474361  
 H -0.210157 2.426901 3.378432  
 H 0.913719 1.230324 4.015158  
 H 1.680867 3.062085 2.071228  
 H 4.285919 2.360093 1.977877  
 H 4.506513 1.111121 0.729127  
 H 3.486901 2.531376 0.401549  
 H 3.376285 0.570053 3.635781  
 H 2.122078 -0.556300 3.079656  
 H 3.745957 -0.623365 2.379541  
 H -3.206268 1.111042 1.281291  
 H -2.105644 -1.883052 -1.600405  
 H -4.498106 -2.419677 -1.963209  
 H -5.561298 1.513807 1.810017  
 H -7.943724 0.976450 1.459669  
 H -8.598842 -0.787007 -0.160057  
 H -6.881278 -2.014738 -1.429874

SCF Energy (M06-2X/6-311+G\*\*)= -2500.07992217

Gibbs Energy (M06-2X/6-311+G\*\*)= -2499.709207

Number of imaginary frequencies = 0

#### D<sub>1e</sub>

C 0.349470 3.738314 -0.254713  
 C 0.842293 2.446272 -0.452811  
 C 1.238772 2.052555 -1.727434  
 C 1.135596 2.941215 -2.794330  
 C 0.645184 4.225288 -2.594033  
 C 0.252787 4.624681 -1.318770  
 C 0.896320 1.508169 0.723962  
 C -0.481801 1.038533 1.214641  
 C -0.216948 0.511505 2.639840  
 C 0.788983 1.537778 3.187701  
 C 1.671496 1.933349 1.998079  
 C 2.765922 0.934142 1.556055  
 C 3.933165 1.617029 0.873648

O 1.825657 0.401792 0.514927  
 In 1.734284 -1.534192 -0.477520  
 Cl 4.096531 -1.650317 -0.525358  
 C 3.196090 -0.132896 2.535027  
 Cl 1.167883 -1.653556 -2.741912  
 Cl 0.988270 -2.911206 1.267876  
 C -1.137789 0.034131 0.307167  
 O -0.461716 -0.718439 -0.371549  
 C -2.621857 -0.074734 0.234498  
 C -3.459032 0.612112 1.115603  
 C -3.162361 -0.912449 -0.745692  
 C -4.535769 -1.058016 -0.854243  
 C -5.340470 -0.363859 0.037229  
 C -4.836052 0.465614 1.025319  
 N -6.813577 -0.514792 -0.069413  
 O -7.493226 0.118967 0.706422  
 O -7.234326 -1.259328 -0.924113  
 H 0.052793 4.058095 0.740500  
 H 1.635964 1.061292 -1.906159  
 H 1.444834 2.621200 -3.781834  
 H 0.571499 4.915981 -3.425245  
 H -0.123430 5.627194 -1.153694  
 H -1.100363 1.939370 1.272275  
 H -1.126156 0.447352 3.239291  
 H 0.214393 -0.490786 2.579677  
 H 0.251027 2.423401 3.538074  
 H 1.363627 1.151415 4.030812  
 H 2.015104 2.966385 2.028950  
 H 4.532624 2.126388 1.633022  
 H 4.554893 0.884415 0.359463  
 H 3.581239 2.359007 0.153620  
 H 3.711439 0.355141 3.367207  
 H 2.354143 -0.701634 2.930019  
 H 3.891280 -0.827995 2.062559  
 H -3.049775 1.256220 1.883797  
 H -2.491277 -1.437562 -1.414861  
 H -4.986318 -1.693442 -1.604480  
 H -5.513131 0.977508 1.695129

SCF Energy (M06-2X/6-311+G\*\*)= -2550.94635048

Gibbs Energy (M06-2X/6-311+G\*\*)= -2550.621478

Number of imaginary frequencies = 0

### E

C 2.407710 0.555537 -0.058922  
 C 2.741631 -0.898938 0.025291  
 O 1.240436 0.945713 -0.081340  
 In -0.663302 -0.045839 0.006685  
 Cl -0.321954 -1.148071 2.025325  
 C 3.508244 1.559097 -0.110246  
 Cl -0.417495 -1.387198 -1.875293

Cl -2.151456 1.701884 -0.068005  
H 3.812553 -1.075364 -0.047608  
H 2.365333 -1.285143 0.978979  
H 2.213064 -1.437603 -0.767180  
H 4.123433 1.358848 -0.992463  
H 3.110240 2.570024 -0.142150  
H 4.153561 1.423021 0.762362  
SCF Energy (M06-2X/6-311+G\*\*)= -1575.78919746  
Gibbs Energy (M06-2X/6-311+G\*\*)= -1575.742708  
Number of imaginary frequencies = 0

**TS\_IA\_1d**

C -2.284003 1.943794 1.395966  
C -1.325430 1.322156 0.543844  
C -1.764683 0.597859 -0.529988  
C -3.149945 0.396965 -0.769190  
C -4.099448 0.994770 0.098556  
C -3.623605 1.787085 1.180188  
C 0.152633 1.440096 0.854365  
C 0.561669 1.075814 2.315784  
C 1.740239 1.990165 2.647822  
C 1.338804 3.357842 2.101264  
C 0.523998 3.092123 0.834154  
C 1.166571 3.126719 -0.460428  
C 0.347031 3.239350 -1.672867  
O 0.974163 0.843670 -0.066216  
In 1.646737 -0.734493 -1.066226  
Cl 2.201910 0.452636 -3.051152  
C 2.626564 3.084188 -0.615191  
Cl -0.011002 -2.295652 -1.605702  
Cl 3.547916 -1.479848 0.040916  
C 0.979241 -0.394091 2.522530  
O 2.056136 -0.616845 3.019719  
C 0.084738 -1.523666 2.130338  
C -1.304173 -1.406247 2.052128  
C 0.689982 -2.761632 1.883733  
C -0.084035 -3.854053 1.523127  
C -1.466598 -3.725451 1.425289  
C -2.077084 -2.506550 1.700064  
C -3.600306 -0.412400 -1.841731  
C -4.942584 -0.603753 -2.045511  
C -5.890417 0.002682 -1.188822  
C -5.479428 0.784144 -0.139364  
H -1.950355 2.545798 2.236539  
H -1.065154 0.122133 -1.201560  
H -4.344000 2.260677 1.838861  
H -0.279030 1.285514 2.987928  
H 1.963568 2.005349 3.713807  
H 2.626669 1.595917 2.145288  
H 0.688877 3.872351 2.813739

H 2.196137 4.011620 1.925052  
 H -0.420559 3.631357 0.796703  
 H 0.682790 4.123717 -2.230064  
 H 0.587043 2.380326 -2.315043  
 H -0.719534 3.296707 -1.469432  
 H 2.948871 4.138690 -0.609120  
 H 3.117125 2.580702 0.215639  
 H 2.913533 2.644691 -1.571690  
 H -1.795339 -0.470174 2.286185  
 H 1.768151 -2.838495 1.963152  
 H 0.391587 -4.802034 1.303596  
 H -2.069211 -4.577100 1.131740  
 H -3.154561 -2.407746 1.637460  
 H -2.862607 -0.884249 -2.482196  
 H -5.282989 -1.226953 -2.863711  
 H -6.947668 -0.157344 -1.364226  
 H -6.204247 1.245372 0.523016  
 SCF Energy (M06-2X/6-311+G\*\*)= -2500.02365476  
 Gibbs Energy (M06-2X/6-311+G\*\*)= -2499.658372  
 Number of imaginary frequencies = 1 (-289.8)

**TS\_IA\_1e**

C 2.707791 -1.332635 1.155501  
 C 1.592418 -0.957253 0.393781  
 C 1.789571 -0.322923 -0.827477  
 C 3.074460 -0.030798 -1.277324  
 C 4.149480 -0.393532 -0.487893  
 C 3.992421 -1.050489 0.727181  
 C 0.185422 -1.239423 0.908057  
 C -0.105345 -0.737308 2.360019  
 C -1.052953 -1.772293 2.965292  
 C -0.494603 -3.119055 2.516283  
 C 0.078839 -2.897794 1.112196  
 C -0.739772 -3.229313 -0.044932  
 C -0.106103 -3.431247 -1.347908  
 O -0.803071 -0.881017 0.032703  
 In -1.892738 0.409364 -1.018887  
 Cl -2.439078 -1.134157 -2.746141  
 C -2.195613 -3.372622 0.040155  
 Cl -0.597992 2.115779 -1.944533  
 Cl -3.747588 0.956603 0.262566  
 C -0.754388 0.658721 2.432944  
 O -1.810479 0.770918 3.004947  
 C -0.102399 1.850510 1.815223  
 C 1.272770 1.936137 1.591418  
 C -0.924967 2.939153 1.502245  
 C -0.379307 4.079778 0.933647  
 C 0.990165 4.152393 0.694901  
 C 1.817217 3.086821 1.033939  
 N 5.518899 -0.083873 -0.952573

O 5.634964 0.457637 -2.028496  
O 6.437259 -0.392395 -0.223874  
H 2.573959 -1.844570 2.103687  
H 0.947228 -0.016126 -1.428904  
H 3.238147 0.478810 -2.217638  
H 4.863590 -1.323125 1.307407  
H 0.831896 -0.708322 2.927853  
H -1.126608 -1.680705 4.048414  
H -2.053629 -1.592839 2.566087  
H 0.330066 -3.422551 3.166269  
H -1.235962 -3.920654 2.551058  
H 1.073313 -3.320252 0.984875  
H -0.591640 -4.244585 -1.894617  
H -0.367095 -2.521133 -1.918132  
H 0.973700 -3.549759 -1.302805  
H -2.366321 -4.453438 0.182522  
H -2.627250 -2.843348 0.886322  
H -2.671187 -3.086338 -0.900774  
H 1.930232 1.124061 1.875830  
H -1.988728 2.860694 1.696044  
H -1.022265 4.908342 0.663413  
H 1.413938 5.041491 0.243172  
H 2.885657 3.150673 0.865514  
SCF Energy (M06-2X/6-311+G\*\*)= -2550.89031972  
Gibbs Energy (M06-2X/6-311+G\*\*)= -2550.570043  
Number of imaginary frequencies = 1 (-227.7)

**TS\_IB\_1d**

C 1.567394 3.437617 0.021841  
C 1.329012 2.110316 -0.356195  
C 0.722507 1.864132 -1.582061  
C 0.311171 2.919743 -2.394528  
C 0.519882 4.232008 -1.997065  
C 1.162674 4.489639 -0.785474  
C 1.733770 0.963129 0.557340  
C 1.300425 1.092849 2.051978  
C 2.422816 0.447387 2.863462  
C 3.712193 0.938484 2.210942  
C 3.418957 1.055044 0.714372  
C 3.756260 -0.035184 -0.173501  
C 3.849972 0.205876 -1.618060  
O 1.449117 -0.281155 0.060617  
In 0.183839 -1.660860 -0.616668  
Cl 1.717226 -2.626531 -2.162554  
C 4.037178 -1.390658 0.316943  
Cl -1.625539 -0.803557 -1.819586  
Cl -0.259705 -3.130207 1.131183  
C -0.034376 0.395094 2.378000  
O -0.046772 -0.448843 3.240840  
C -1.283765 0.742238 1.640239

C -1.486620 1.995425 1.004851  
 C -2.280622 -0.209106 1.614463  
 C -3.485370 0.021310 0.914506  
 C -3.675021 1.267226 0.258338  
 C -2.653690 2.248476 0.338782  
 C -4.494329 -0.972295 0.825575  
 C -5.642124 -0.732877 0.119792  
 C -5.835656 0.512382 -0.525792  
 C -4.877478 1.488826 -0.457770  
 H 2.066953 3.655559 0.961896  
 H 0.542979 0.852615 -1.913548  
 H -0.182374 2.702209 -3.334177  
 H 0.194876 5.053204 -2.624671  
 H 1.344642 5.510886 -0.472055  
 H 1.206185 2.153255 2.312188  
 H 2.360799 0.693396 3.923013  
 H 2.316651 -0.636920 2.785379  
 H 3.965796 1.936086 2.578211  
 H 4.567387 0.293766 2.426868  
 H 3.727098 2.002960 0.279137  
 H 4.840532 -0.123594 -1.957141  
 H 3.137020 -0.471841 -2.110545  
 H 3.671936 1.241527 -1.898433  
 H 5.129886 -1.426346 0.459836  
 H 3.564974 -1.592335 1.276022  
 H 3.767211 -2.143340 -0.426072  
 H -0.729101 2.766088 1.061545  
 H -2.119333 -1.156030 2.119004  
 H -2.809114 3.208649 -0.141641  
 H -4.329074 -1.926479 1.314023  
 H -6.405910 -1.497539 0.044803  
 H -6.749491 0.687983 -1.081229  
 H -5.022041 2.440913 -0.956933

SCF Energy (M06-2X/6-311+G\*\*)= -2500.02141664

Gibbs Energy (M06-2X/6-311+G\*\*)= -2499.657295

Number of imaginary frequencies = 1 (-291.6)

**TS\_IB\_1e**

C 0.582017 3.615556 -0.000054  
 C 0.660085 2.268759 -0.376008  
 C 0.033837 1.864123 -1.548798  
 C -0.699364 2.773563 -2.310080  
 C -0.799004 4.099521 -1.913966  
 C -0.144000 4.522963 -0.756782  
 C 1.395916 1.267355 0.500950  
 C 1.004638 1.282259 2.013931  
 C 2.286271 0.932174 2.770174  
 C 3.379342 1.737899 2.074067  
 C 2.998722 1.786819 0.592648  
 C 3.575645 0.830007 -0.329033

C 3.526479 1.089549 -1.771396  
 O 1.418857 -0.006968 0.000559  
 In 0.586382 -1.711202 -0.592825  
 Cl 2.231777 -2.261812 -2.208061  
 C 4.237153 -0.397207 0.129266  
 Cl -1.468788 -1.395640 -1.659071  
 Cl 0.648519 -3.117750 1.256968  
 C -0.103675 0.291955 2.411976  
 O 0.105375 -0.476750 3.316236  
 C -1.433123 0.267609 1.718158  
 C -1.969825 1.374612 1.059745  
 C -2.161009 -0.925110 1.793536  
 C -3.399731 -1.027646 1.181659  
 C -3.891833 0.082219 0.513042  
 C -3.212256 1.286661 0.446907  
 N -5.209683 -0.018208 -0.156543  
 O -5.592866 0.946395 -0.782545  
 O -5.820884 -1.055328 -0.033580  
 H 1.083147 3.961125 0.900233  
 H 0.080523 0.833232 -1.866755  
 H -1.200943 2.429969 -3.206911  
 H -1.376567 4.803682 -2.500616  
 H -0.203721 5.559107 -0.445261  
 H 0.668751 2.288947 2.290200  
 H 2.209404 1.147235 3.835108  
 H 2.453384 -0.143455 2.676432  
 H 3.388914 2.764047 2.449930  
 H 4.378259 1.329417 2.243356  
 H 3.038552 2.785625 0.163457  
 H 4.541144 0.997557 -2.178340  
 H 2.961513 0.261063 -2.224733  
 H 3.088222 2.051183 -2.027686  
 H 5.296992 -0.120786 0.259237  
 H 3.861129 -0.736726 1.092580  
 H 4.180778 -1.186328 -0.621817  
 H -1.439101 2.316870 1.030874  
 H -1.730187 -1.768252 2.319791  
 H -3.971567 -1.945148 1.198207  
 H -3.650747 2.125781 -0.075298

SCF Energy (M06-2X/6-311+G\*\*)= -2550.89237511

Gibbs Energy (M06-2X/6-311+G\*\*)= -2550.572044

Number of imaginary frequencies = 1 (-279.1)

#### TS\_IIC\_1d

C -1.678833 -1.872902 0.371547  
 C -1.558590 -1.019594 1.471257  
 C -2.758916 -0.452475 2.023807  
 C -3.969539 -0.691879 1.457153  
 C -4.087506 -1.513558 0.298613  
 C -2.918995 -2.124811 -0.233691



C -0.280899 -0.705650 2.006582  
 C 1.007607 -1.397061 1.620122  
 C 2.096493 -0.753653 2.517503  
 C 1.295177 -0.176289 3.683191  
 C -0.004794 0.269903 3.015508  
 C 1.444841 -1.399604 0.147096  
 O 0.838913 -0.818835 -0.718785  
 C 2.696194 -2.151078 -0.172306  
 C 3.196511 -3.171689 0.640642  
 C 4.342823 -3.860944 0.267035  
 C 5.002847 -3.521343 -0.910219  
 C 4.510771 -2.501161 -1.719907  
 C 3.355028 -1.821380 -1.360801  
 C -3.015832 -2.938236 -1.393546  
 C -4.228434 -3.138397 -1.994234  
 C -5.390408 -2.536794 -1.457606  
 C -5.325099 -1.744818 -0.337196  
 H -0.807120 -2.337794 -0.066510  
 H -2.699180 0.174499 2.902562  
 H -4.867434 -0.252696 1.876506  
 H 0.864114 -2.447098 1.916120  
 H 2.855524 -1.470269 2.826450  
 H 2.581159 0.048366 1.957510  
 H 1.069134 -0.956553 4.417920  
 H 1.812489 0.624339 4.207393  
 H -0.818230 0.543589 3.680107  
 H 2.694580 -3.450228 1.560013  
 H 4.721233 -4.659567 0.893215  
 H 5.902455 -4.053839 -1.196064  
 H 5.028315 -2.234491 -2.633271  
 H 2.954719 -1.022874 -1.976220  
 H -2.111535 -3.374378 -1.802844  
 H -4.302652 -3.746617 -2.886923  
 H -6.344659 -2.698513 -1.945274  
 H -6.219109 -1.280105 0.062356  
 C 0.230972 1.769502 2.047816  
 C -1.169560 2.356144 1.912615  
 O 0.841579 1.464522 0.890897  
 In 0.319443 1.885917 -0.998492  
 Cl 0.043068 4.241362 -0.883270  
 C 1.111450 2.658956 2.915246  
 Cl -1.808064 0.950790 -1.477744  
 Cl 2.100702 1.476125 -2.463840  
 H -1.640181 2.510902 2.886157  
 H -1.070187 3.330661 1.425403  
 H -1.815996 1.744654 1.281619  
 H 0.726052 2.782874 3.929956  
 H 2.135534 2.287881 2.939686  
 H 1.127462 3.633978 2.418494  
 SCF Energy (M06-2X/6-311+G\*\*)= -2500.02263200

Gibbs Energy (M06-2X/6-311+G\*\*)= -2499.654277  
Number of imaginary frequencies = 1 (-302.3)

**TS\_IIc\_1e**

|    |           |           |           |
|----|-----------|-----------|-----------|
| C  | -1.467758 | -2.229773 | -0.139774 |
| C  | -1.486868 | -1.457517 | 1.042430  |
| C  | -2.729688 | -0.993382 | 1.530679  |
| C  | -3.896918 | -1.224302 | 0.831731  |
| C  | -3.813750 | -1.950253 | -0.347445 |
| C  | -2.632071 | -2.476438 | -0.841914 |
| C  | -0.275201 | -1.125776 | 1.725962  |
| C  | 1.077458  | -1.656931 | 1.352342  |
| C  | 2.045111  | -1.090659 | 2.420876  |
| C  | 1.118661  | -0.765000 | 3.591170  |
| C  | -0.160076 | -0.282258 | 2.897871  |
| C  | 1.582728  | -1.409642 | -0.090116 |
| O  | 0.926032  | -0.834136 | -0.917012 |
| C  | 2.948215  | -1.922886 | -0.405798 |
| C  | 3.549453  | -2.975143 | 0.290014  |
| C  | 4.801551  | -3.436254 | -0.096057 |
| C  | 5.463399  | -2.834755 | -1.163060 |
| C  | 4.868121  | -1.783781 | -1.854983 |
| C  | 3.608037  | -1.333425 | -1.488073 |
| N  | -5.070833 | -2.206642 | -1.104166 |
| O  | -4.989186 | -2.908317 | -2.084067 |
| O  | -6.081246 | -1.700042 | -0.676540 |
| H  | -0.541188 | -2.625304 | -0.525746 |
| H  | -2.779590 | -0.443679 | 2.459290  |
| H  | -4.854388 | -0.856970 | 1.173850  |
| H  | -2.635569 | -3.044772 | -1.761337 |
| H  | 0.993724  | -2.750548 | 1.468992  |
| H  | 2.835218  | -1.791862 | 2.680927  |
| H  | 2.502305  | -0.181633 | 2.025860  |
| H  | 0.894631  | -1.670104 | 4.165053  |
| H  | 1.530672  | -0.033010 | 4.282184  |
| H  | -1.037956 | -0.231141 | 3.536554  |
| H  | 3.045249  | -3.456149 | 1.120636  |
| H  | 5.261317  | -4.261496 | 0.433942  |
| H  | 6.444876  | -3.188591 | -1.455953 |
| H  | 5.384542  | -1.314820 | -2.683535 |
| H  | 3.123615  | -0.518992 | -2.014919 |
| C  | 0.007983  | 1.284984  | 2.221742  |
| C  | -1.401535 | 1.868757  | 2.135659  |
| O  | 0.635669  | 1.154348  | 1.014729  |
| In | 0.194175  | 1.969880  | -0.753492 |
| Cl | -0.226005 | 4.243247  | -0.249186 |
| C  | 0.853134  | 2.115516  | 3.180335  |
| Cl | -1.839931 | 0.963546  | -1.458905 |
| Cl | 2.040586  | 1.881411  | -2.185607 |
| H  | -1.915216 | 1.836241  | 3.099868  |

H -1.309532 2.916380 1.837463  
H -2.007863 1.379435 1.371725  
H 0.447571 2.136489 4.195182  
H 1.886103 1.769038 3.195720  
H 0.853630 3.133063 2.778953  
SCF Energy (M06-2X/6-311+G\*\*)= -2550.88191736  
Gibbs Energy (M06-2X/6-311+G\*\*)= -2550.558046  
Number of imaginary frequencies = 1 (-249.3)

**TS\_IID\_1d**

C -1.328053 -2.509724 -1.757320  
C -1.979499 -2.391482 -0.507930  
C -3.386244 -2.543868 -0.467165  
C -4.108451 -2.737072 -1.626030  
C -3.443403 -2.807387 -2.850402  
C -2.055122 -2.714138 -2.912771  
C -1.247166 -2.117147 0.682361  
C 0.258184 -2.067027 0.754544  
C 0.585070 -1.819921 2.249179  
C -0.681906 -2.287369 2.964352  
C -1.792733 -1.888430 1.990024  
C 0.996625 -1.069405 -0.156906  
O 0.417886 -0.314604 -0.898037  
C 2.483330 -1.058895 -0.052202  
C 3.242282 -2.166767 0.414655  
C 4.607063 -2.097092 0.457804  
C 5.289270 -0.913969 0.066669  
C 4.530019 0.197853 -0.388732  
C 3.122145 0.092546 -0.453541  
C 5.198677 1.390751 -0.769501  
C 6.563781 1.468135 -0.705103  
C 7.320998 0.358252 -0.258558  
C 6.701322 -0.804275 0.118864  
H -0.254297 -2.417680 -1.825207  
H -3.907331 -2.503816 0.479238  
H -5.186149 -2.829291 -1.585750  
H -4.012629 -2.944225 -3.762634  
H -1.547588 -2.776000 -3.866542  
H 0.593379 -3.075261 0.465051  
H 1.482028 -2.346145 2.570864  
H 0.735124 -0.749315 2.400866  
H -0.679899 -3.376721 3.076732  
H -0.803171 -1.857589 3.956034  
H -2.773955 -2.306825 2.193769  
H 2.750879 -3.084020 0.718431  
H 5.188788 -2.948473 0.794052  
H 2.529086 0.930750 -0.806125  
H 4.604207 2.233759 -1.104706  
H 7.072270 2.379969 -0.993719  
H 8.401138 0.434219 -0.214291

H 7.282237 -1.653213 0.462803  
 C -2.081098 -0.138786 2.003524  
 C -3.502148 0.031312 1.476222  
 O -1.125350 0.473028 1.274552  
 In -1.286478 1.791719 -0.222712  
 Cl -2.707307 3.439735 0.727690  
 C -2.000787 0.281491 3.465712  
 Cl -2.469213 0.780460 -2.012100  
 Cl 0.764106 2.845369 -0.654662  
 H -4.222235 -0.558215 2.048590  
 H -3.766566 1.086984 1.584675  
 H -3.583693 -0.207222 0.414564  
 H -2.653467 -0.305565 4.116401  
 H -0.973121 0.244342 3.825696  
 H -2.319806 1.327812 3.489733  
 SCF Energy (M06-2X/6-311+G\*\*)= -2500.02016983  
 Gibbs Energy (M06-2X/6-311+G\*\*)= -2499.652137  
 Number of imaginary frequencies = 1 (-283.3)

**TS IID\_1e**

C 0.929556 2.664854 -1.601521  
 C 1.562889 2.565893 -0.340383  
 C 2.929803 2.925105 -0.246741  
 C 3.641765 3.287022 -1.370762  
 C 3.003086 3.326263 -2.610415  
 C 1.644490 3.038156 -2.721101  
 C 0.858418 2.101218 0.805273  
 C -0.623933 1.813964 0.828785  
 C -0.937437 1.409492 2.291834  
 C 0.226062 2.015047 3.075825  
 C 1.405394 1.866792 2.111796  
 C -1.182234 0.791639 -0.173097  
 O -0.496708 0.194483 -0.958722  
 C -2.664170 0.550988 -0.126759  
 C -3.565876 1.486530 0.387250  
 C -4.929754 1.234942 0.352907  
 C -5.358173 0.031721 -0.184760  
 C -4.488813 -0.919283 -0.696342  
 C -3.128480 -0.647275 -0.675291  
 N -6.815252 -0.244705 -0.213813  
 O -7.553416 0.621514 0.201511  
 O -7.169973 -1.315159 -0.650034  
 H -0.118158 2.427209 -1.708284  
 H 3.428649 2.910252 0.712204  
 H 4.692148 3.535744 -1.291700  
 H 3.568423 3.594254 -3.495599  
 H 1.155445 3.082183 -3.685401  
 H -1.102723 2.779977 0.604011  
 H -1.910886 1.765496 2.624693  
 H -0.919912 0.320546 2.364626

H 0.048967 3.079587 3.261699  
H 0.391677 1.539508 4.039934  
H 2.302088 2.419869 2.375238  
H -3.222219 2.425254 0.804536  
H -5.653384 1.944098 0.730573  
H -4.877221 -1.844468 -1.100377  
H -2.411340 -1.359346 -1.068243  
C 1.971448 0.191275 2.016376  
C 3.407570 0.285354 1.513399  
O 1.136998 -0.513284 1.222487  
In 1.555034 -1.722164 -0.316673  
Cl 3.183507 -3.182443 0.584724  
C 1.939106 -0.336203 3.445273  
Cl 2.568467 -0.419472 -2.016340  
Cl -0.350465 -2.977024 -0.843552  
H 4.019693 0.935243 2.143167  
H 3.833984 -0.721255 1.554127  
H 3.462162 0.611216 0.473683  
H 2.475133 0.303910 4.150068  
H 0.914759 -0.495042 3.780729  
H 2.427646 -1.314705 3.410606  
SCF Energy (M06-2X/6-311+G\*\*)= -2550.88813346  
Gibbs Energy (M06-2X/6-311+G\*\*)= -2550.563973  
Number of imaginary frequencies = 1 (-266.9)

## 6. $^1\text{H}$ NMR and $^{13}\text{C}$ NMR

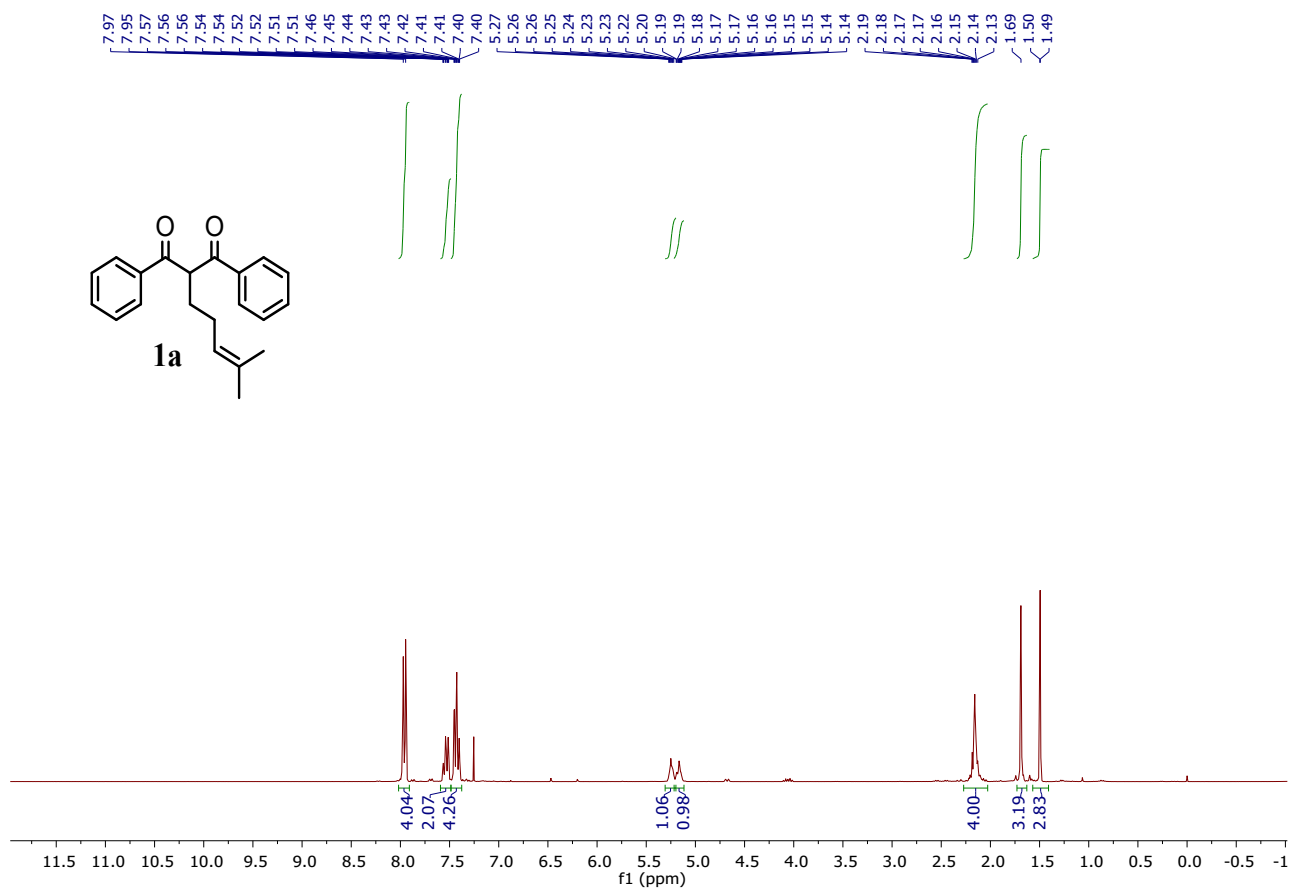

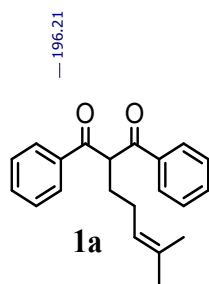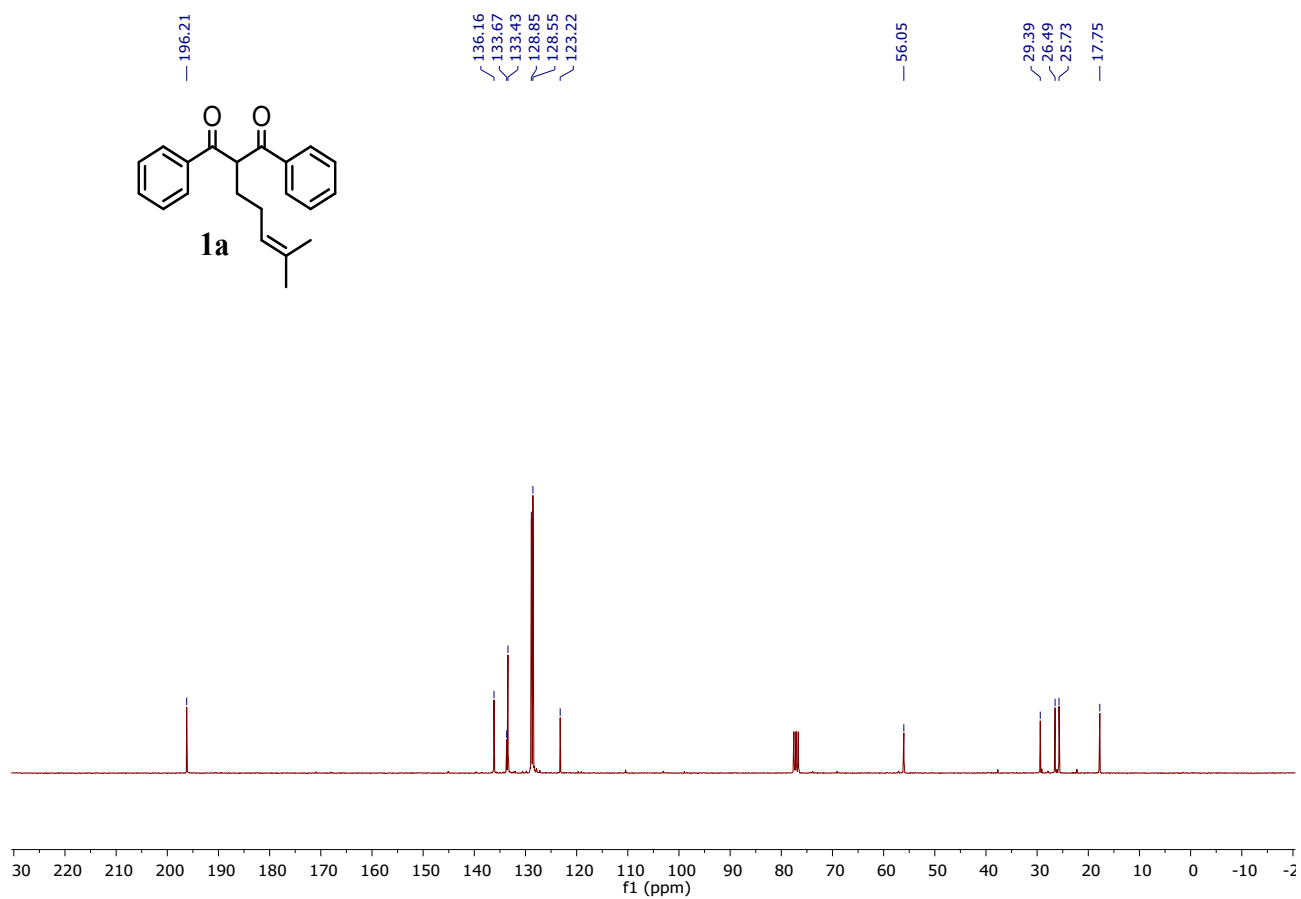

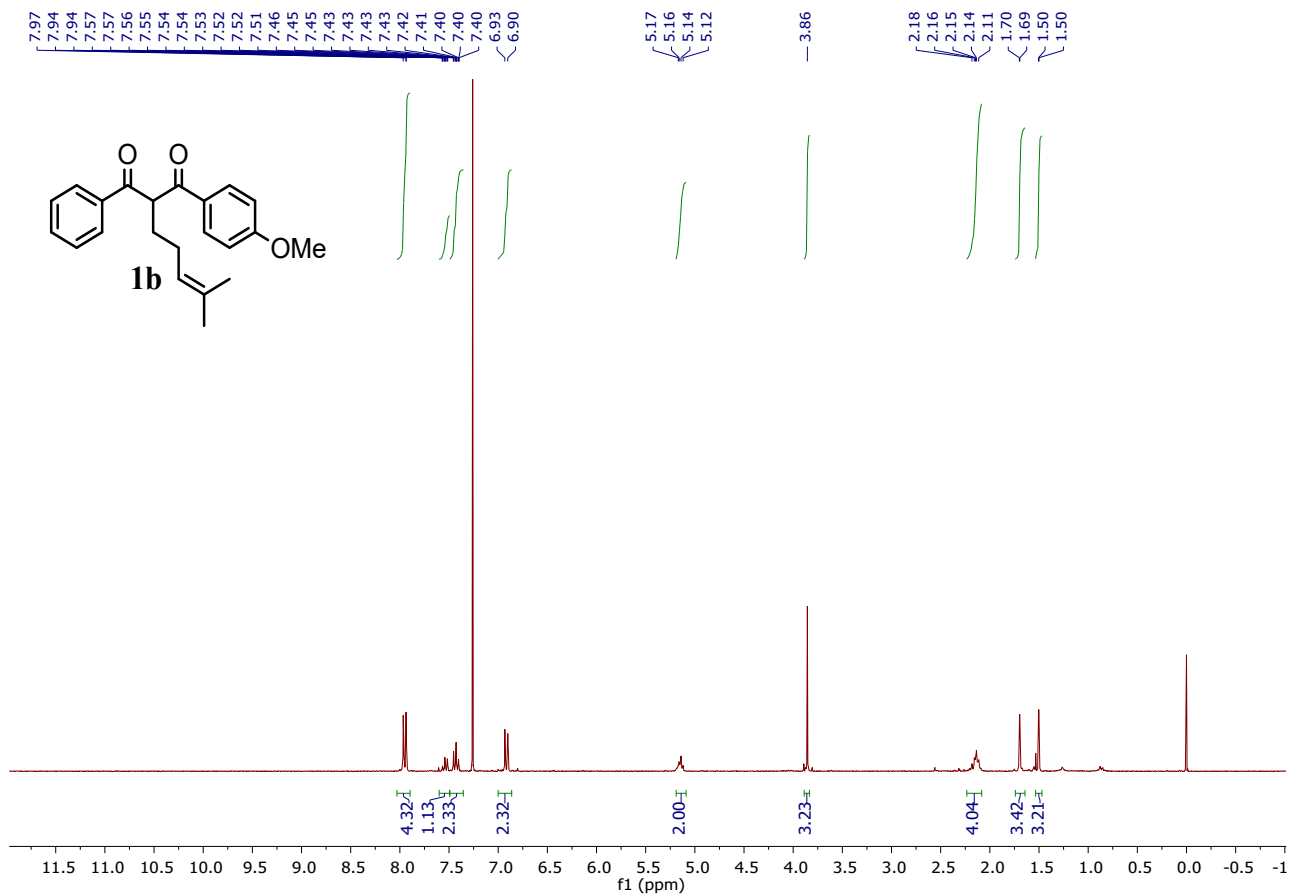



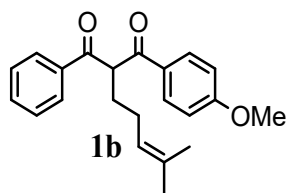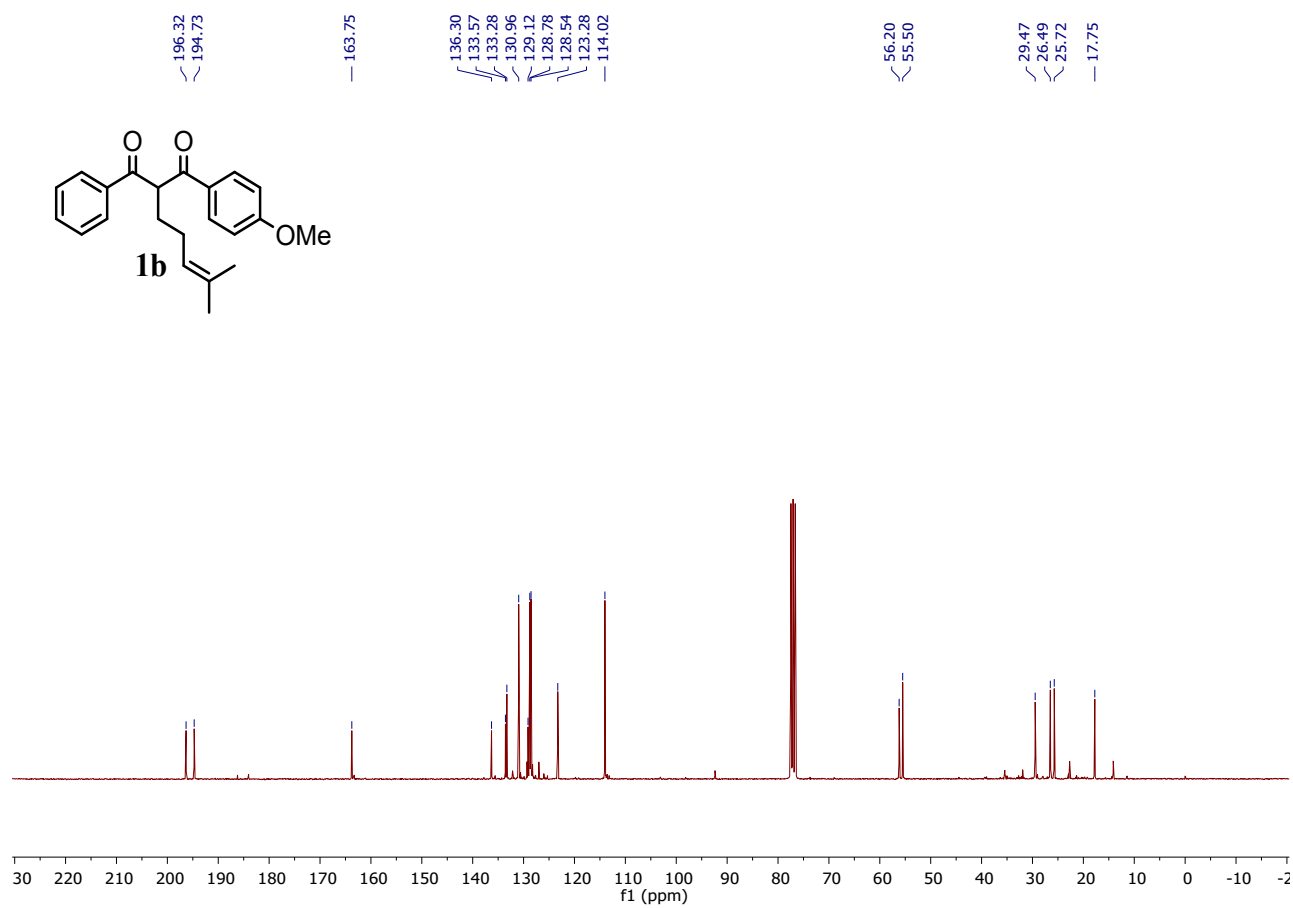

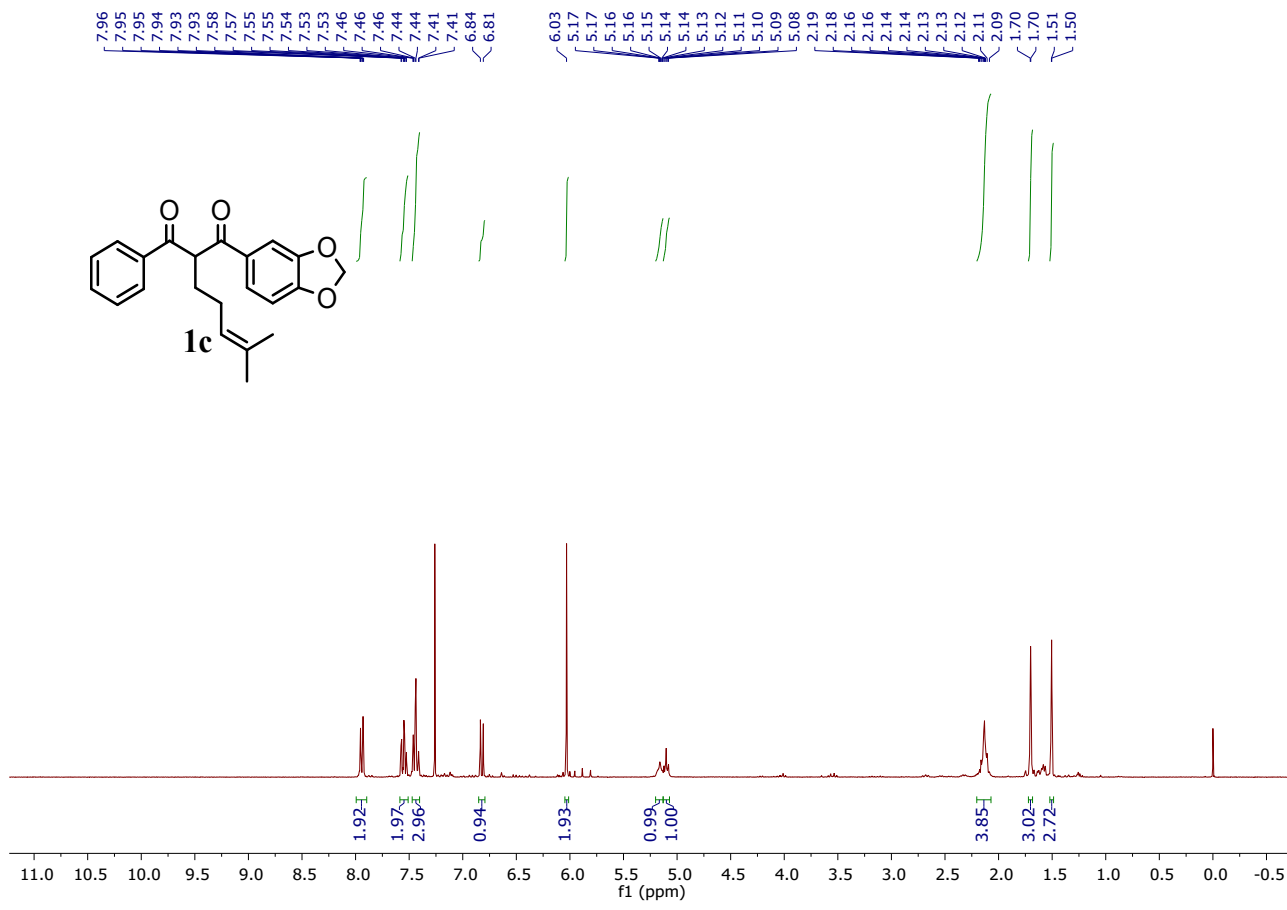

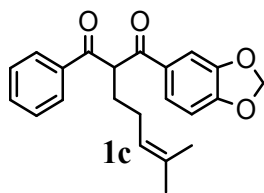

196.19  
194.28

152.10  
148.43  
136.17  
133.68  
133.36  
130.99  
128.81  
128.54  
124.92  
123.21

108.41  
108.06  
101.97

56.16

29.49  
26.46  
25.72  
17.76

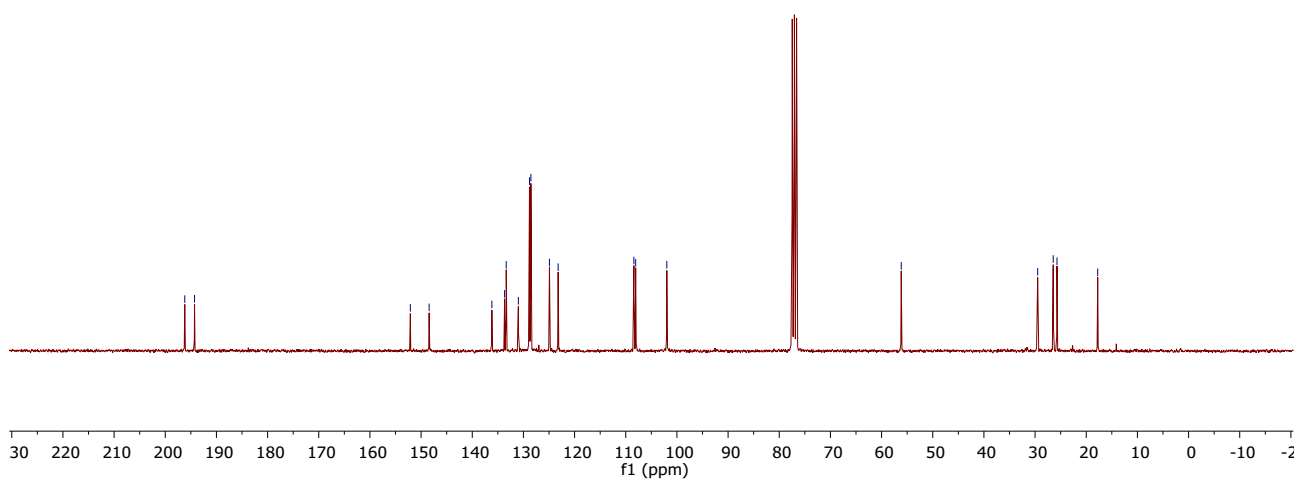

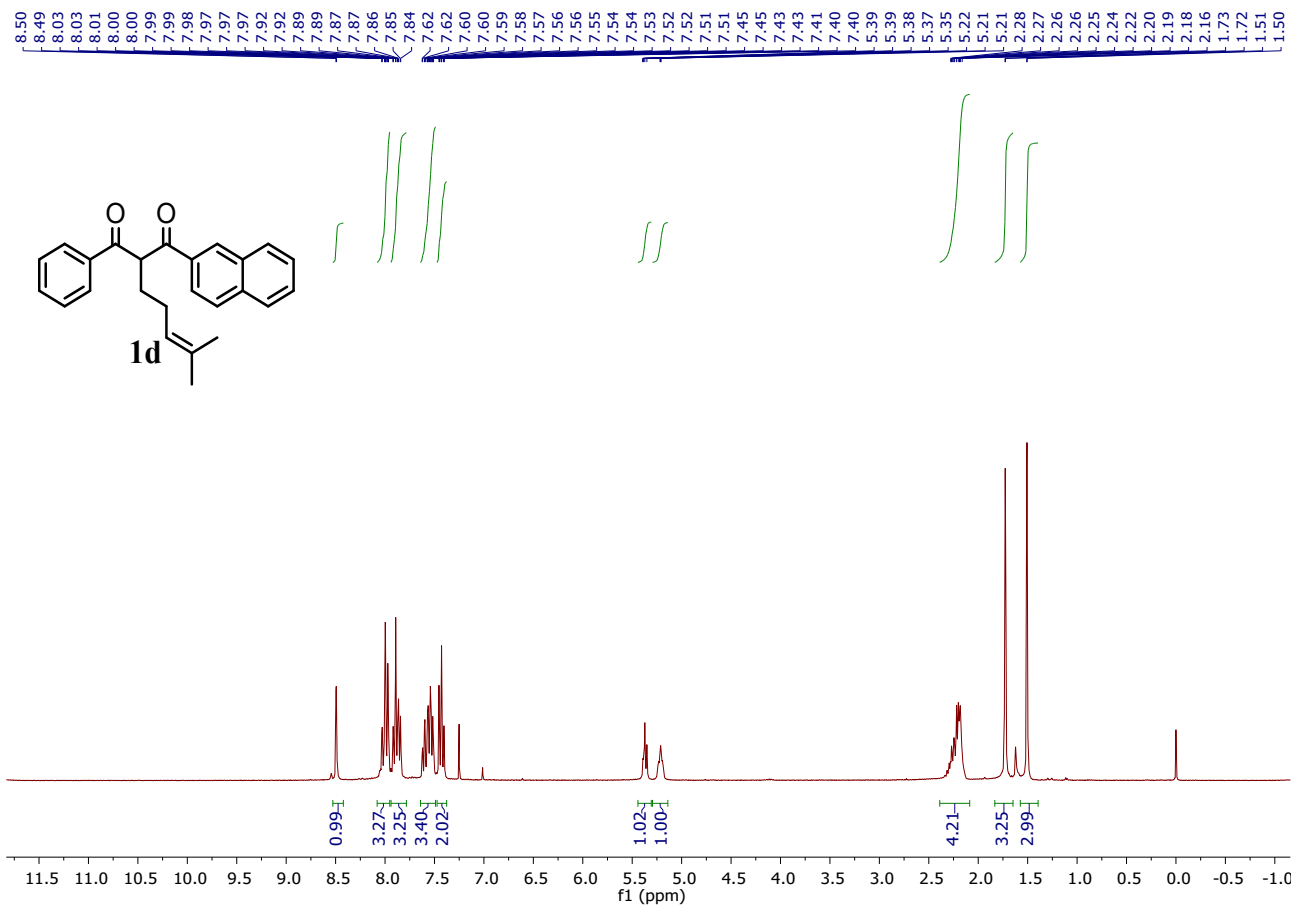

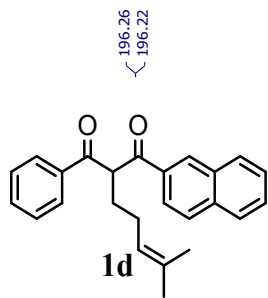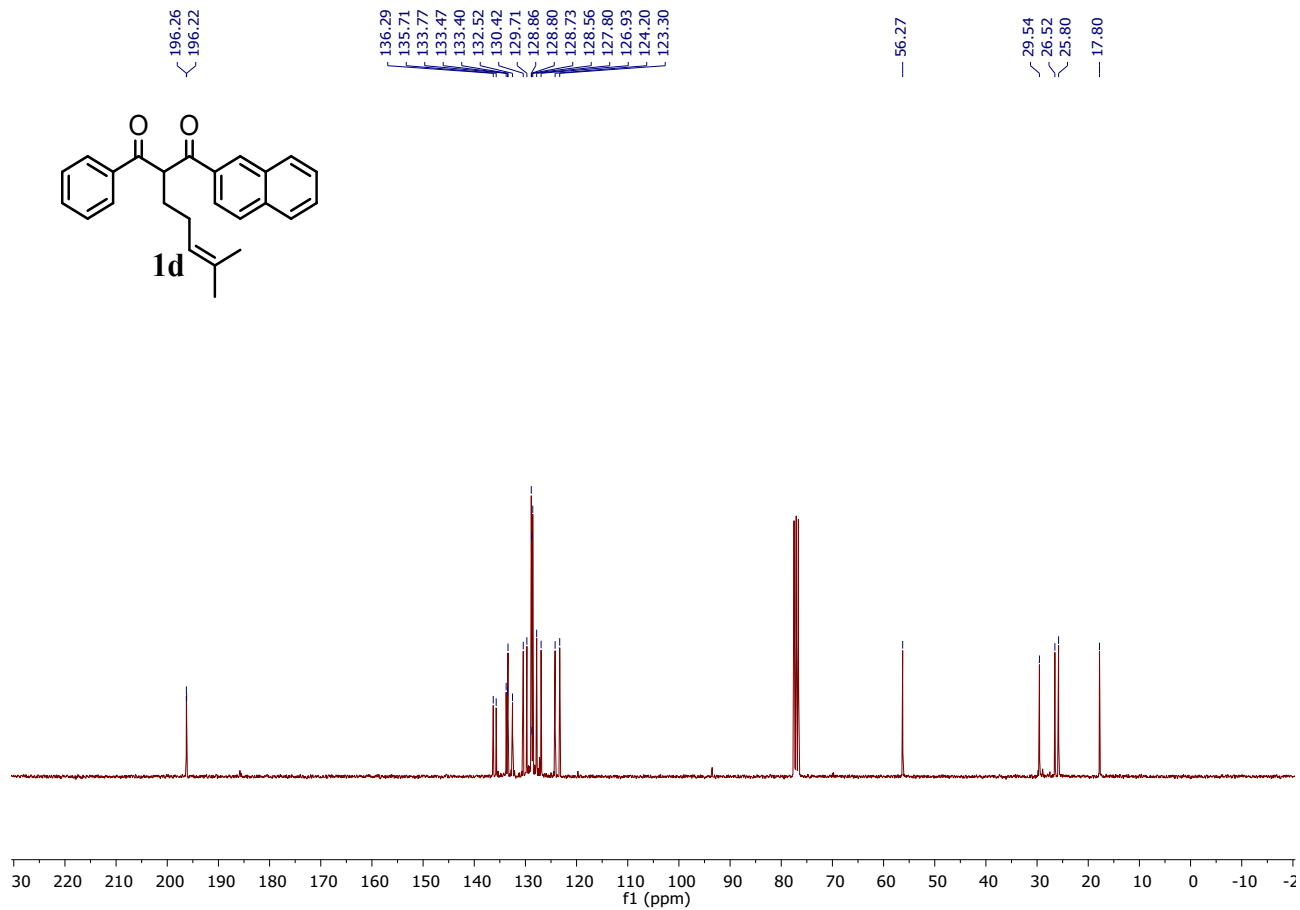

8.29  
8.28  
8.28  
8.28  
8.28  
8.26  
8.26  
8.25  
8.25  
8.08  
8.08  
8.07  
8.05  
7.98  
7.97  
7.97  
7.95  
7.95  
7.94  
7.64  
7.62  
7.61  
7.61  
7.60  
7.59  
7.59  
7.59  
7.59  
7.58  
7.55  
7.52  
7.52  
7.52  
7.52  
7.51  
7.50  
7.50  
7.49  
7.49  
7.49  
7.47  
7.47  
7.46  
7.46  
6.90  
5.21  
5.20  
5.18  
5.17  
5.16  
5.16  
5.15  
5.15  
2.24  
2.22  
2.18  
2.16  
2.15  
2.14  
2.14  
2.13  
2.11  
1.70  
1.70  
1.50  
1.50

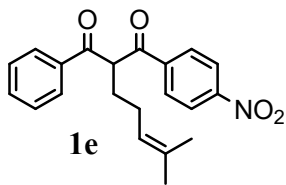

+ Traces of **9e** (\*)

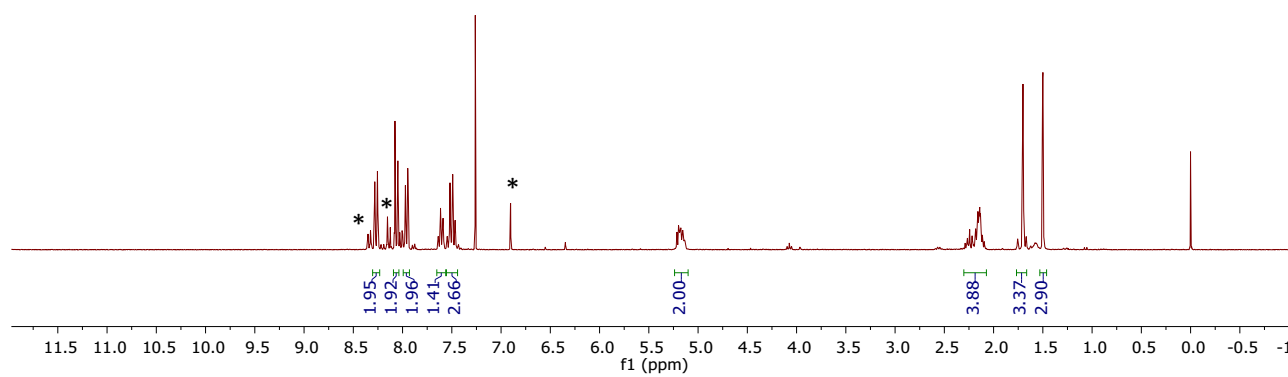

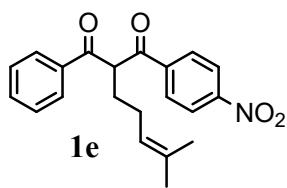

+ Traces of **9e** (\*)

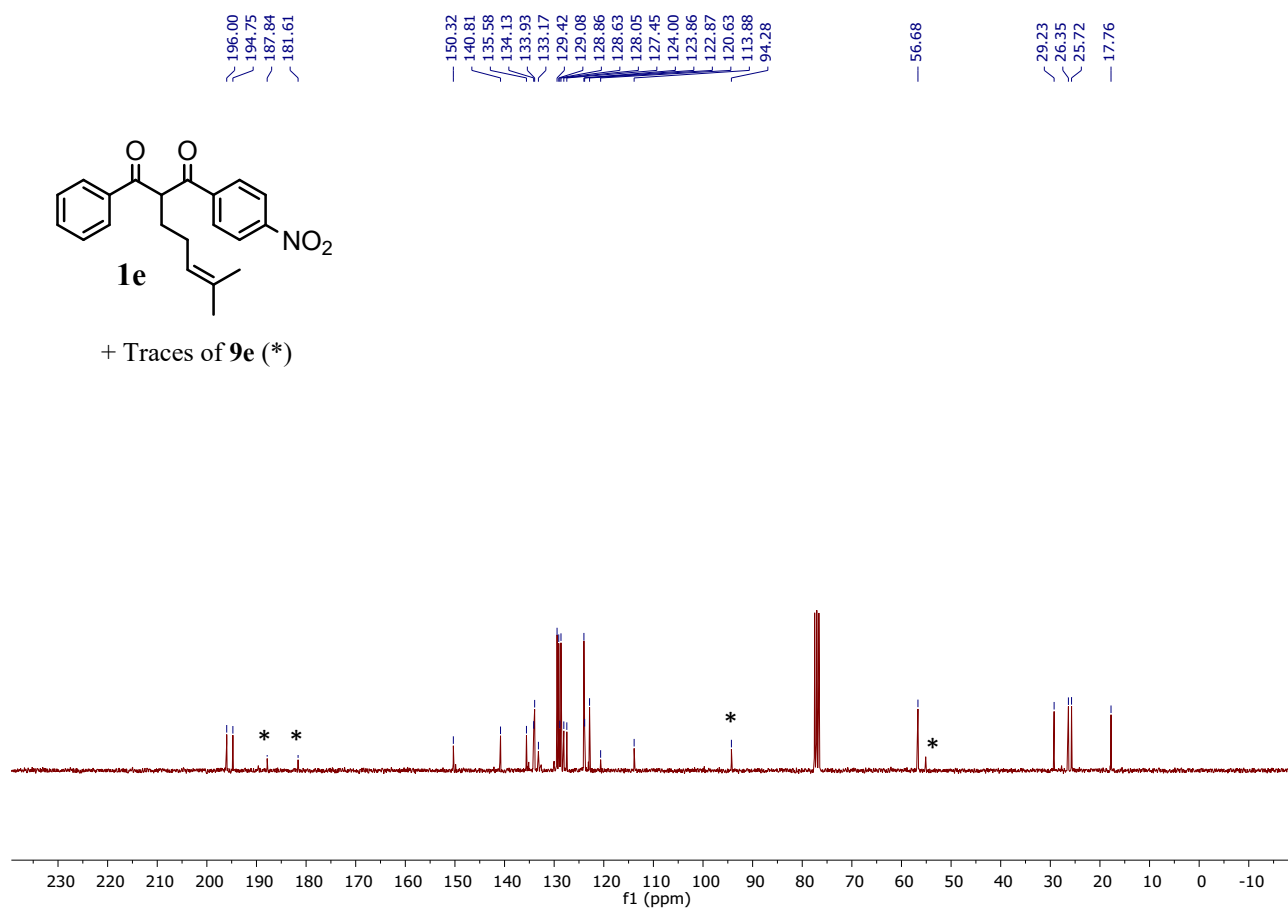

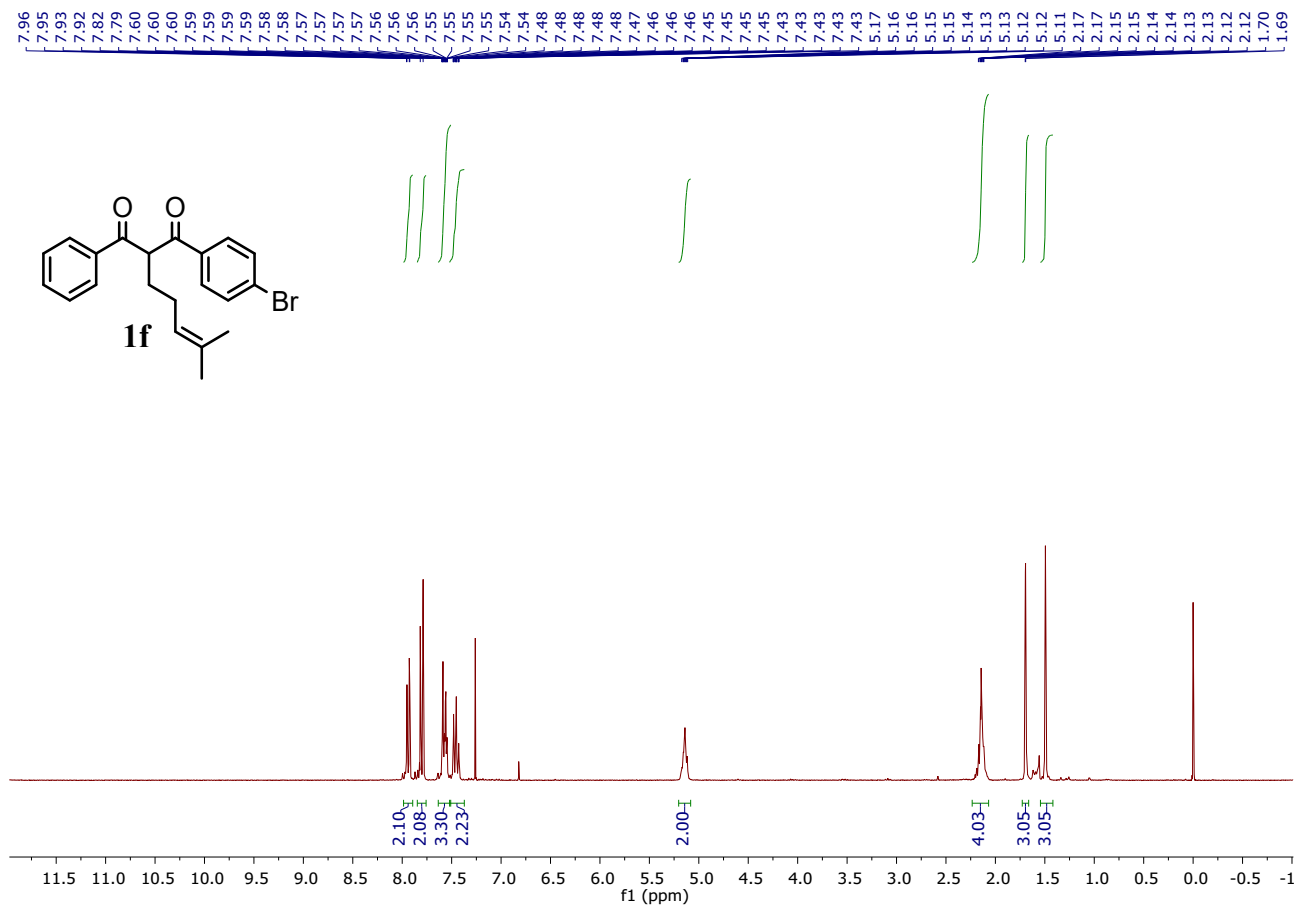



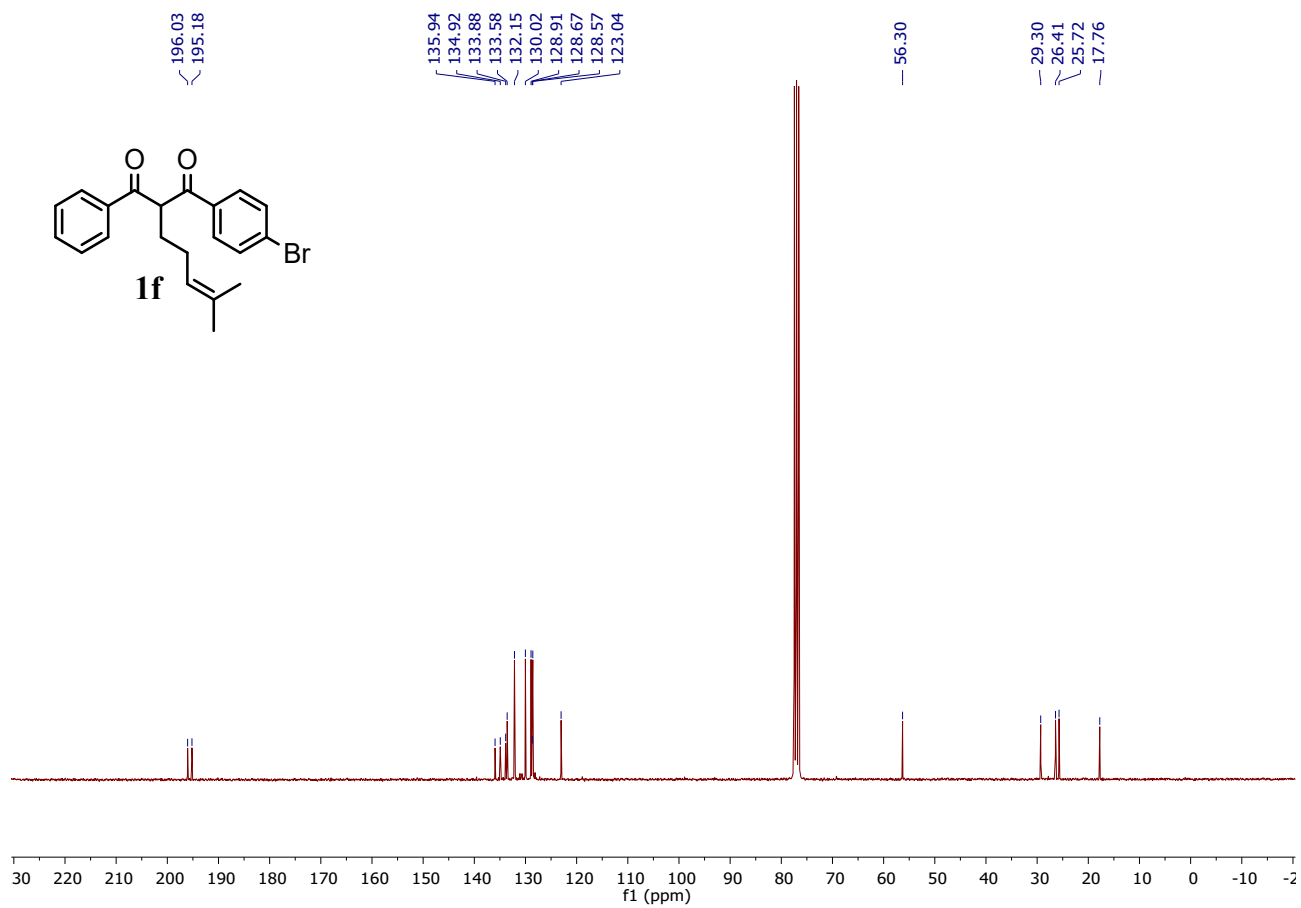

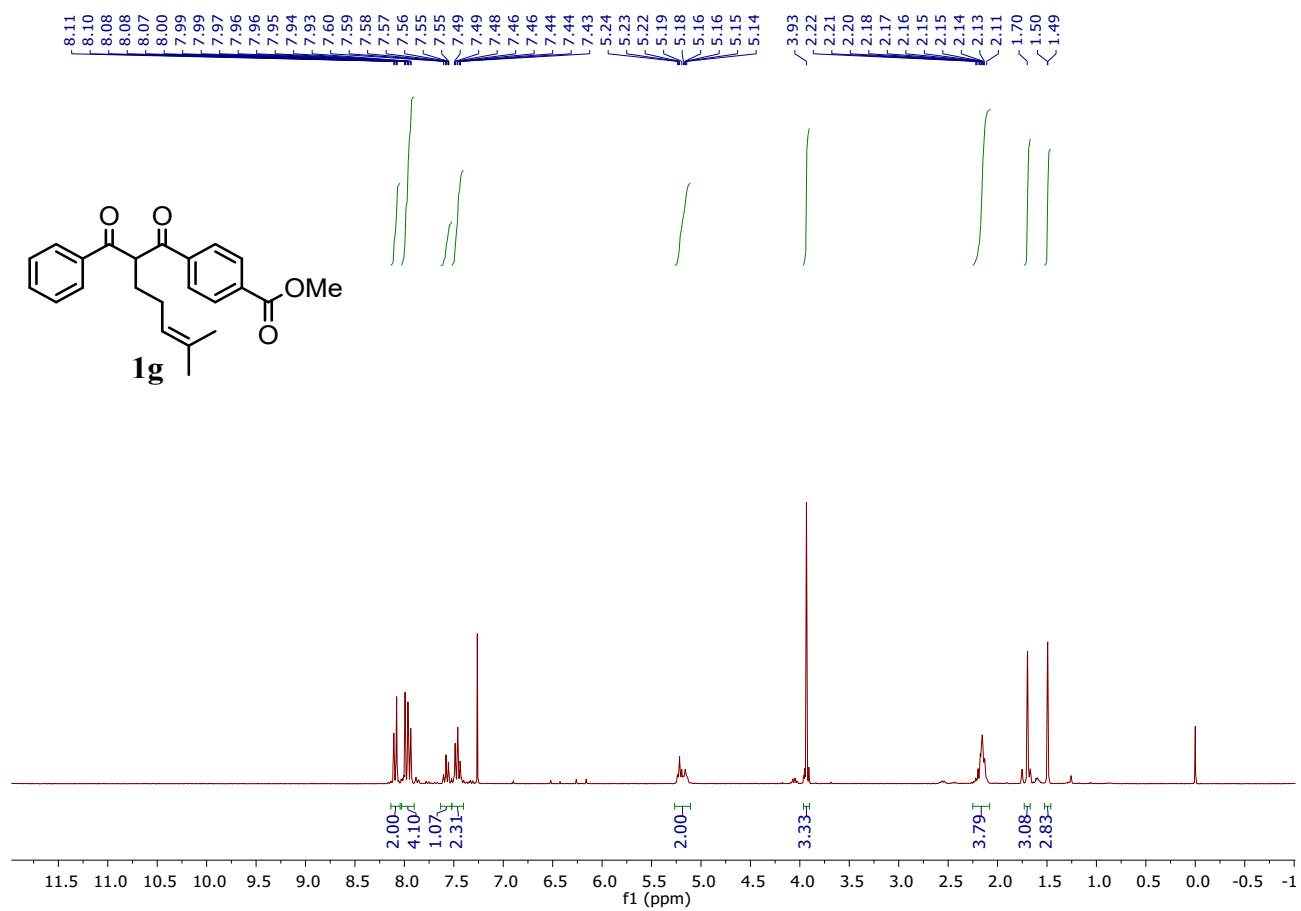

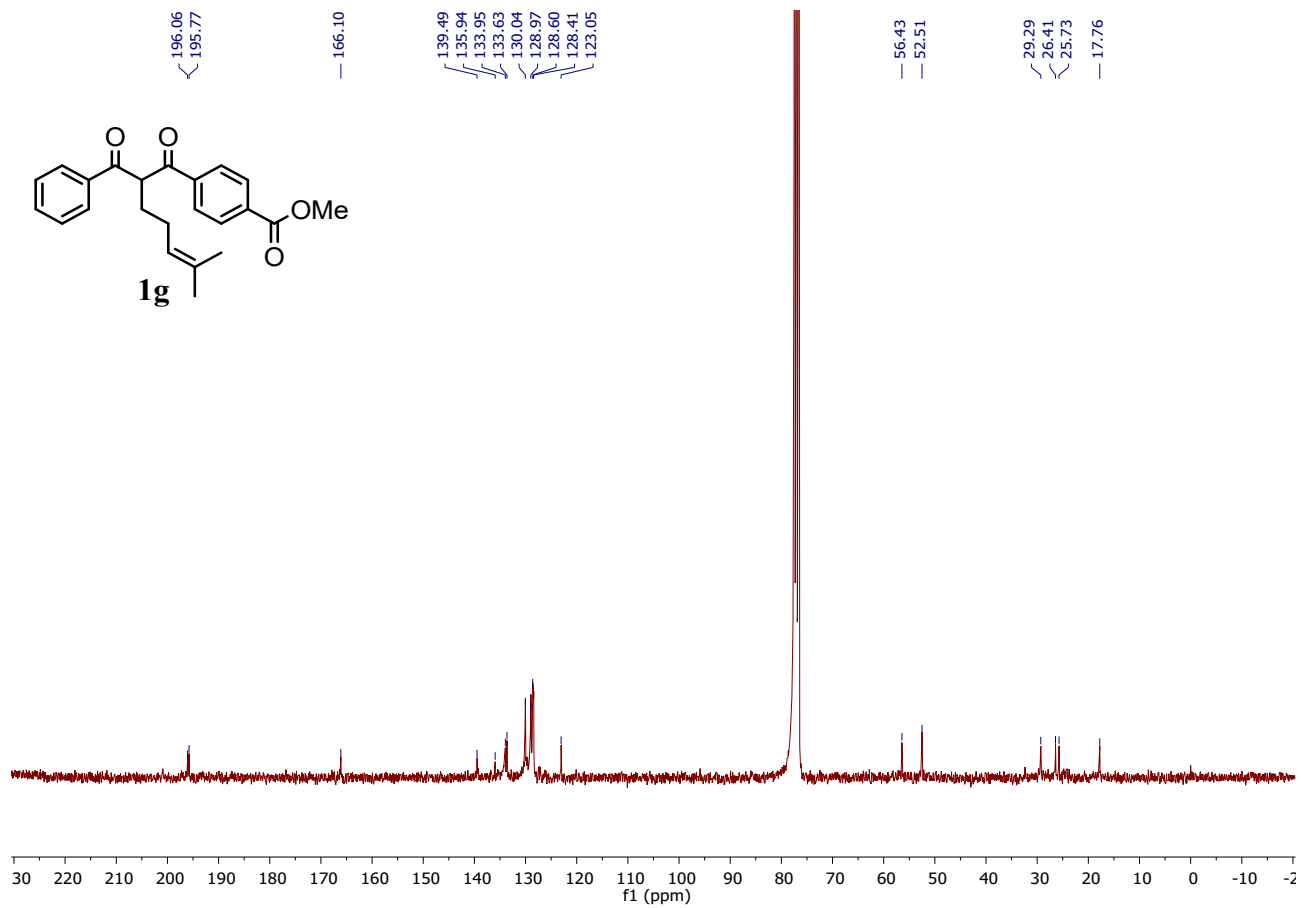

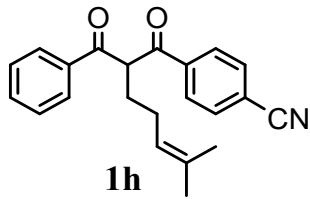

+ Traces of **9h** (\*)

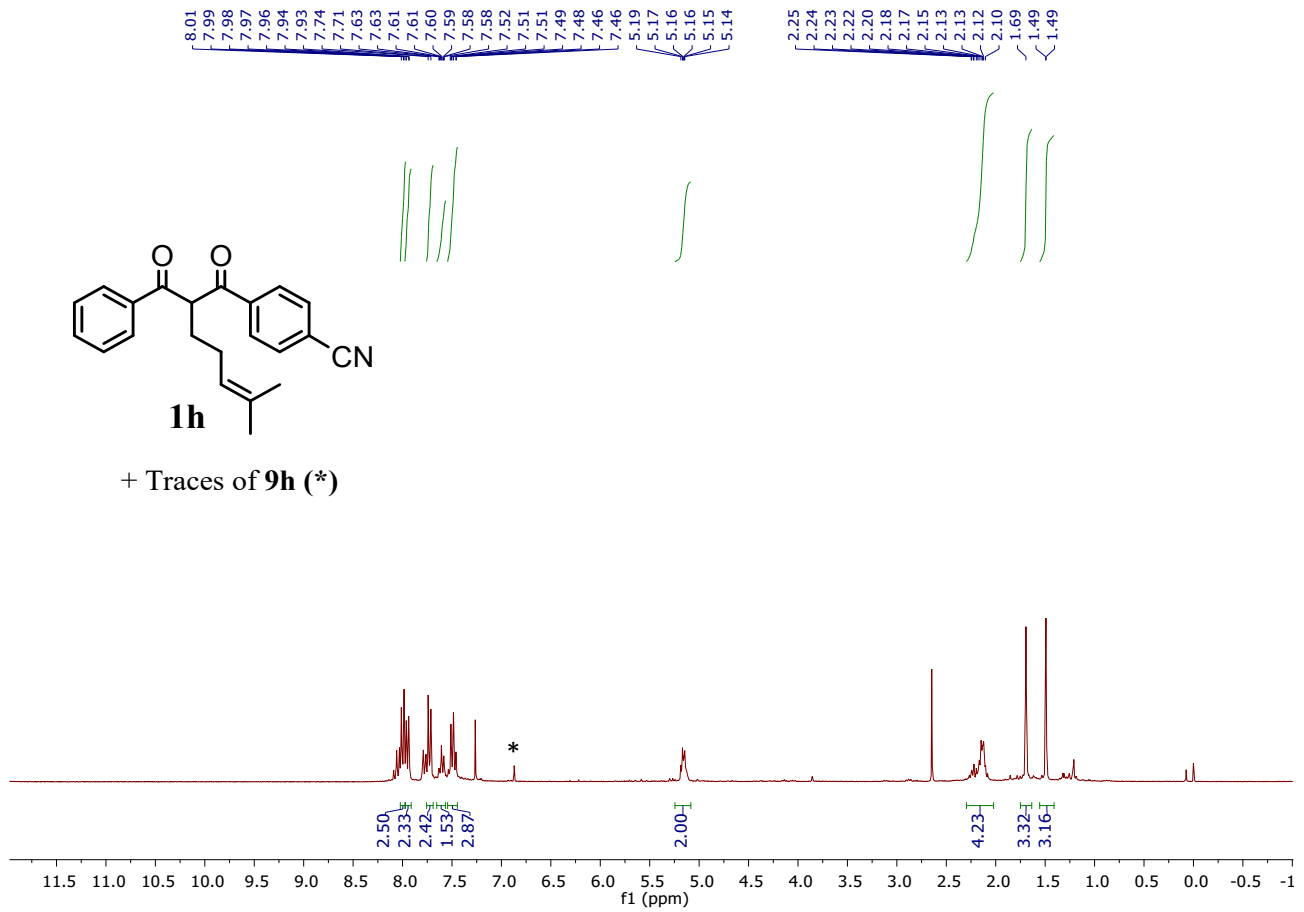

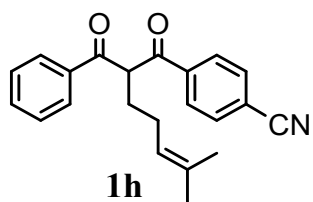

+ Traces of **9h** (\*)

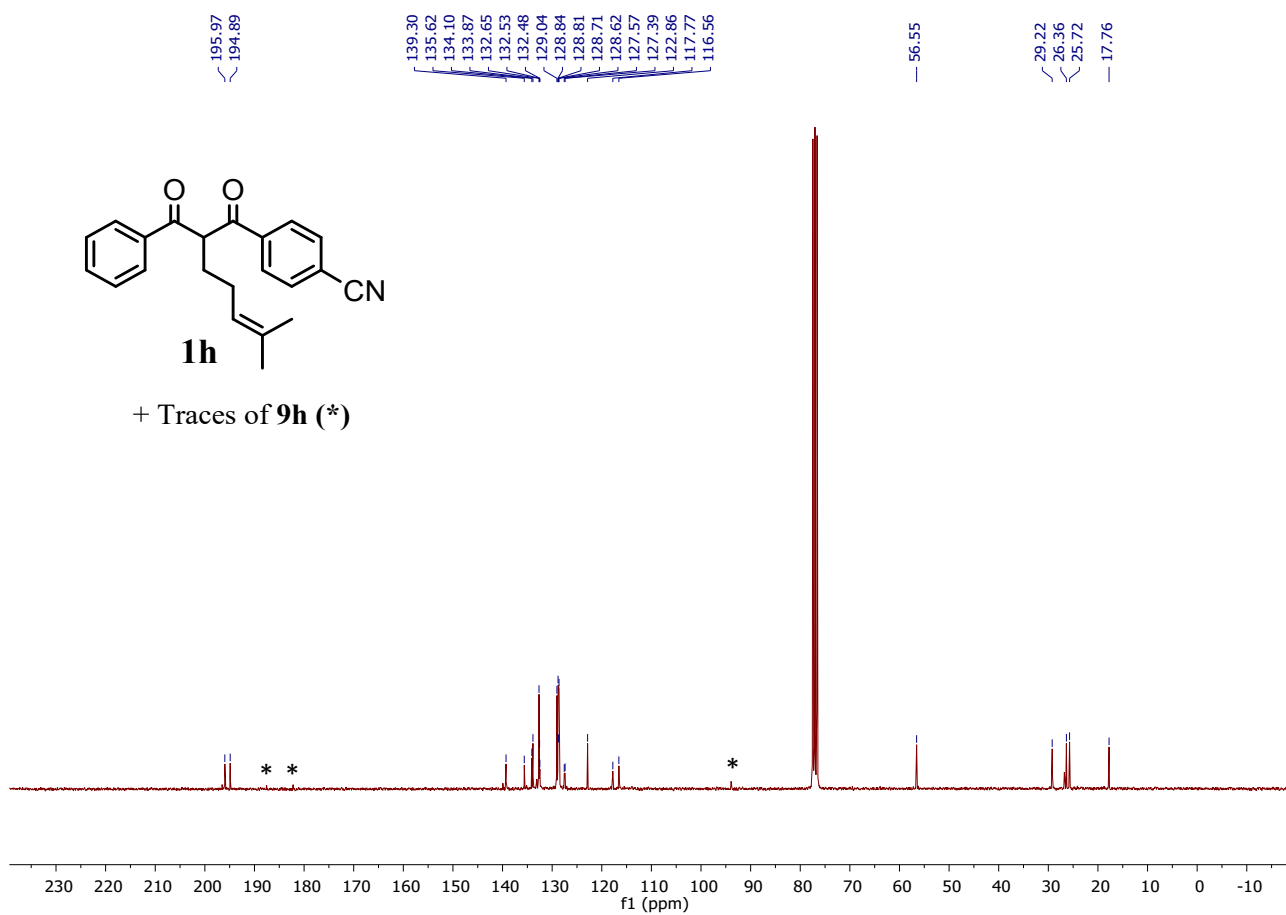

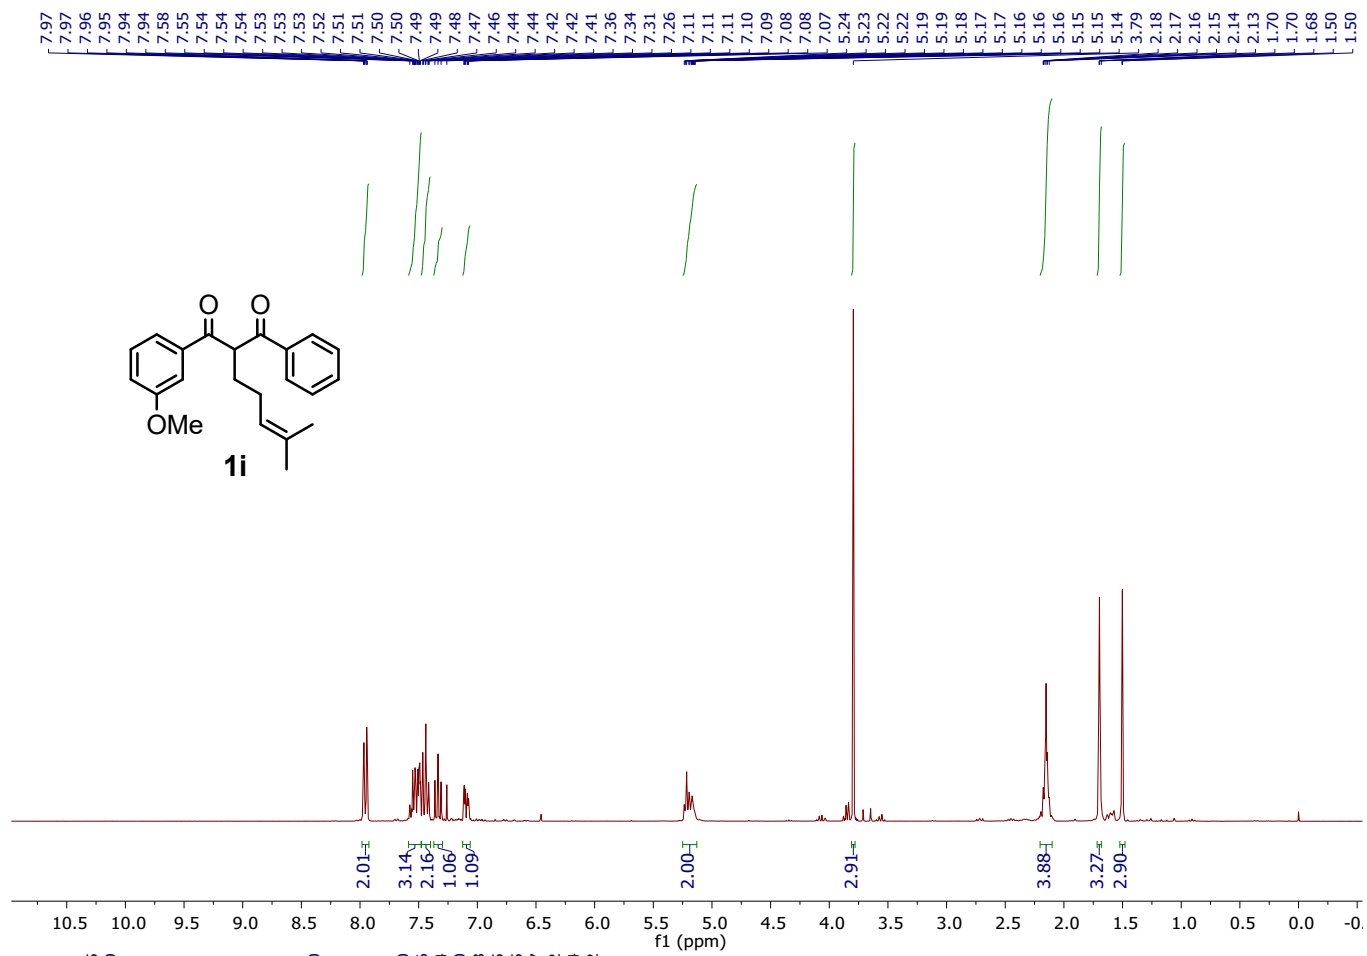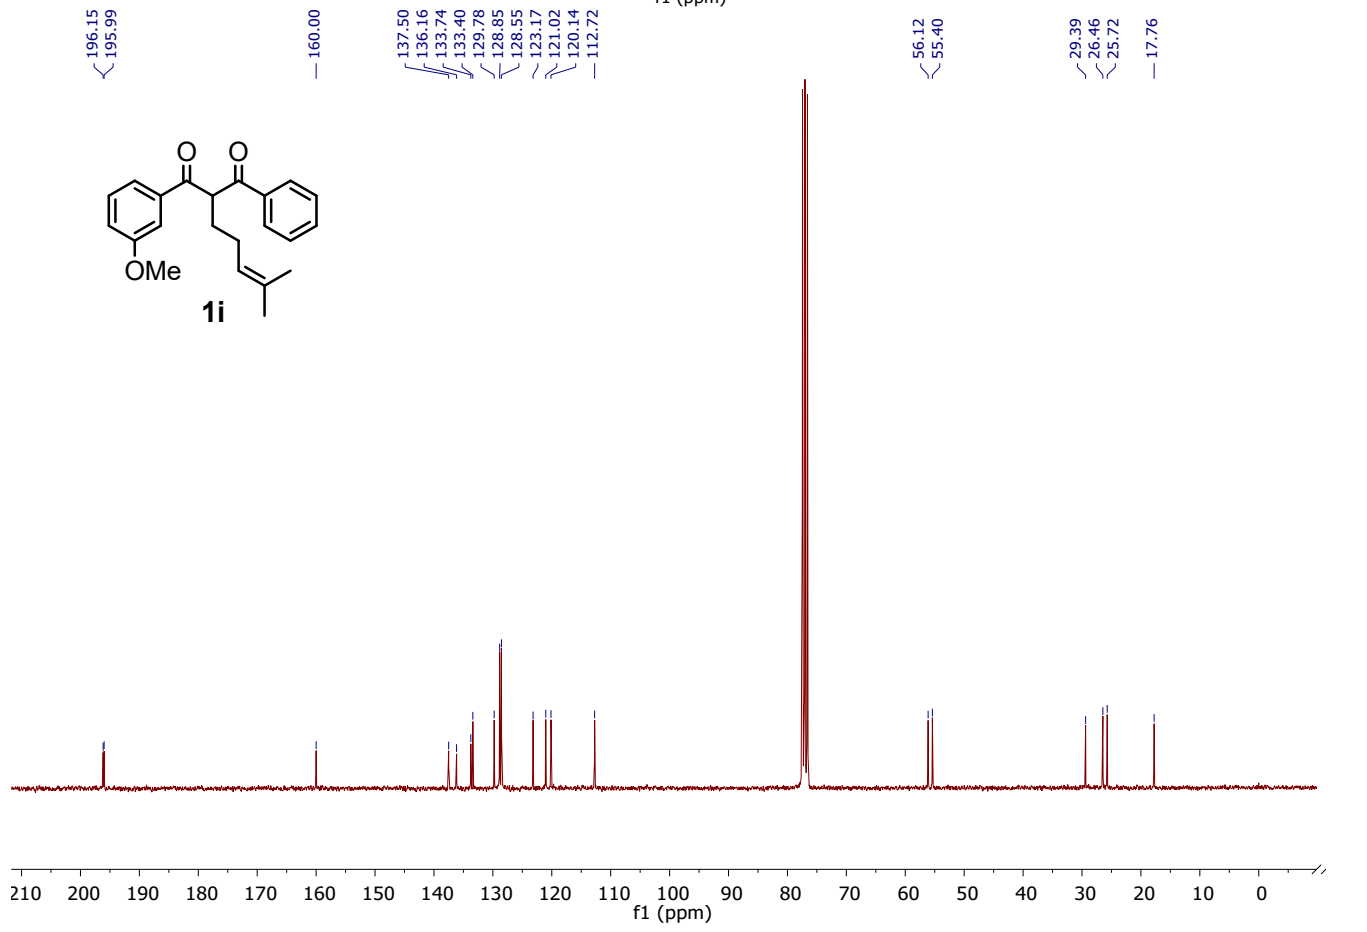

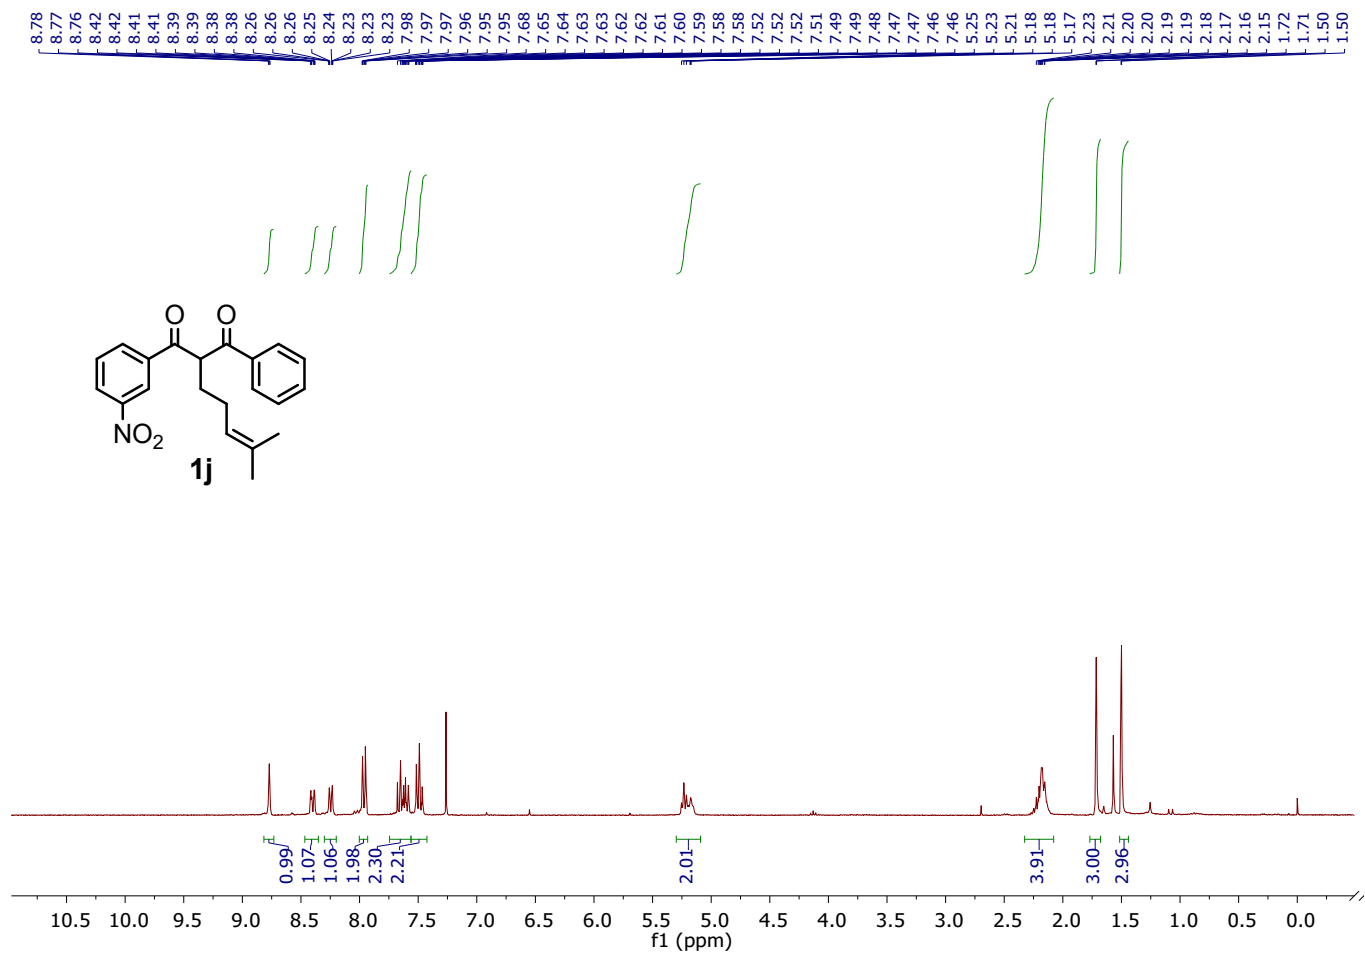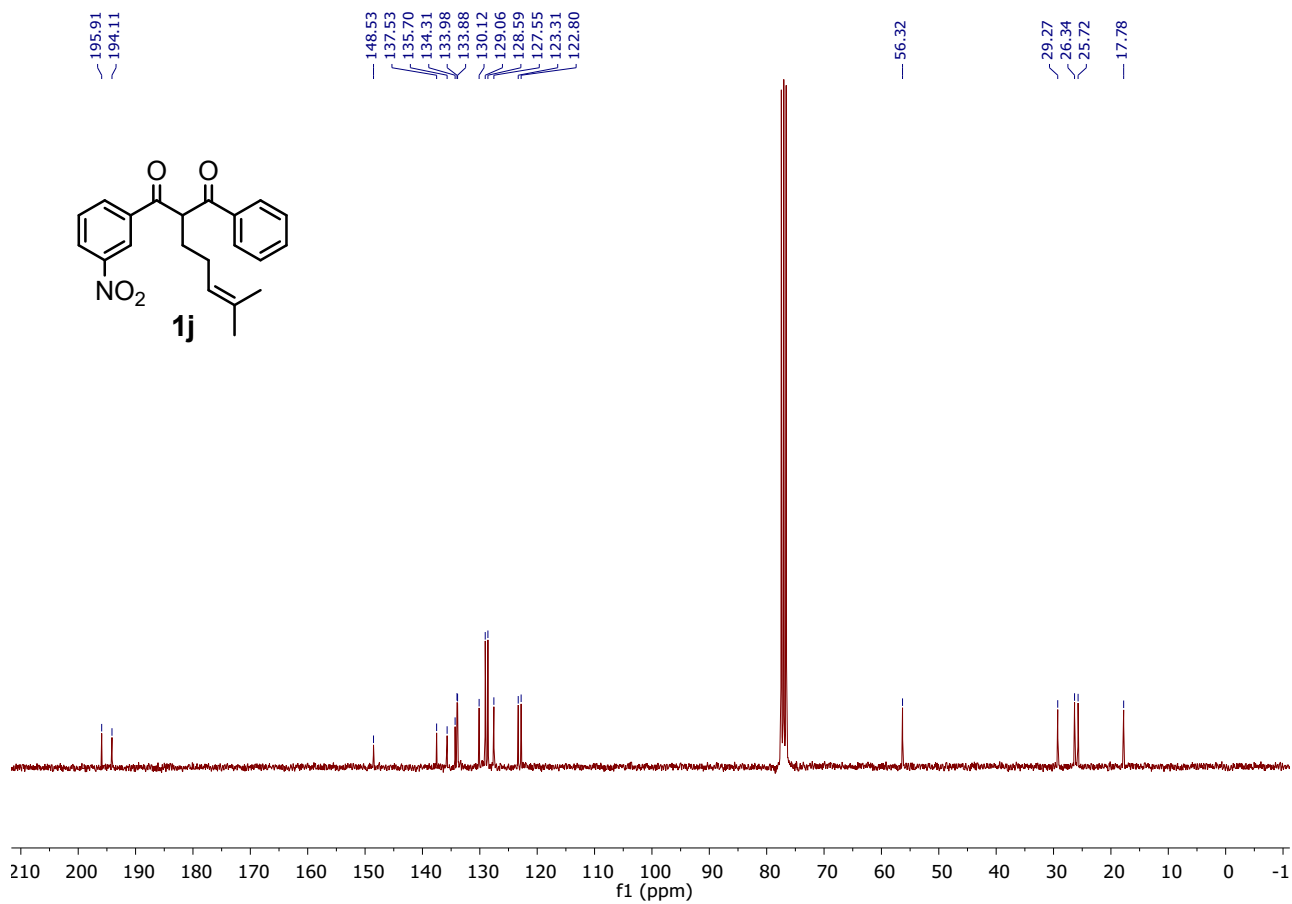

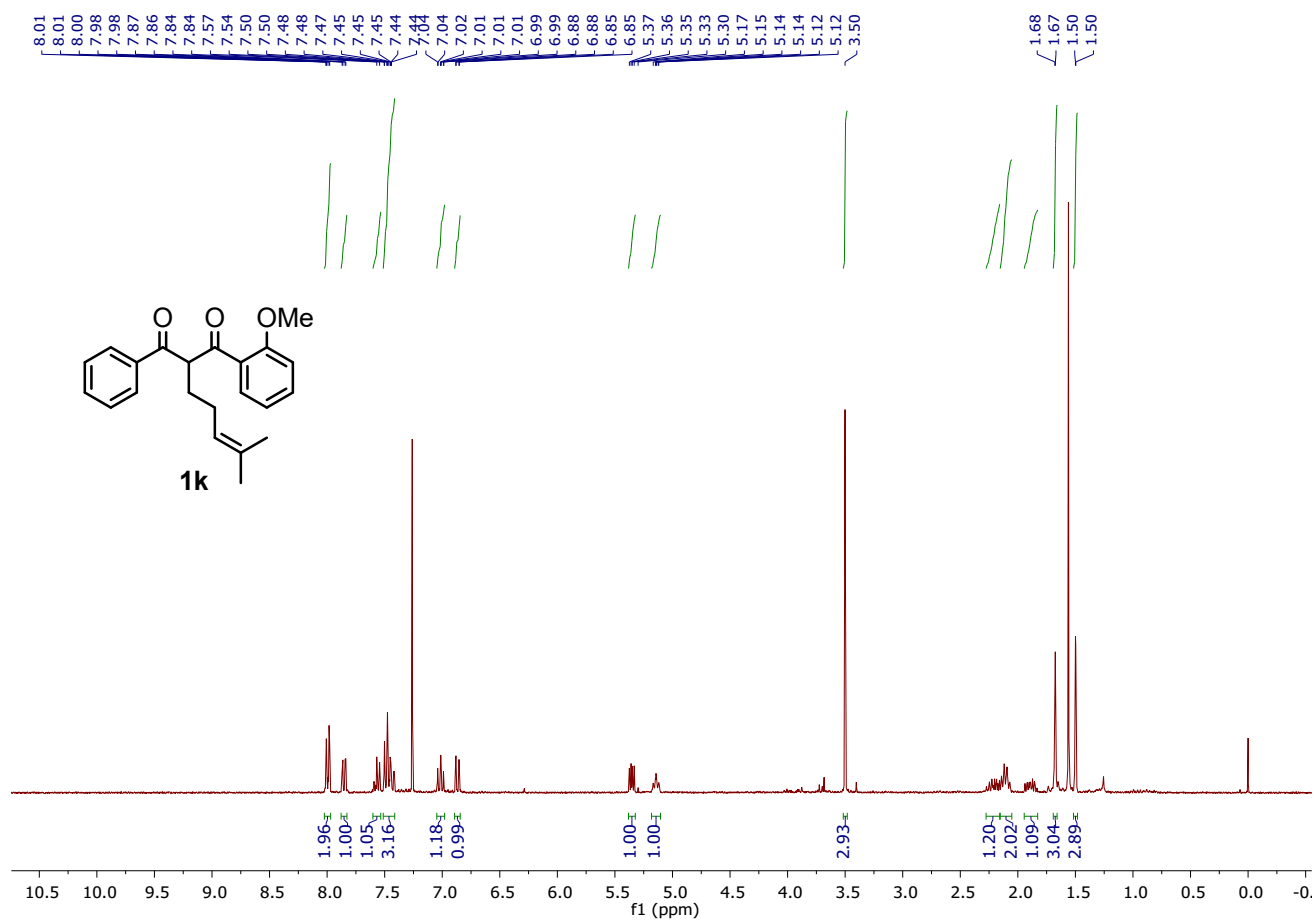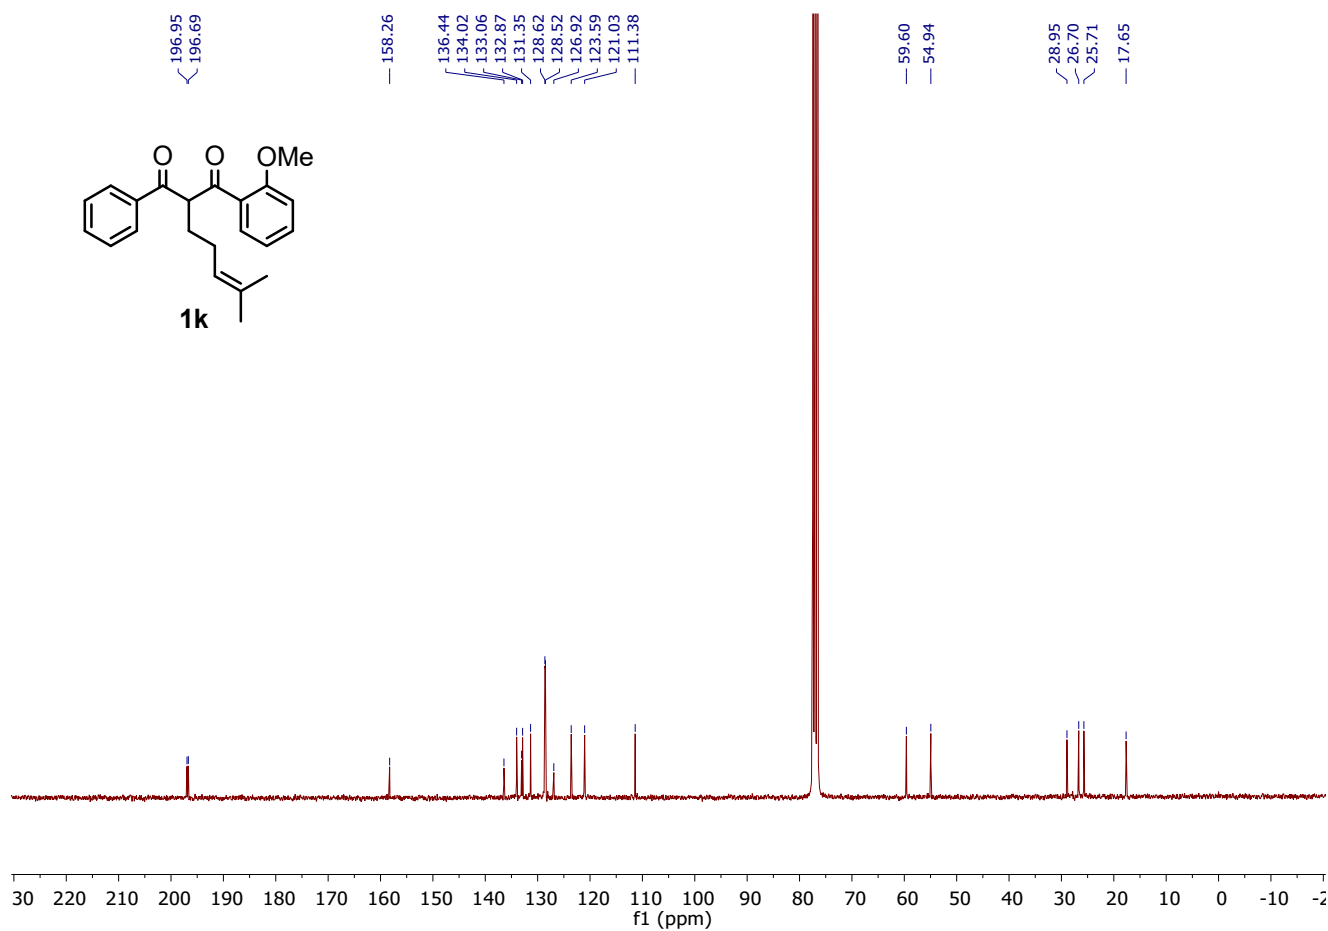



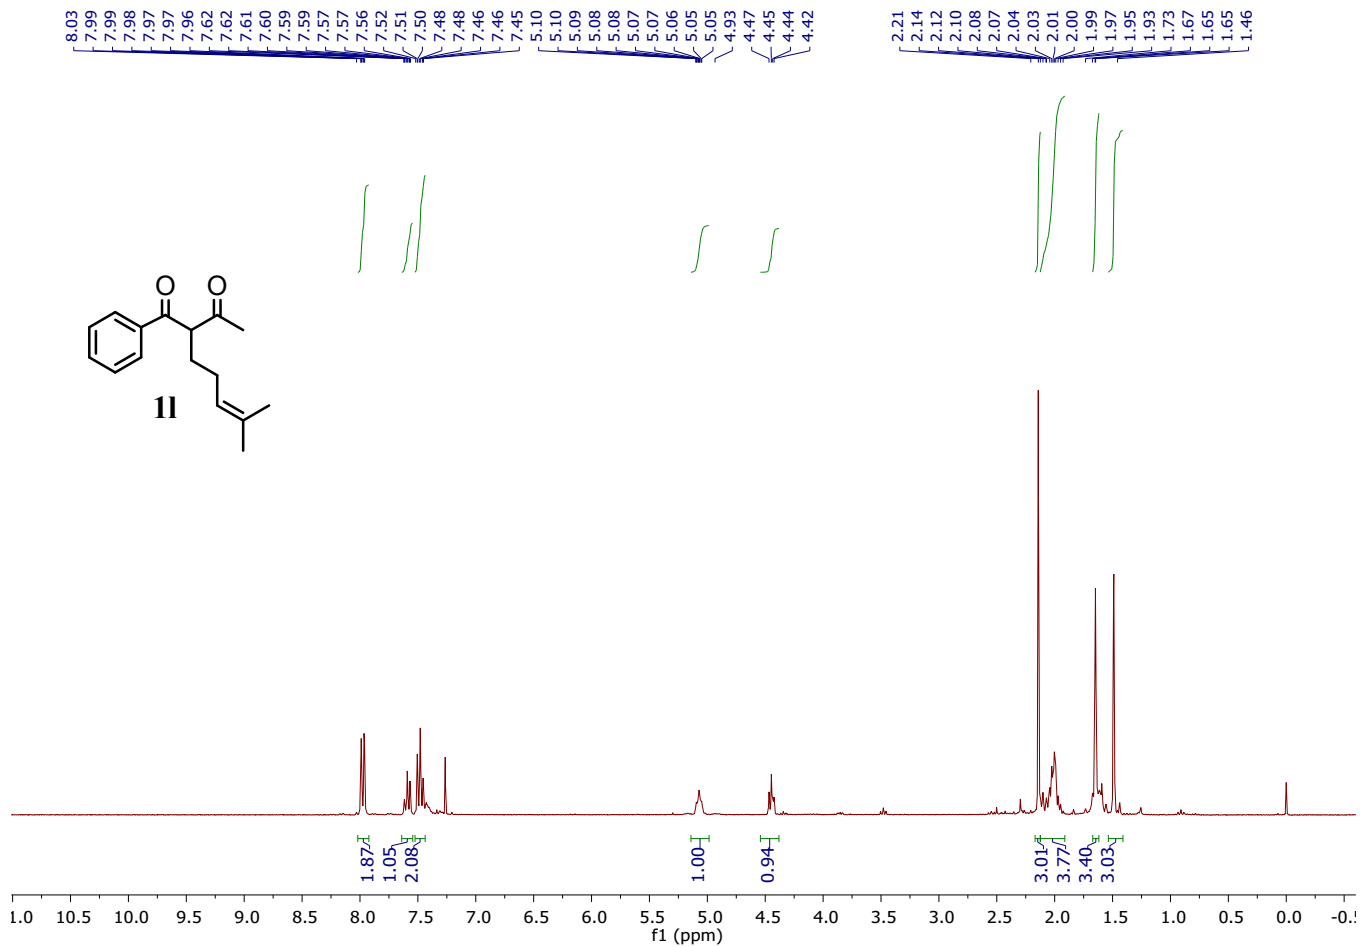

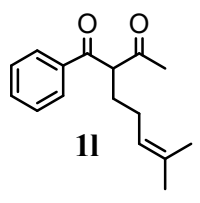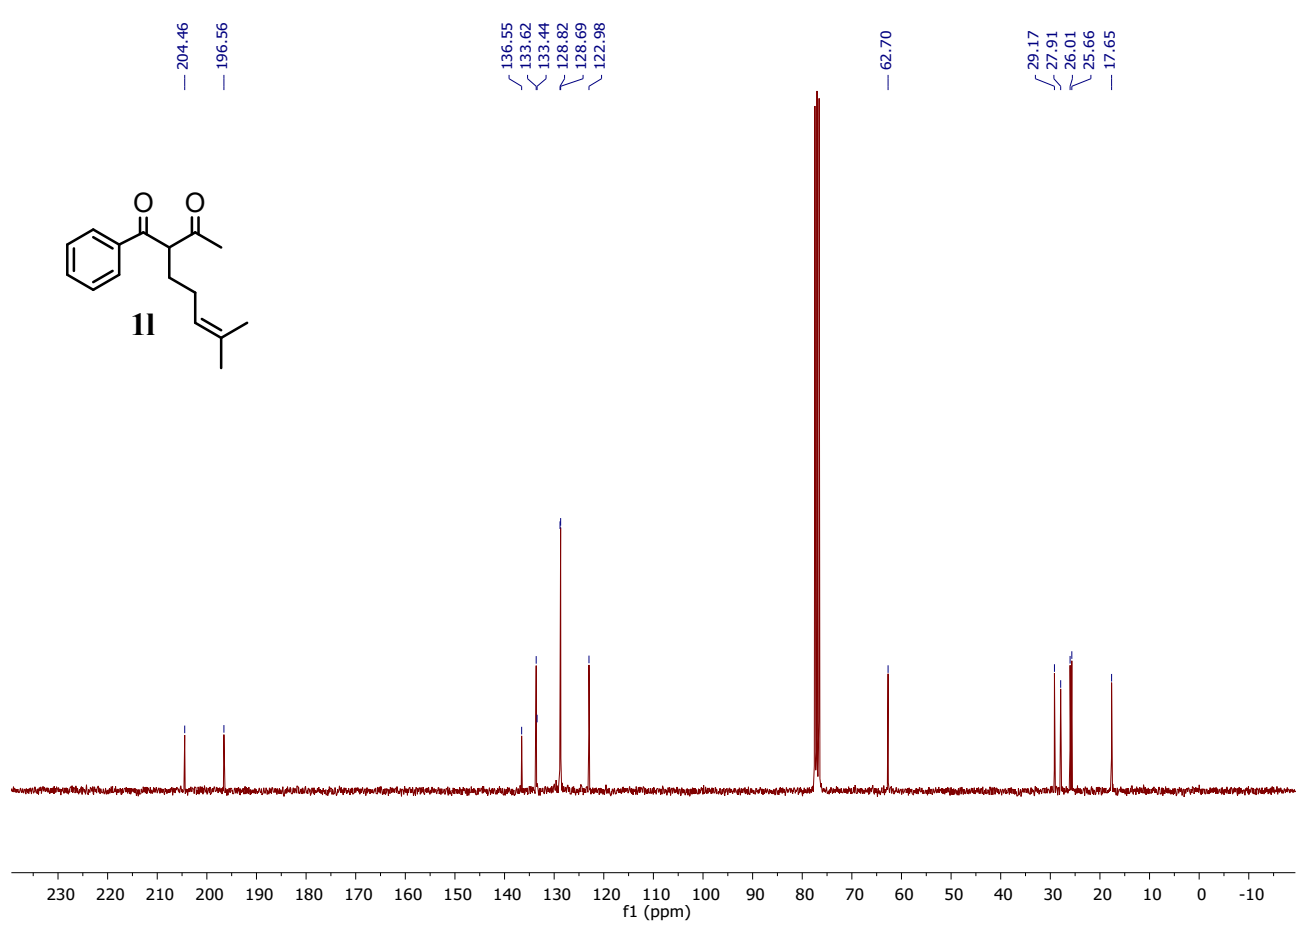

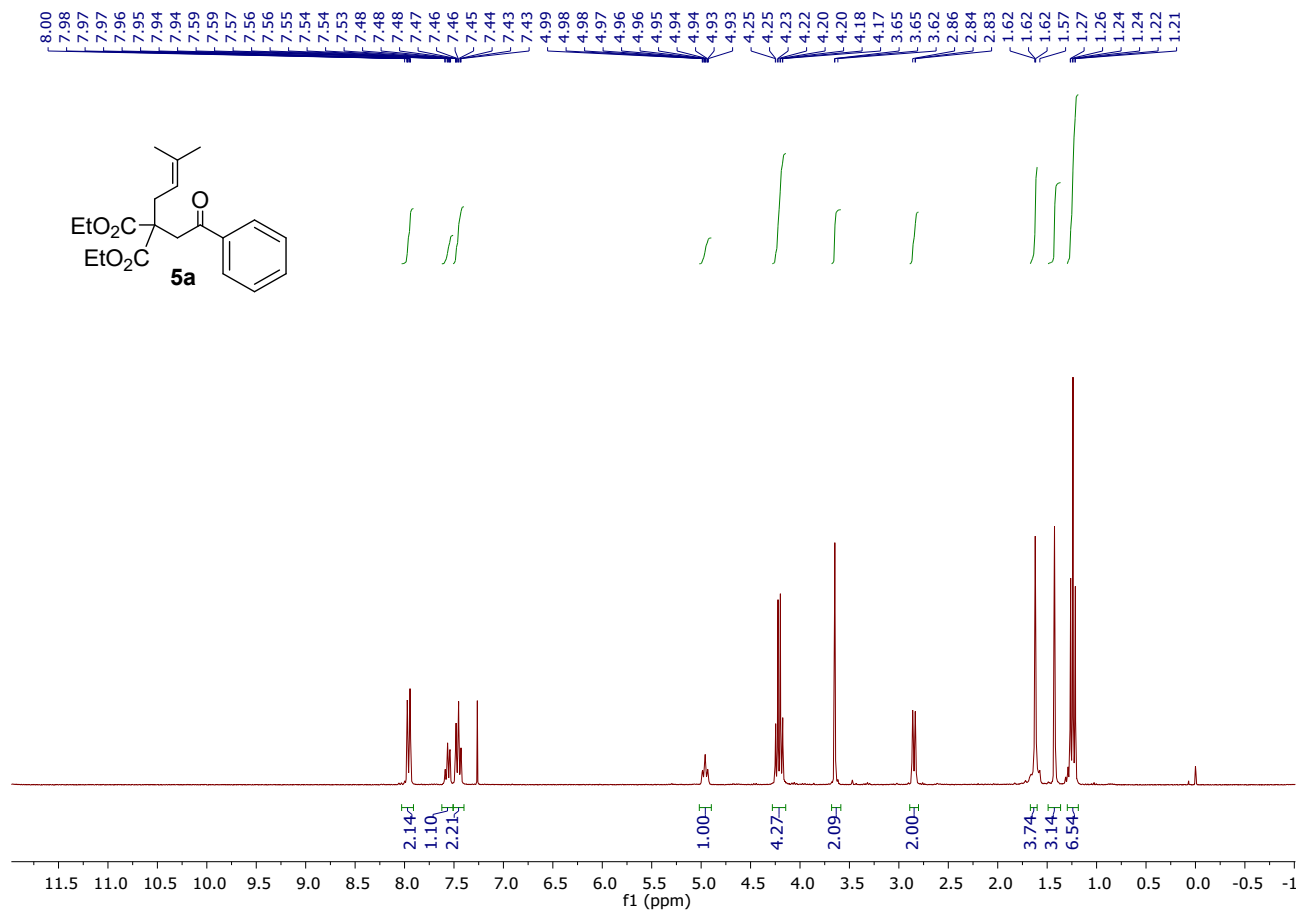

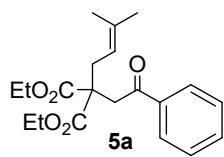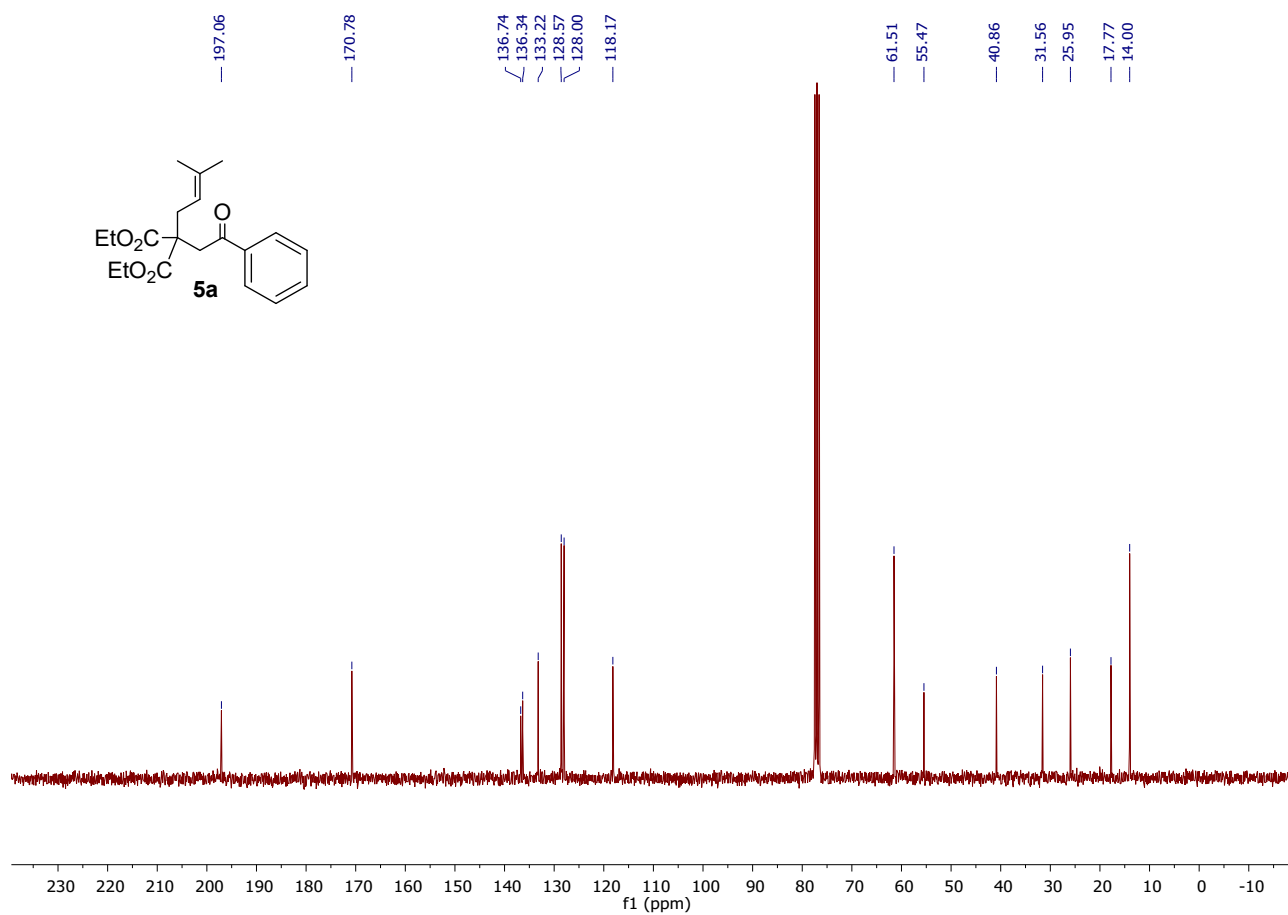

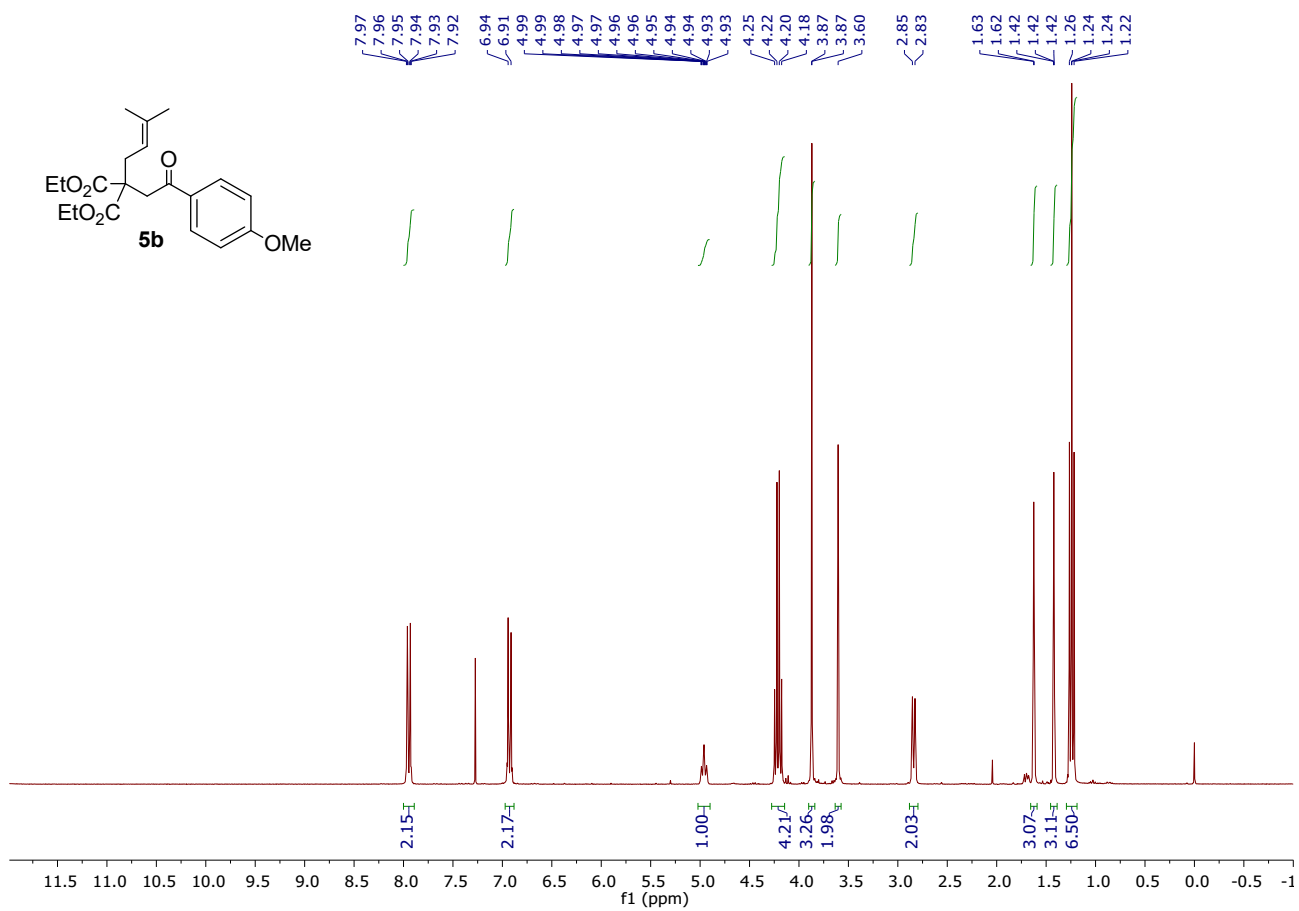

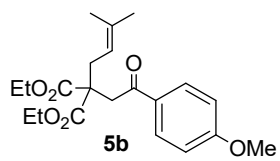

— 195.51

— 170.87

— 163.58

— 136.23

— 130.28

— 129.86

— 118.24

— 113.68

— 61.43

— 55.47

— 40.45

— 31.51

— 25.96

— 17.76

— 14.00

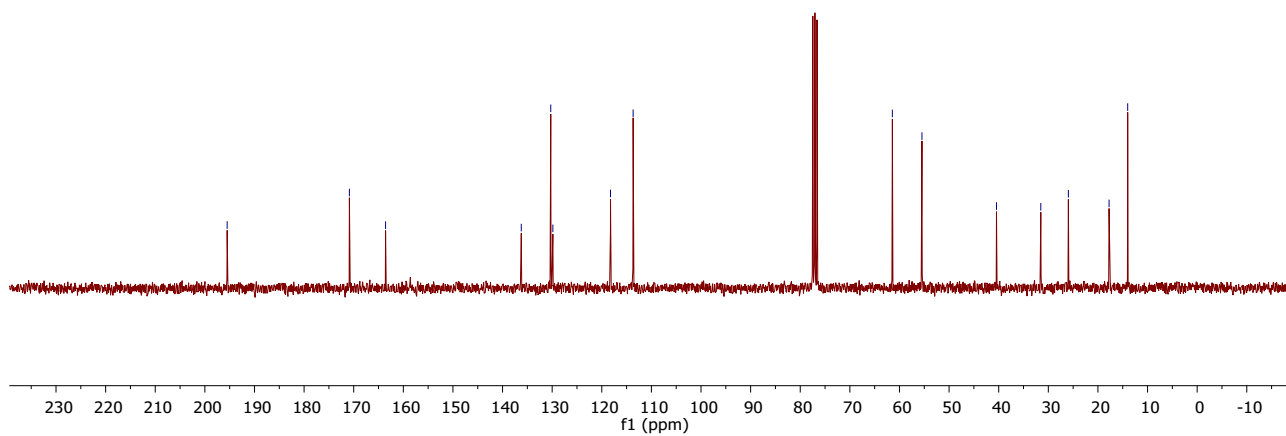

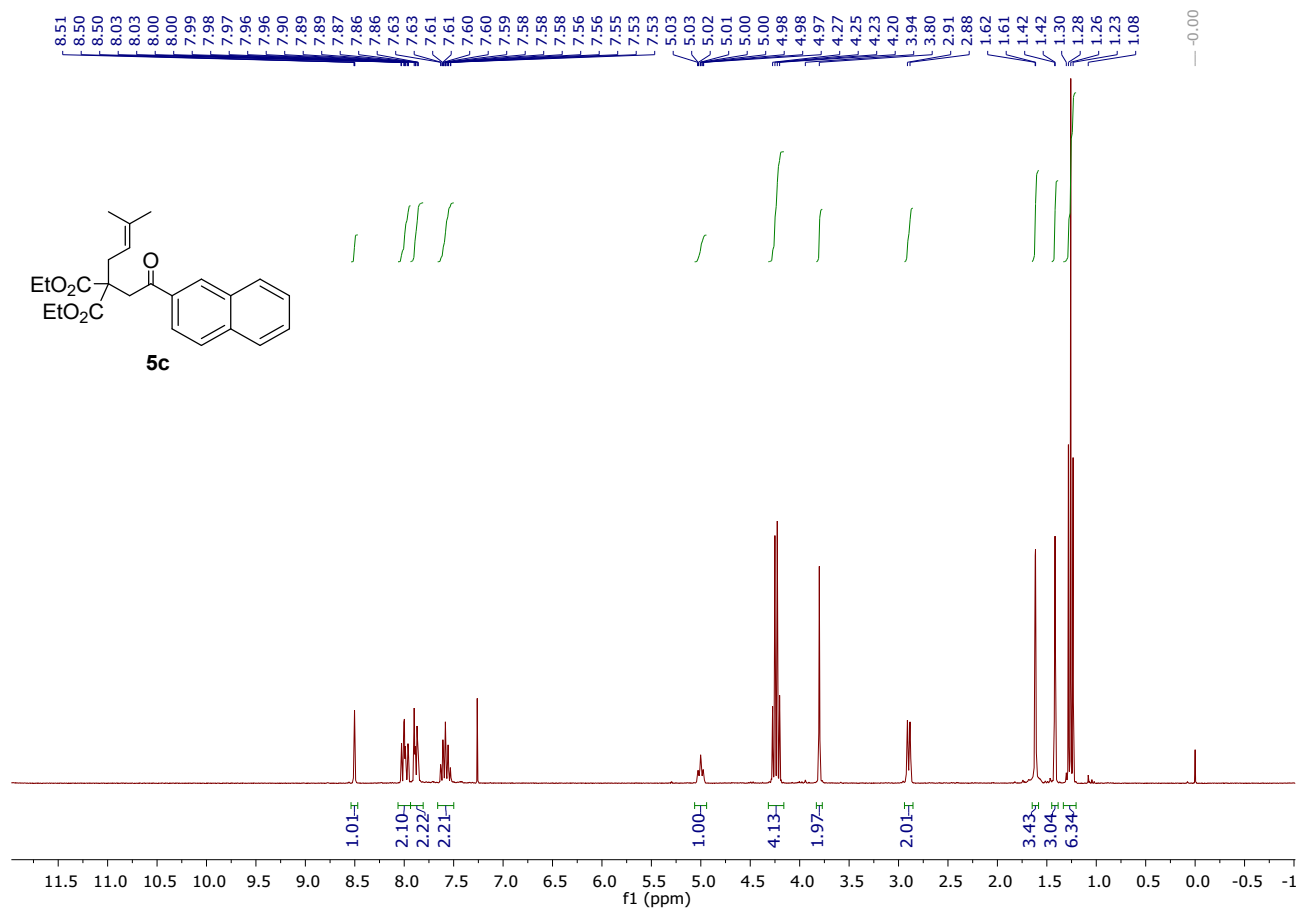

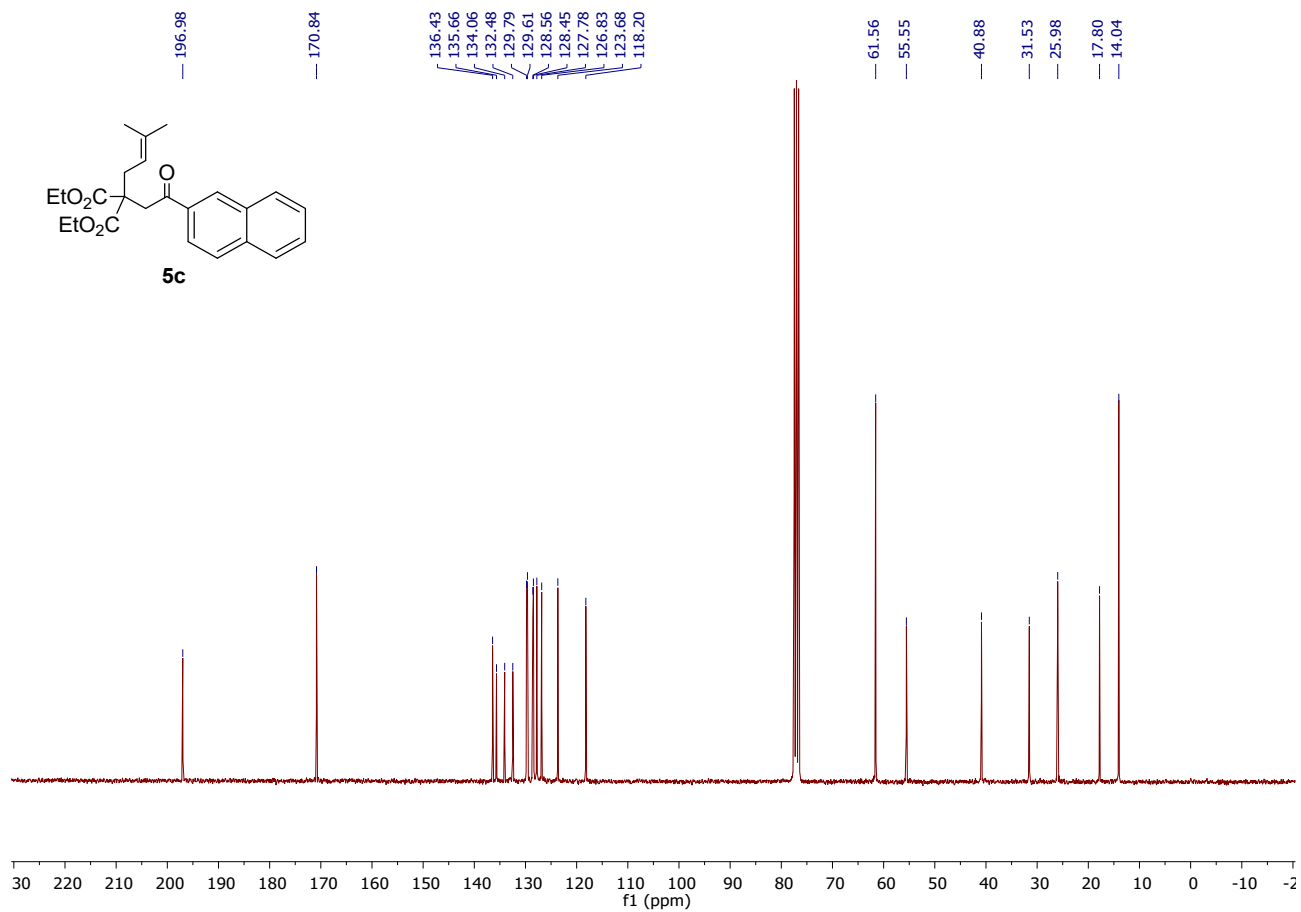



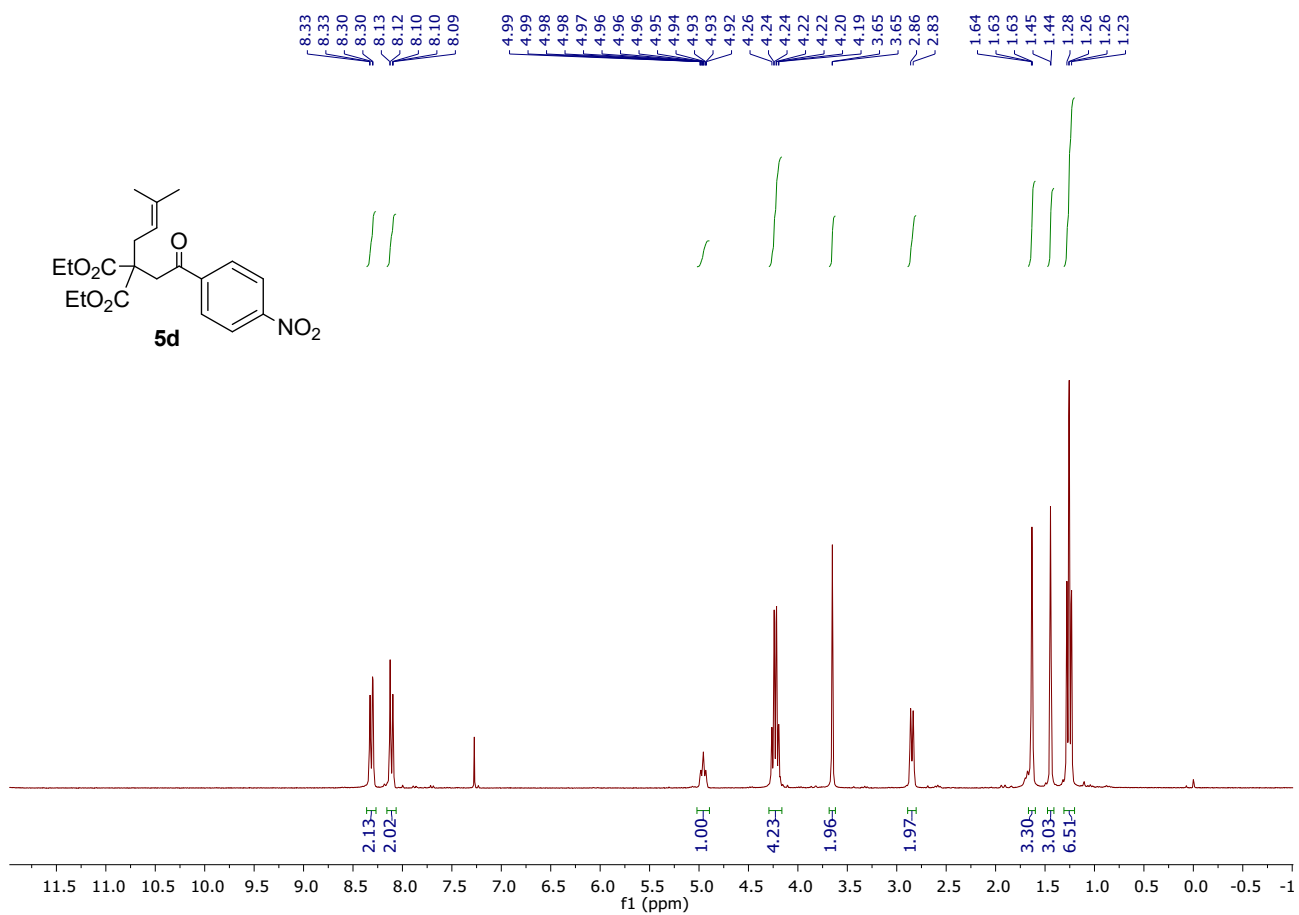

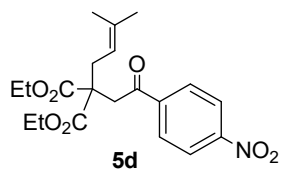

— 196.52

— 171.25

— 151.22

— 141.90

— 137.46

— 129.83

— 124.66

— 118.74

— 62.53

— 56.41

— 42.19

— 32.48

— 26.75

— 18.60

— 14.79

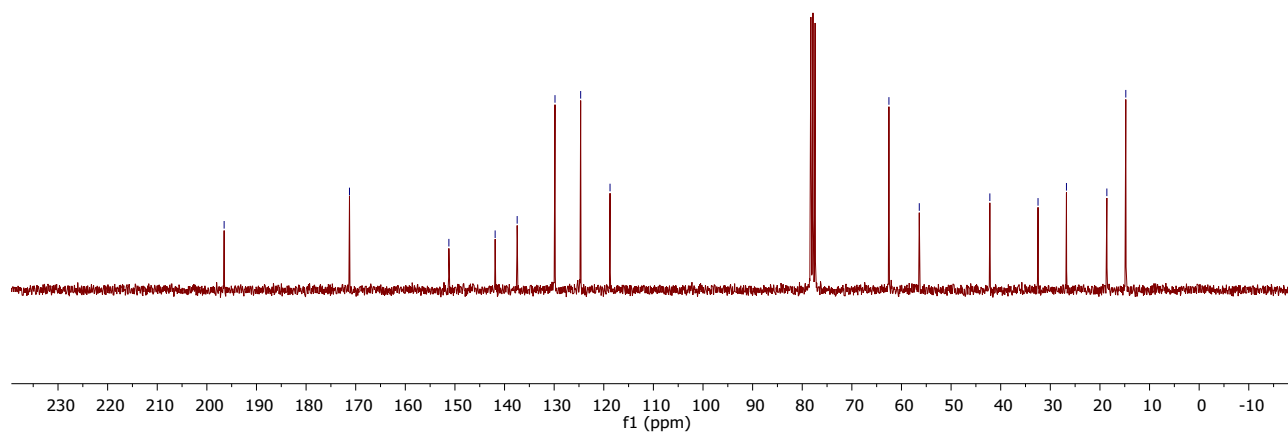

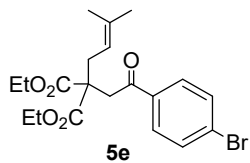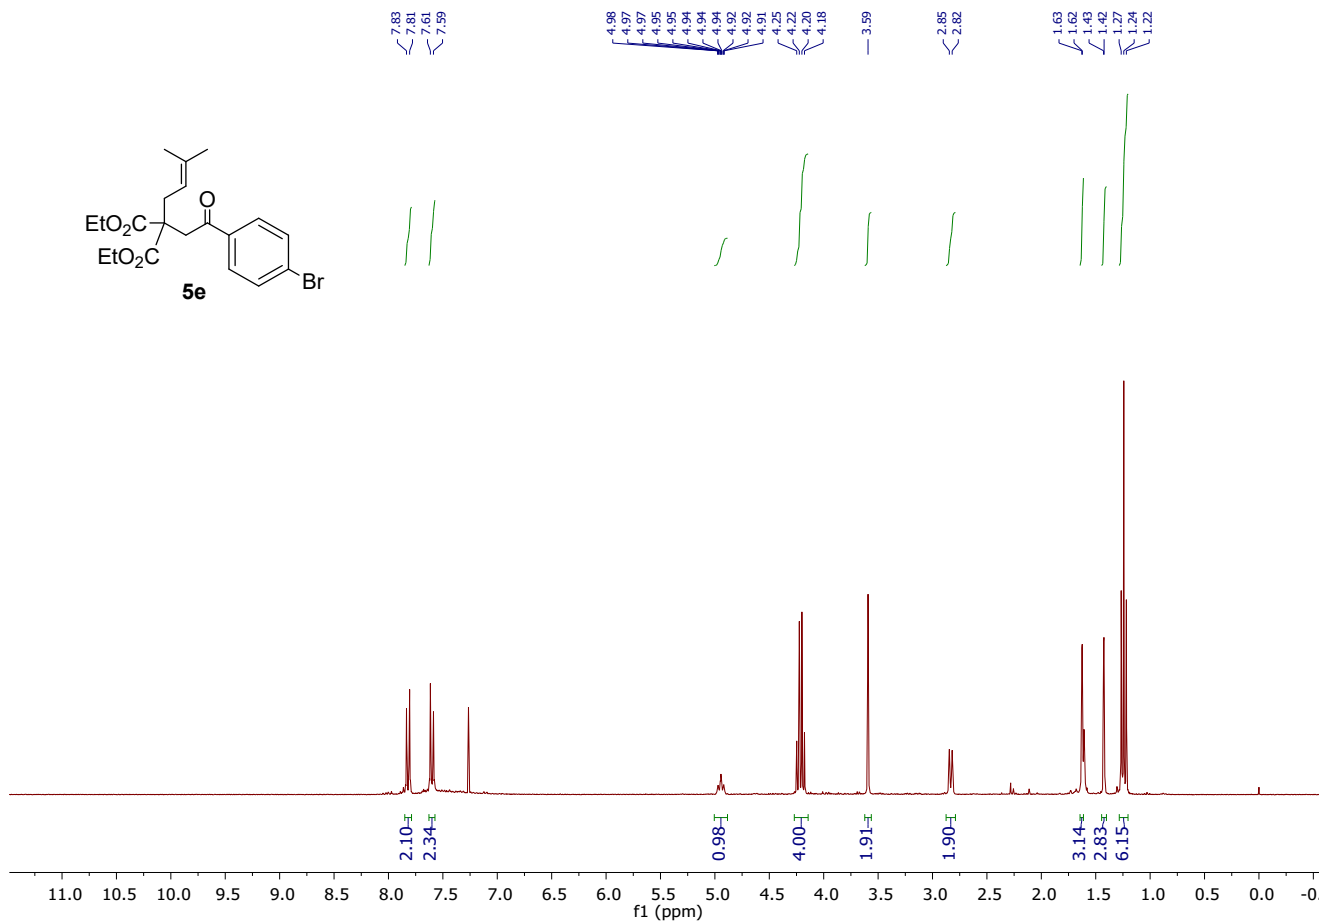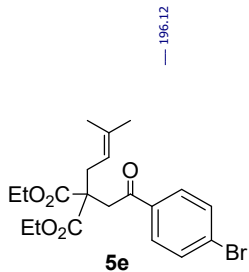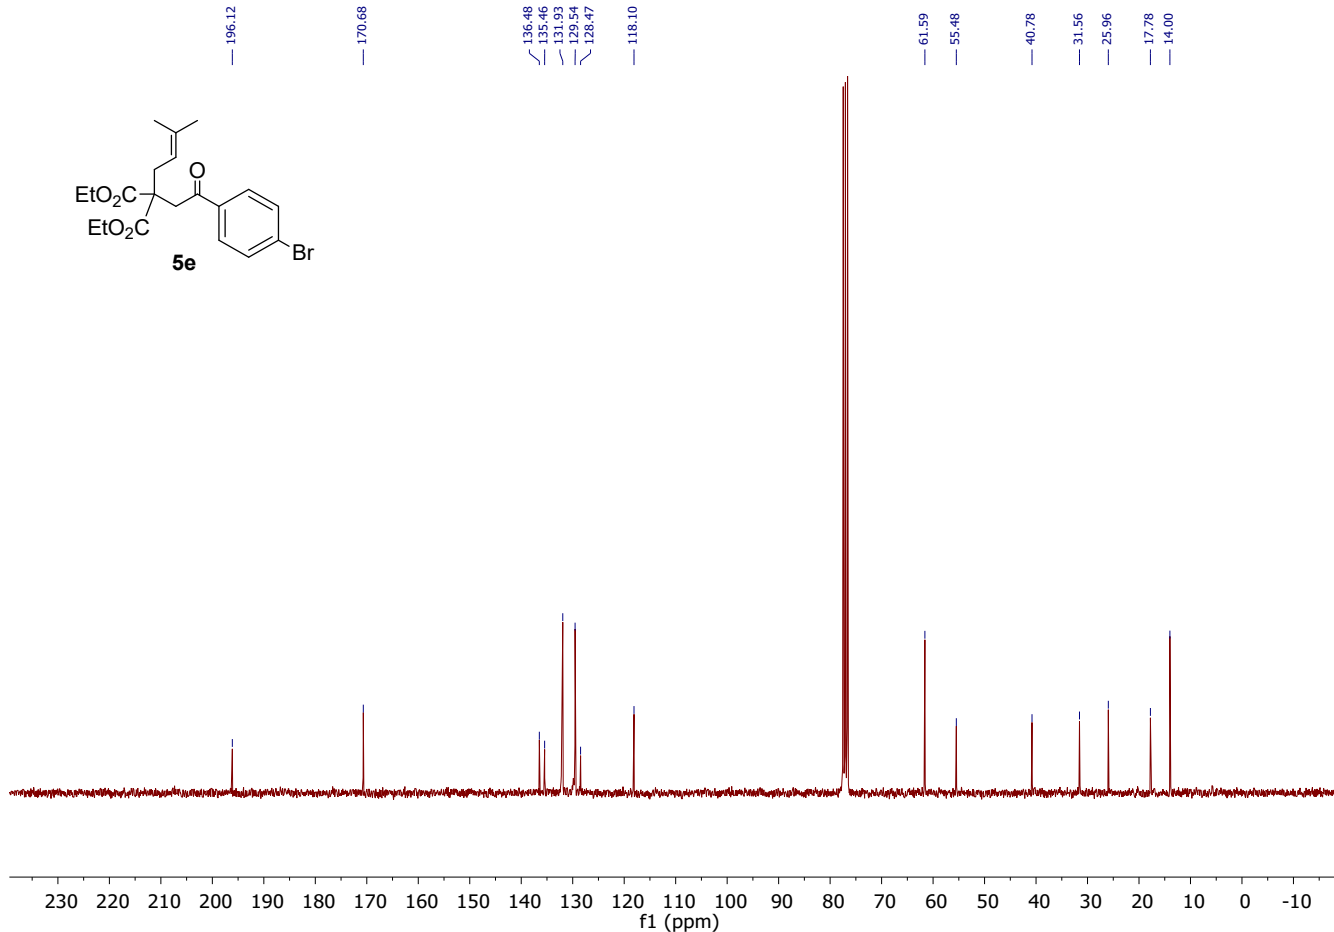

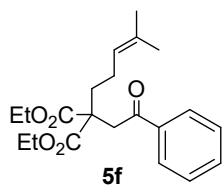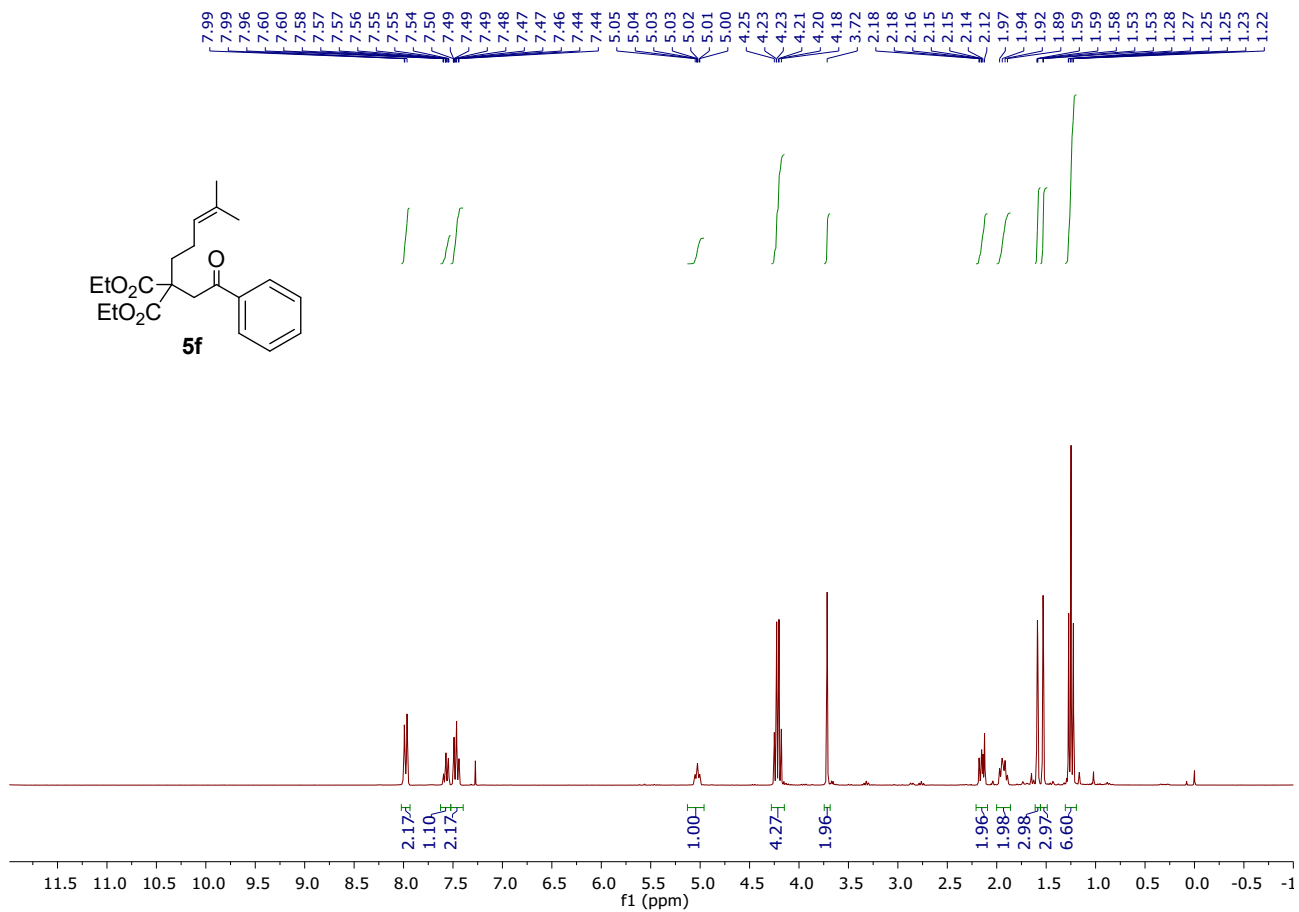

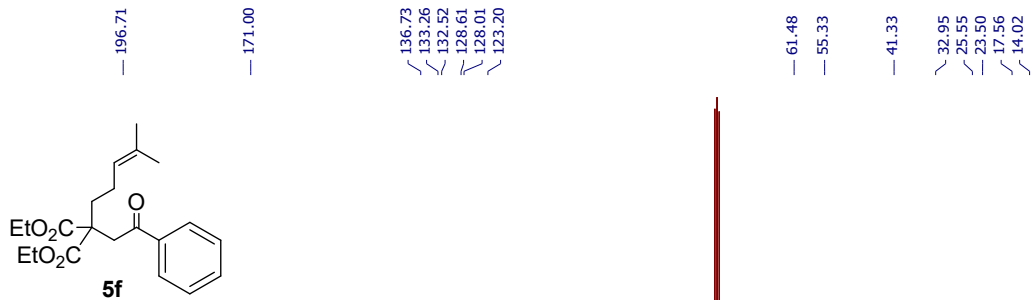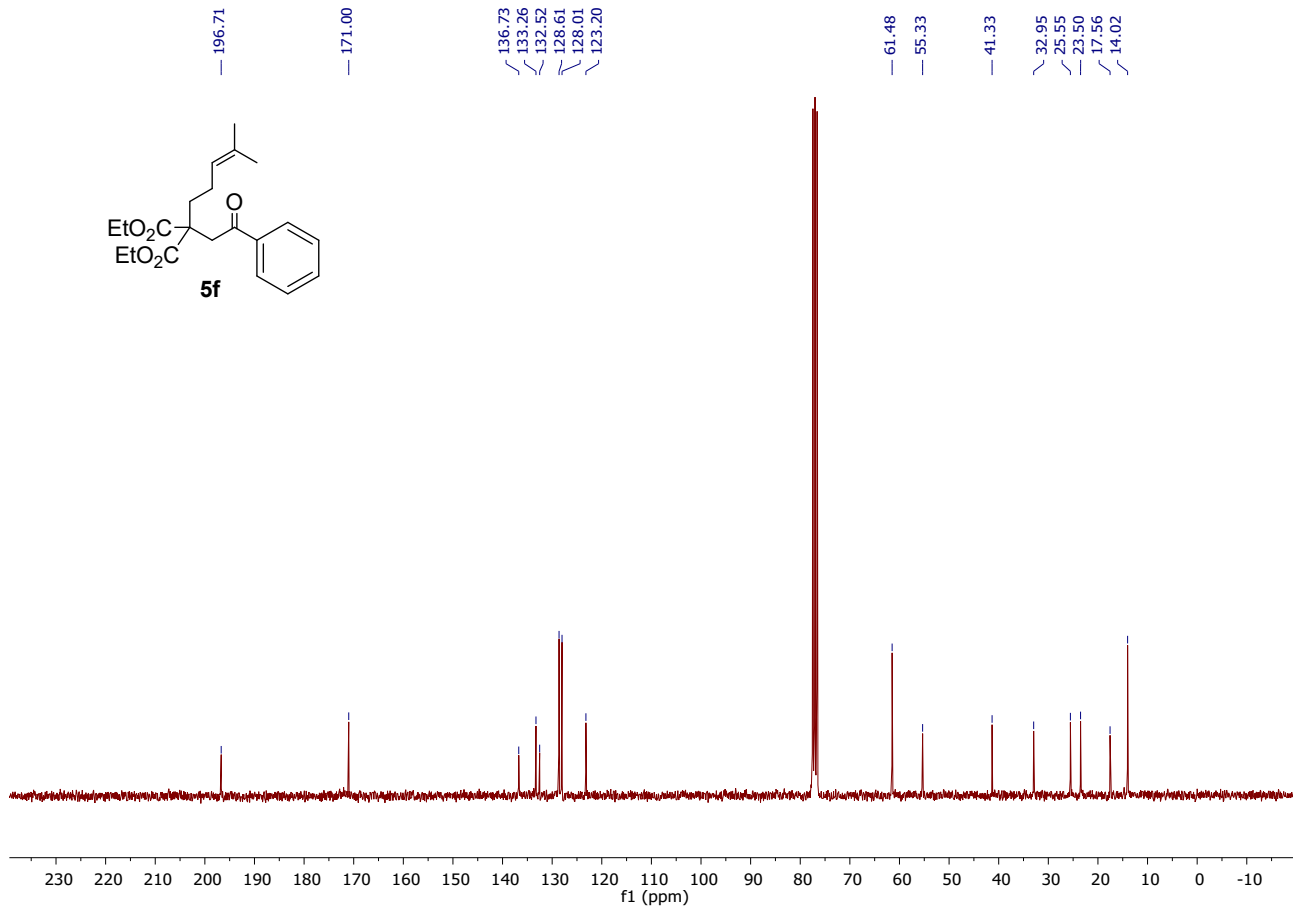

MCP-013c2.fid  
 20230616 11:01:11  
 Proton-26302 CDCl3 /opt/topspin2 daupan 55

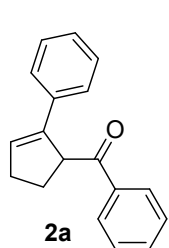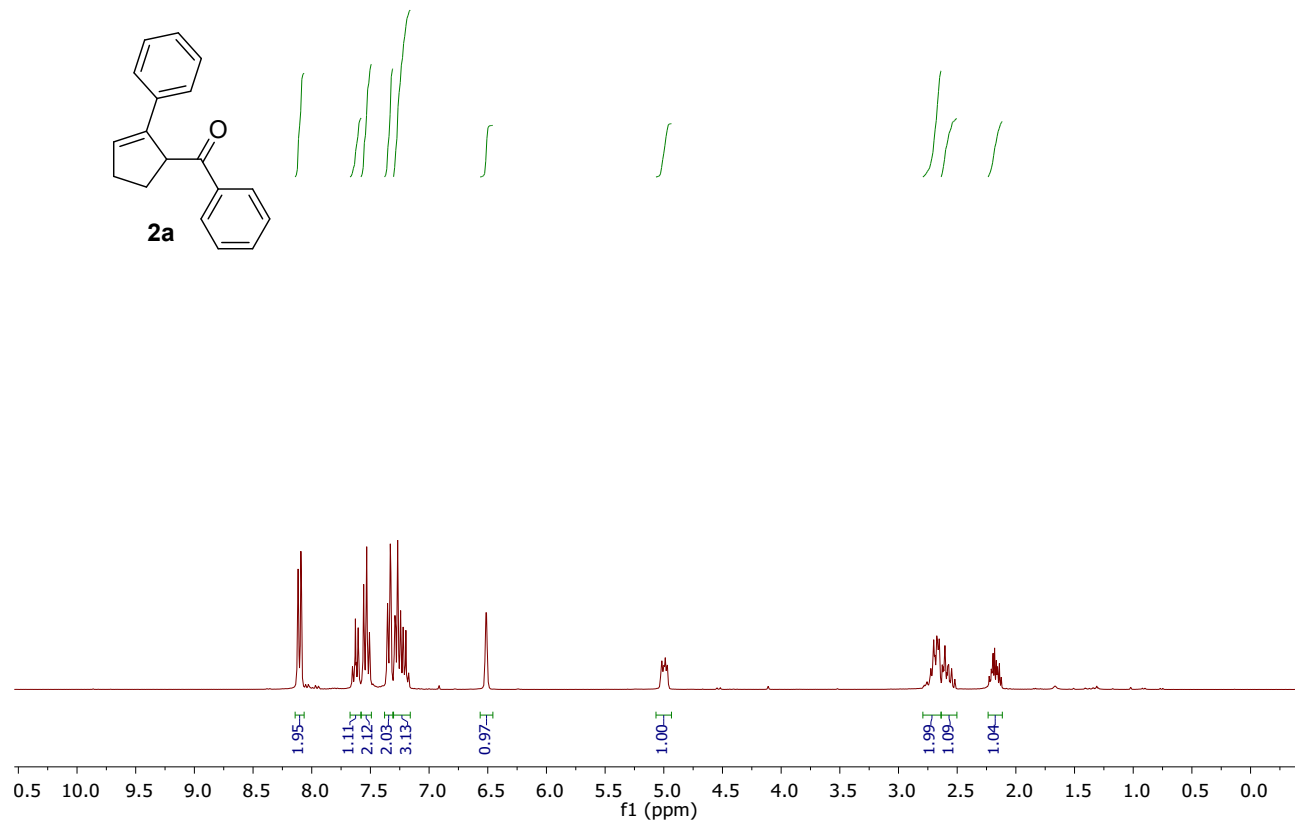

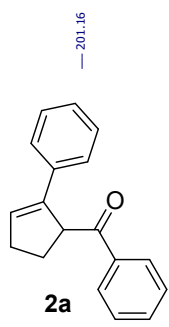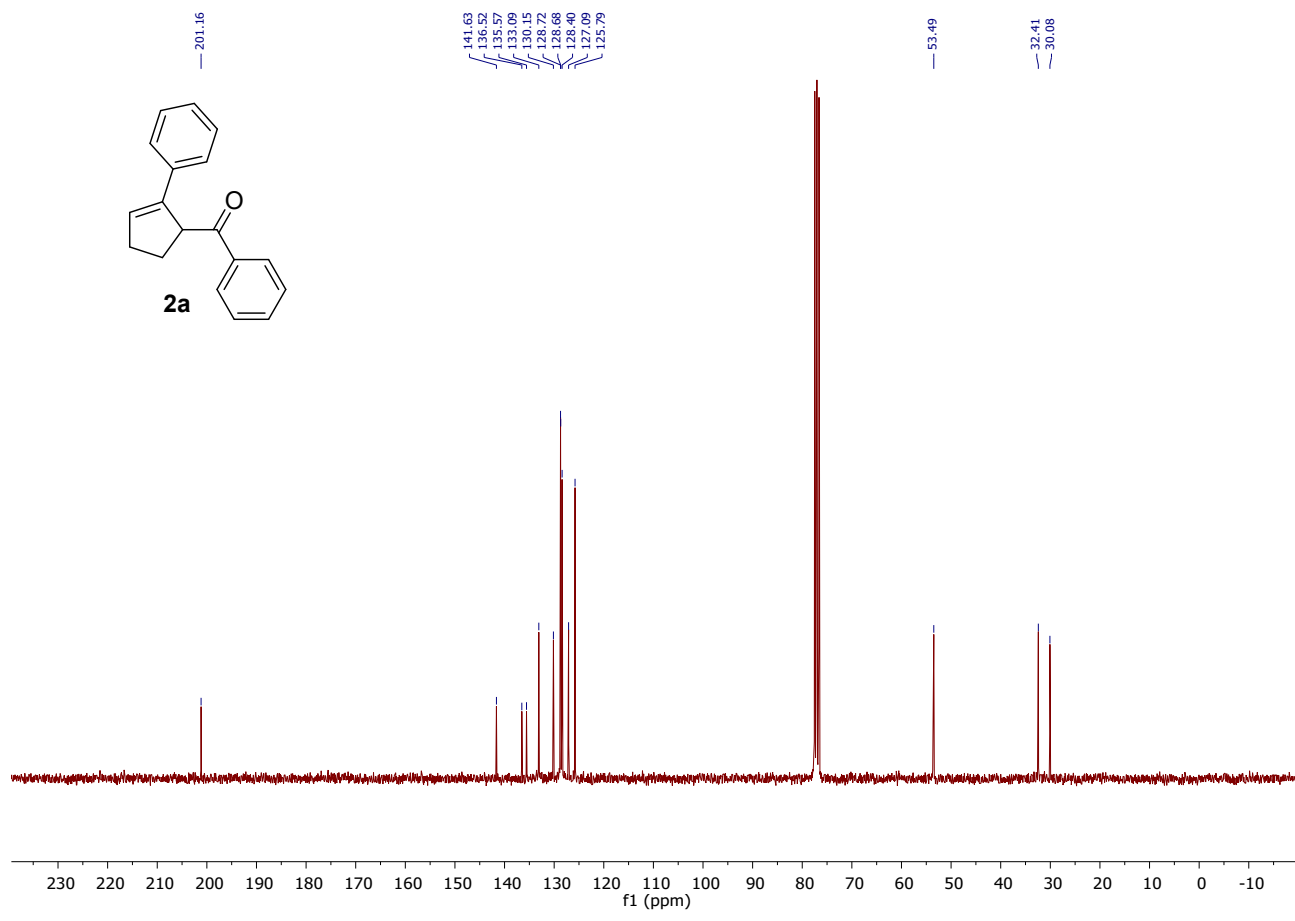

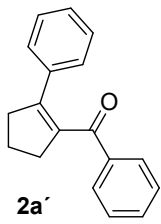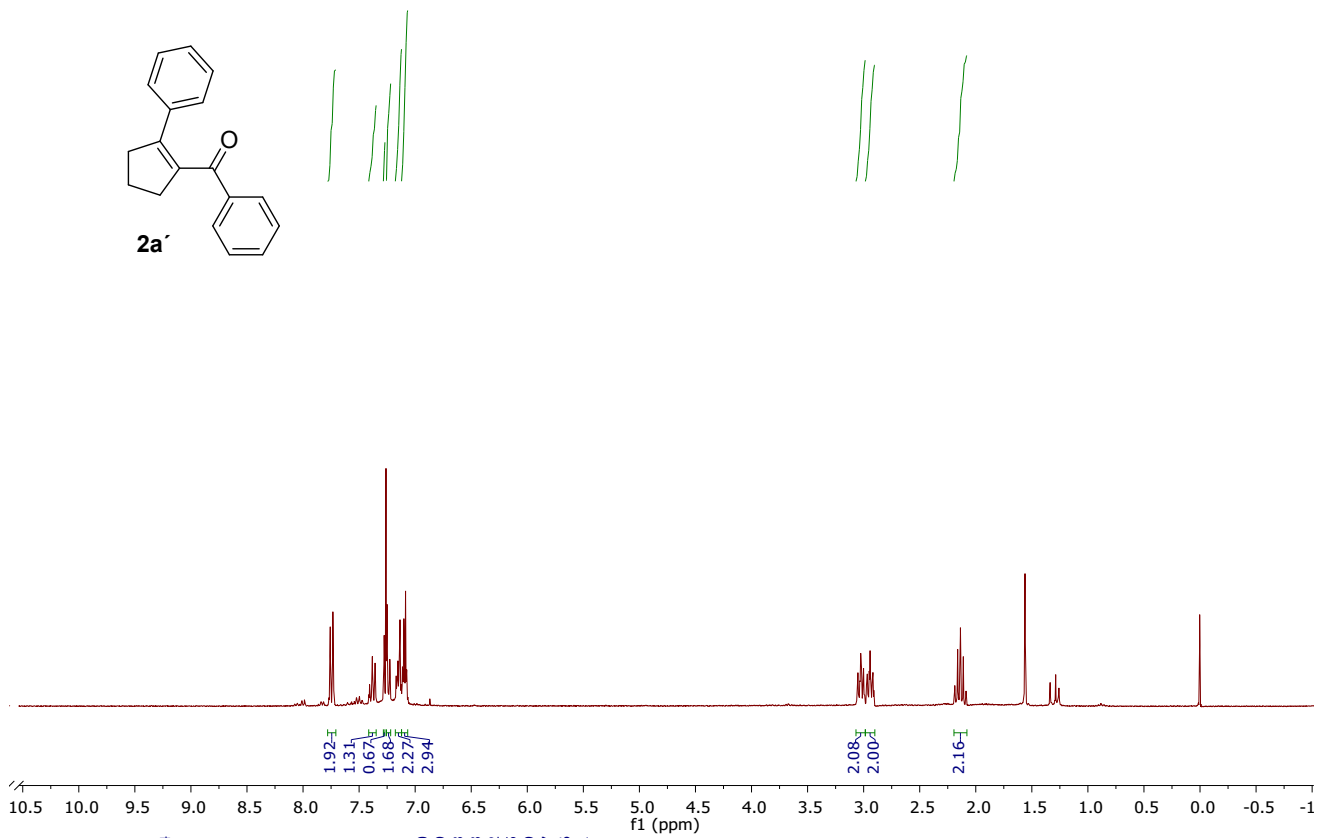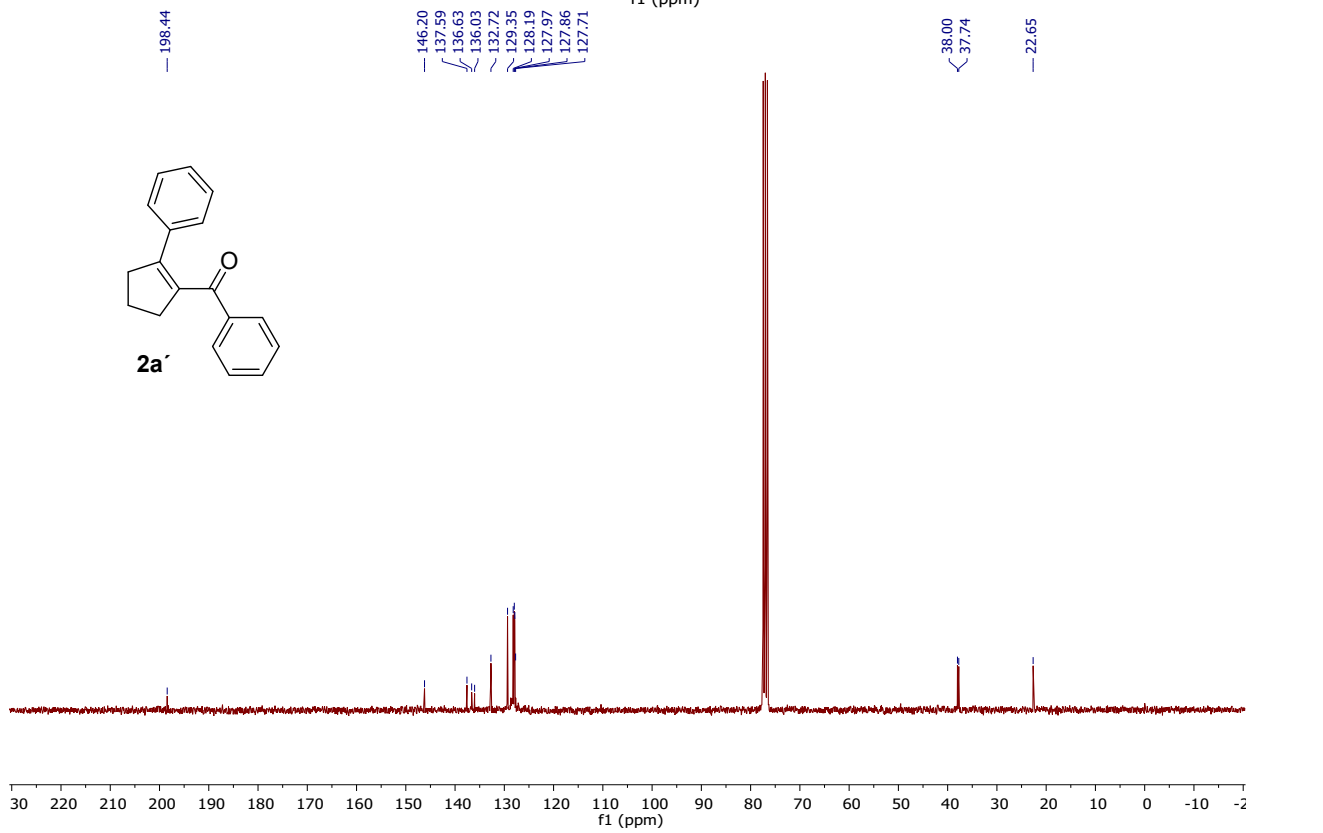

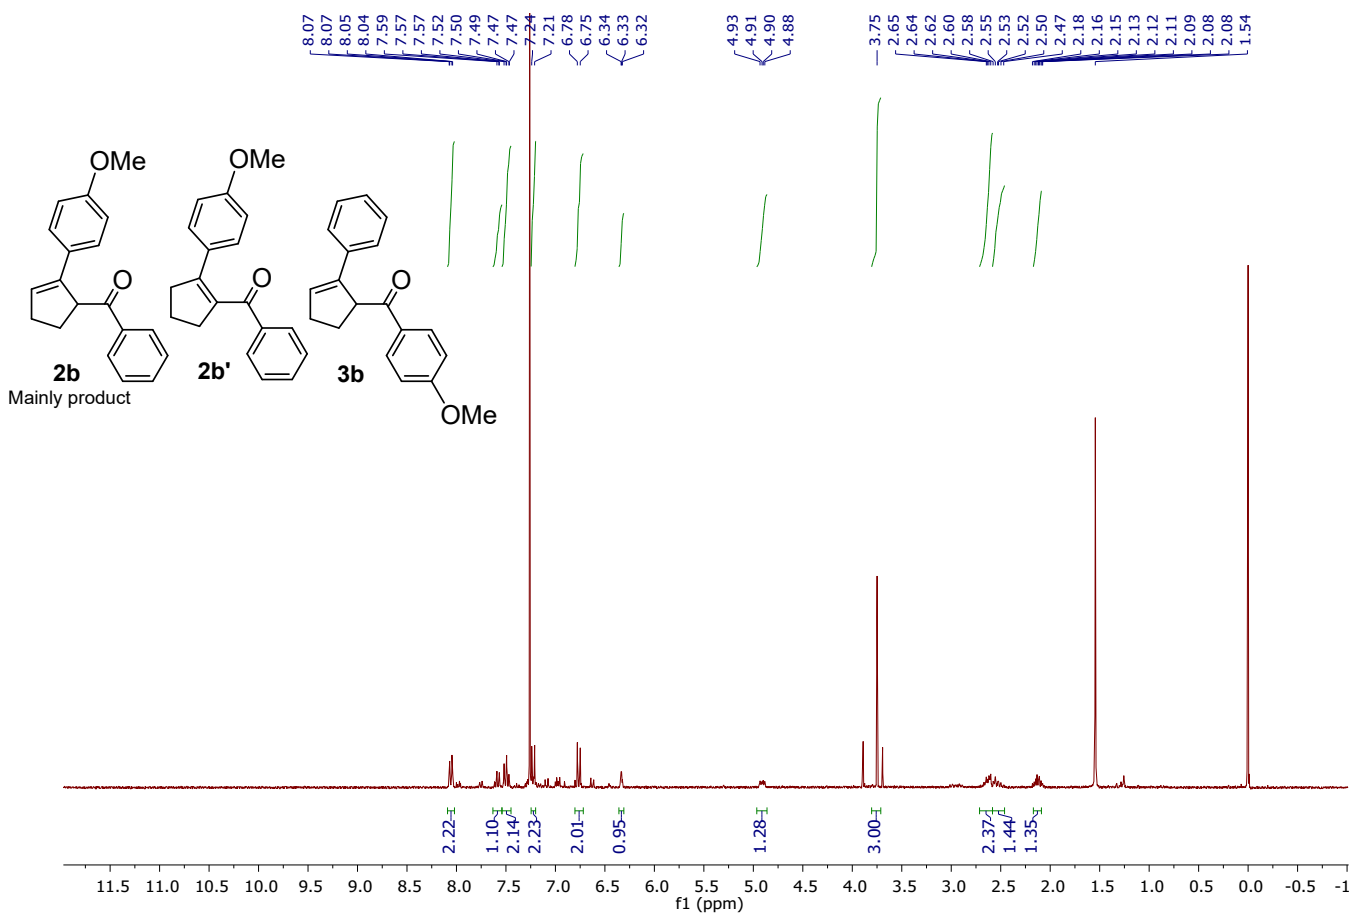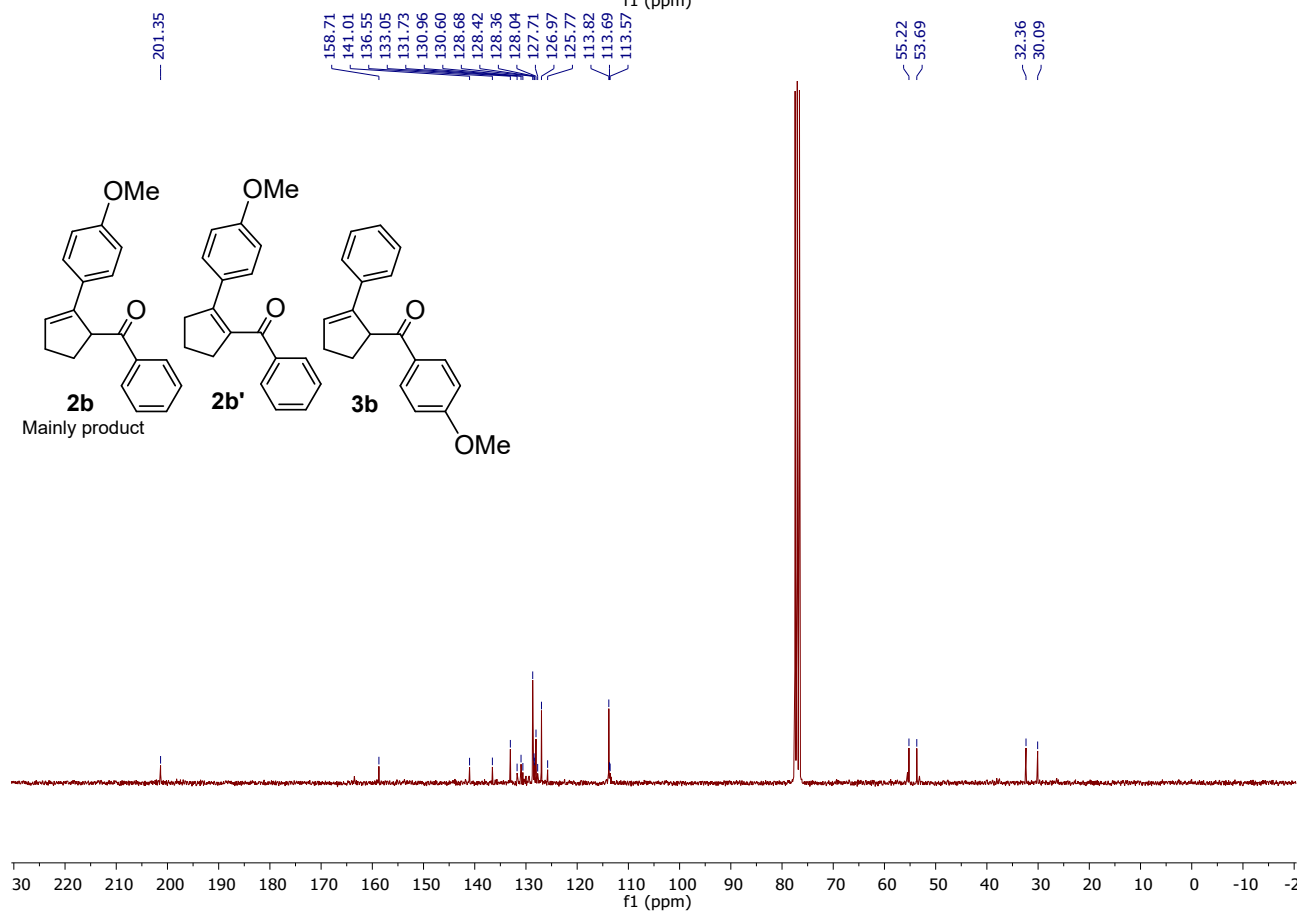



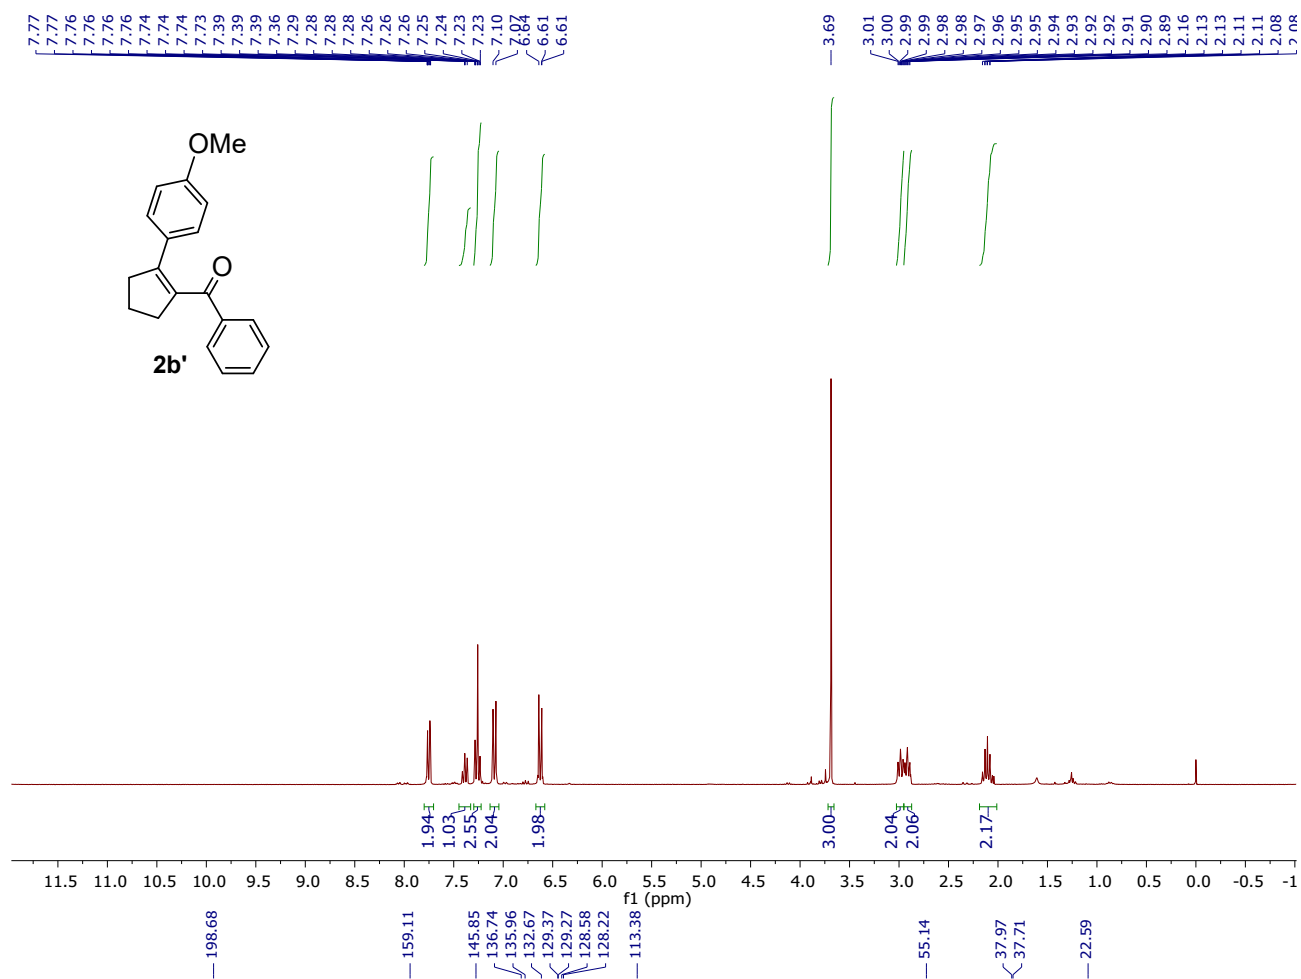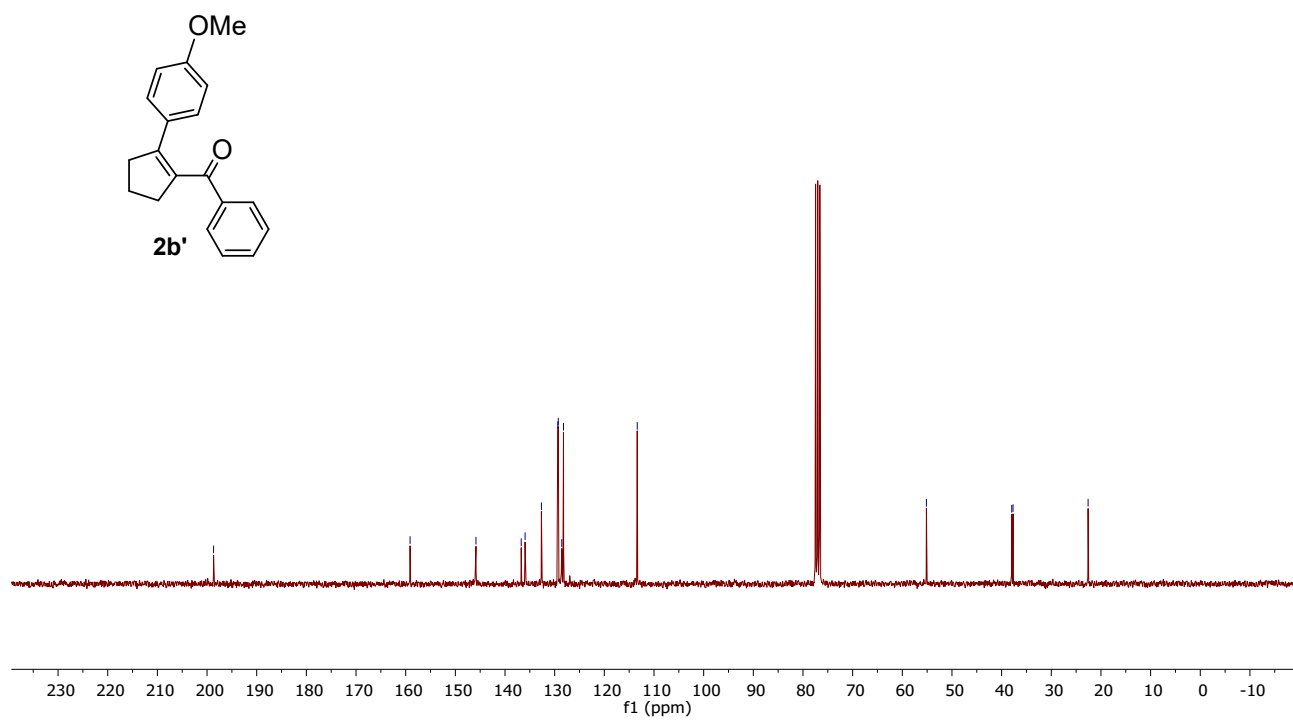

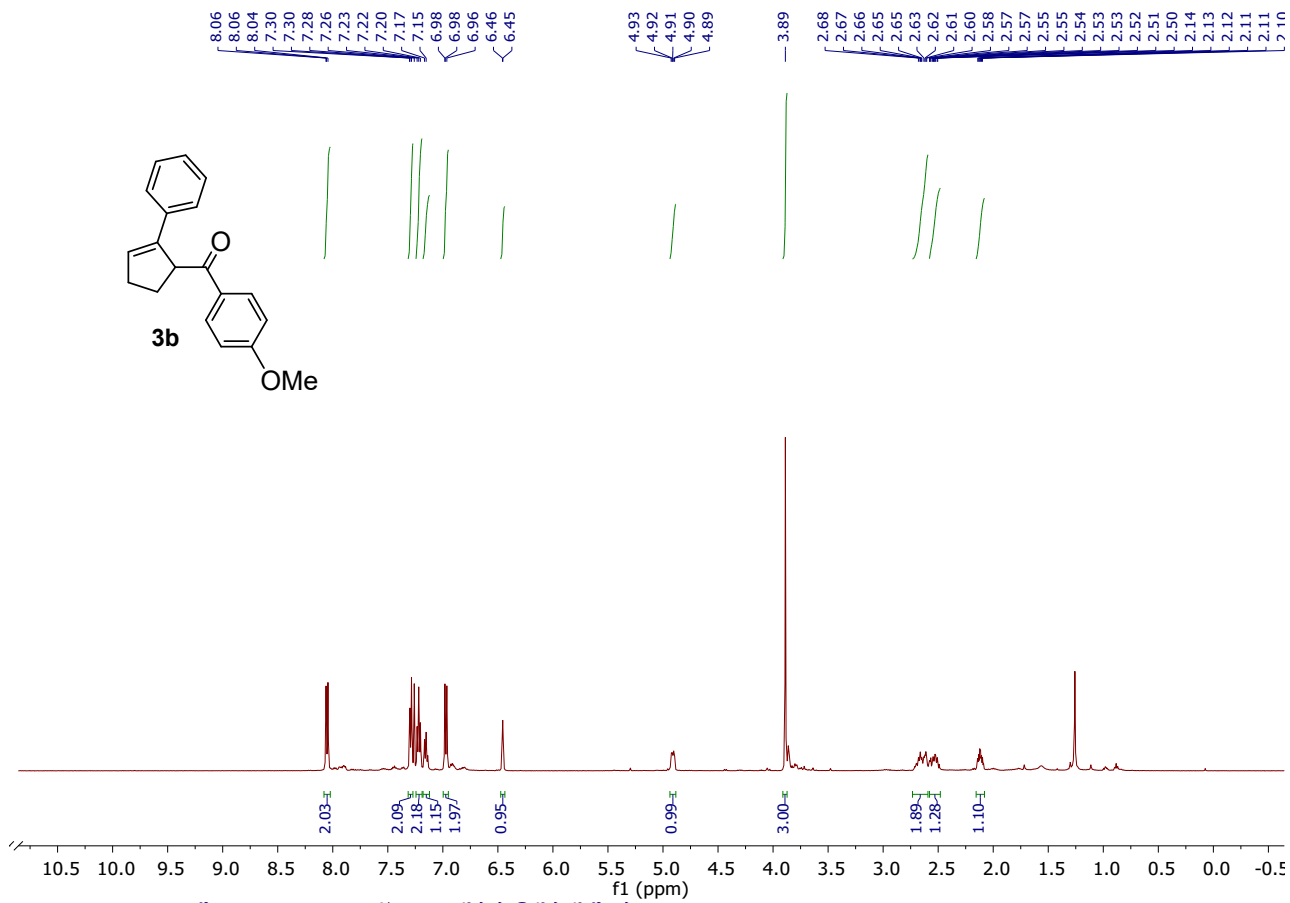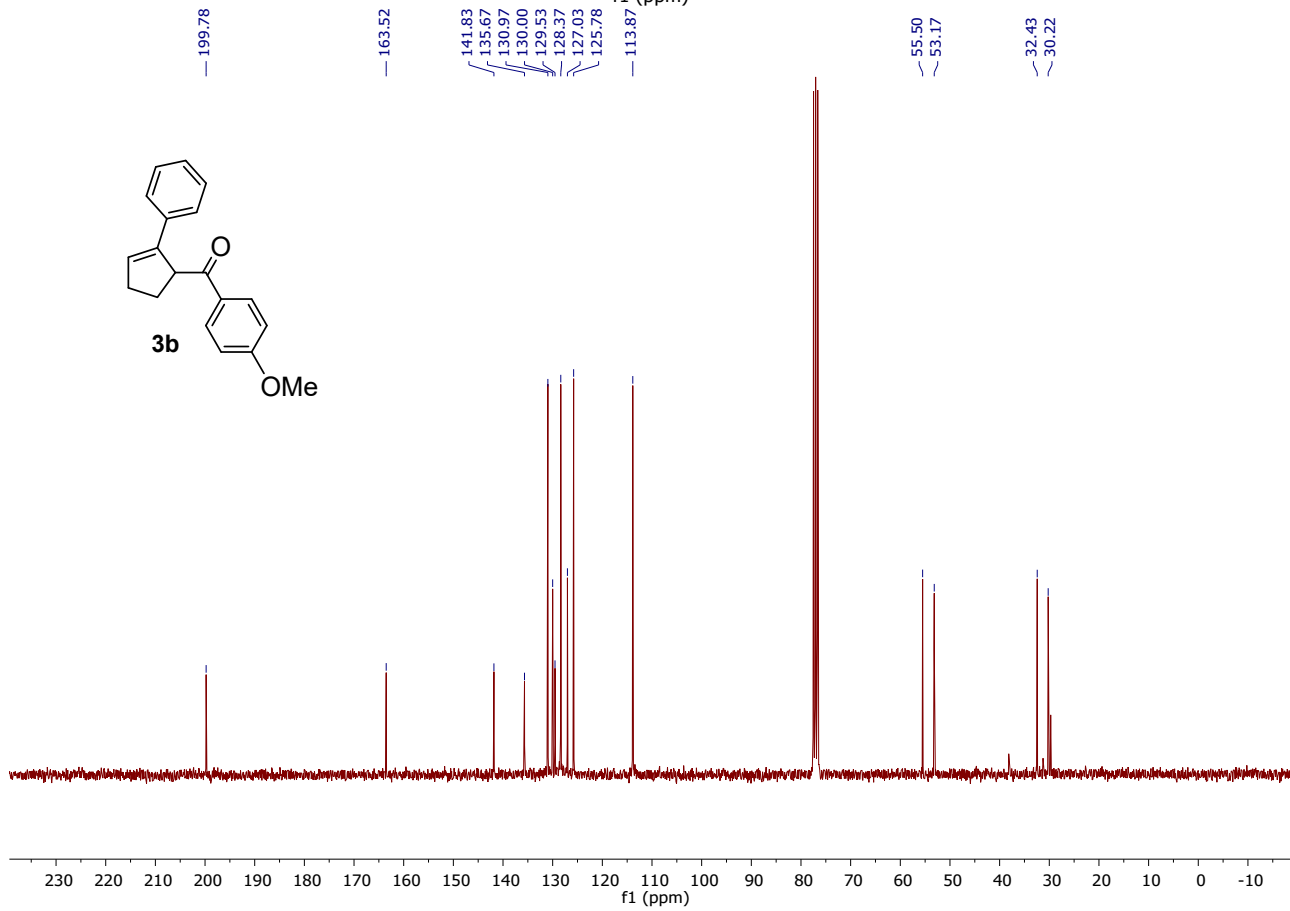

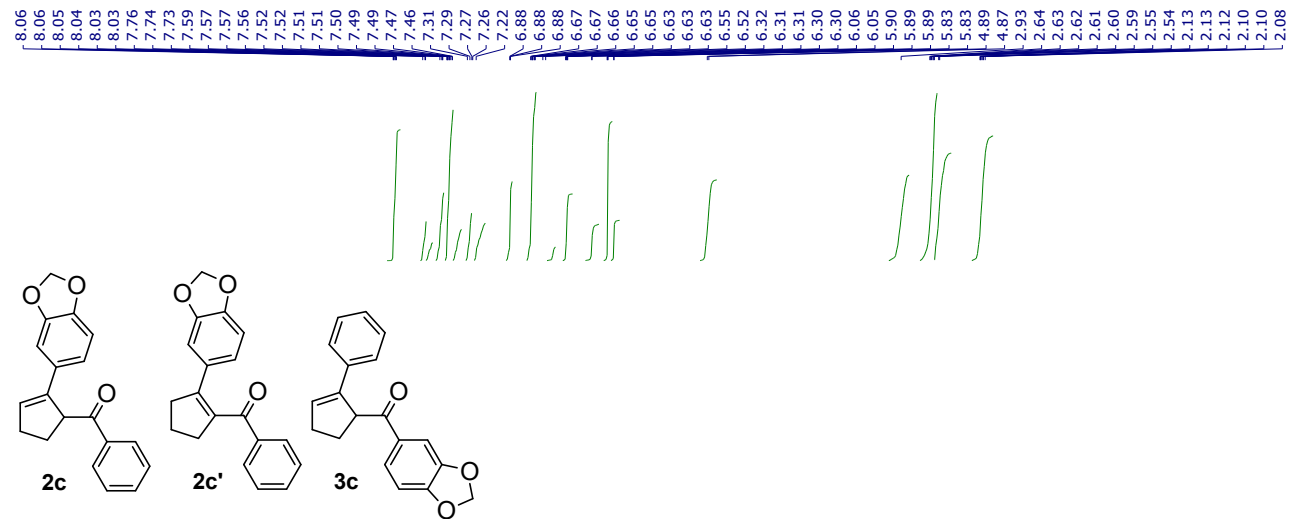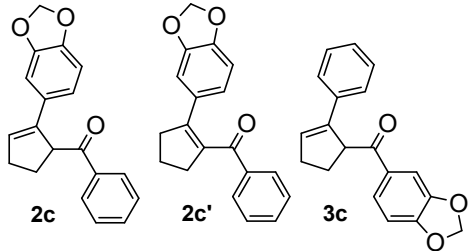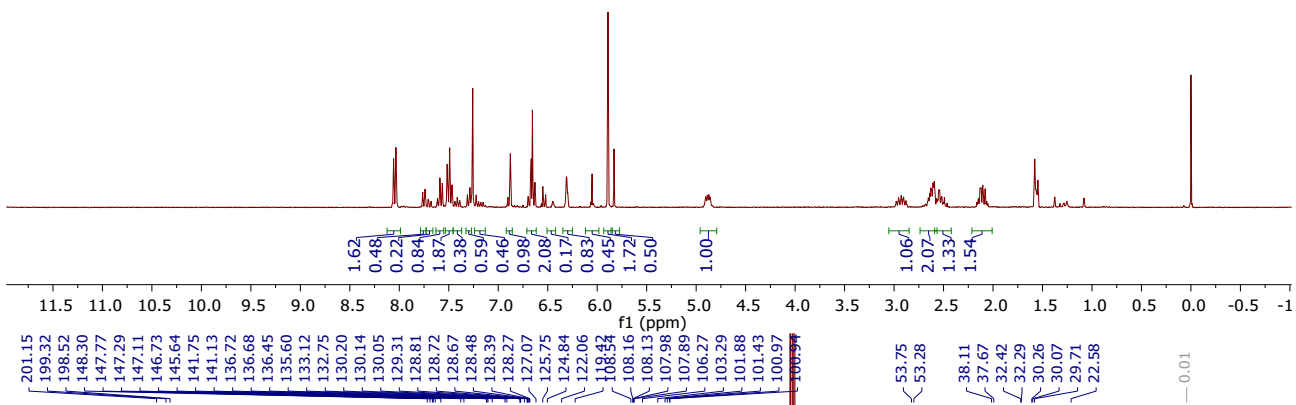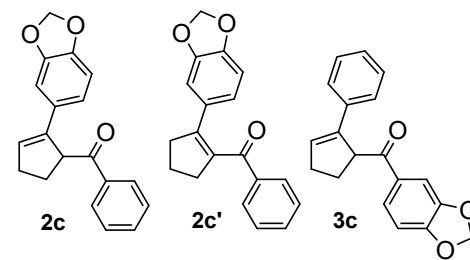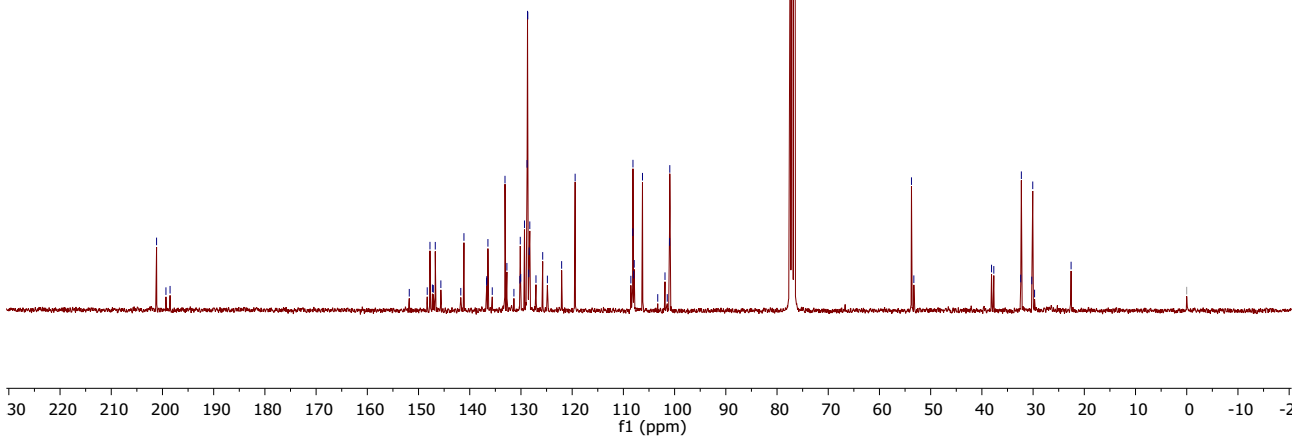

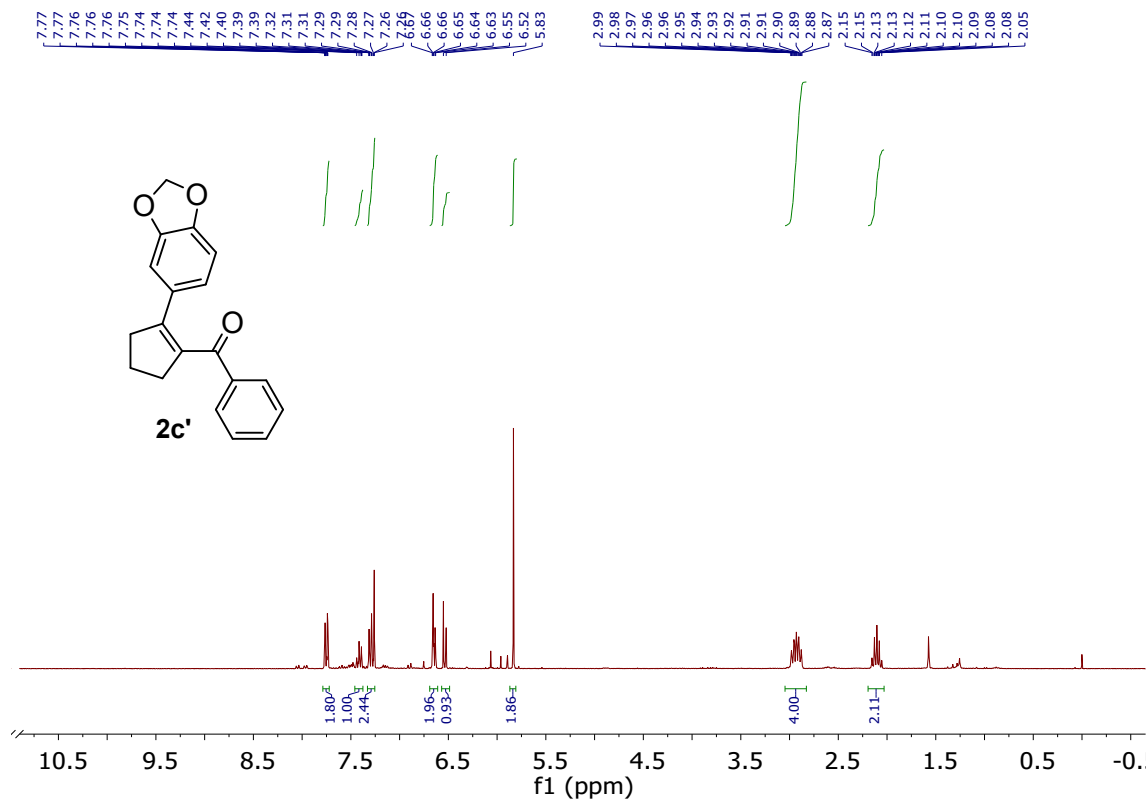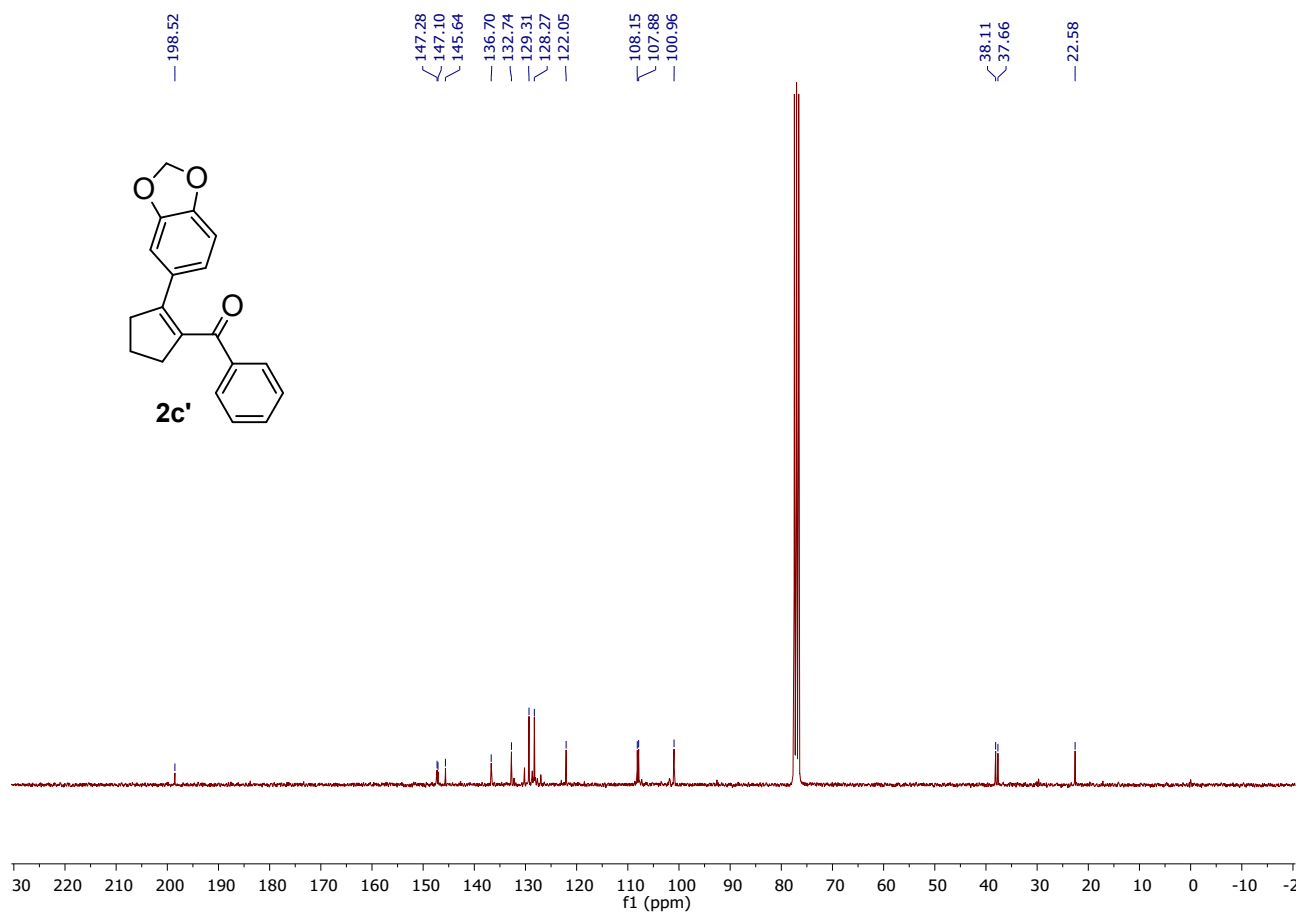

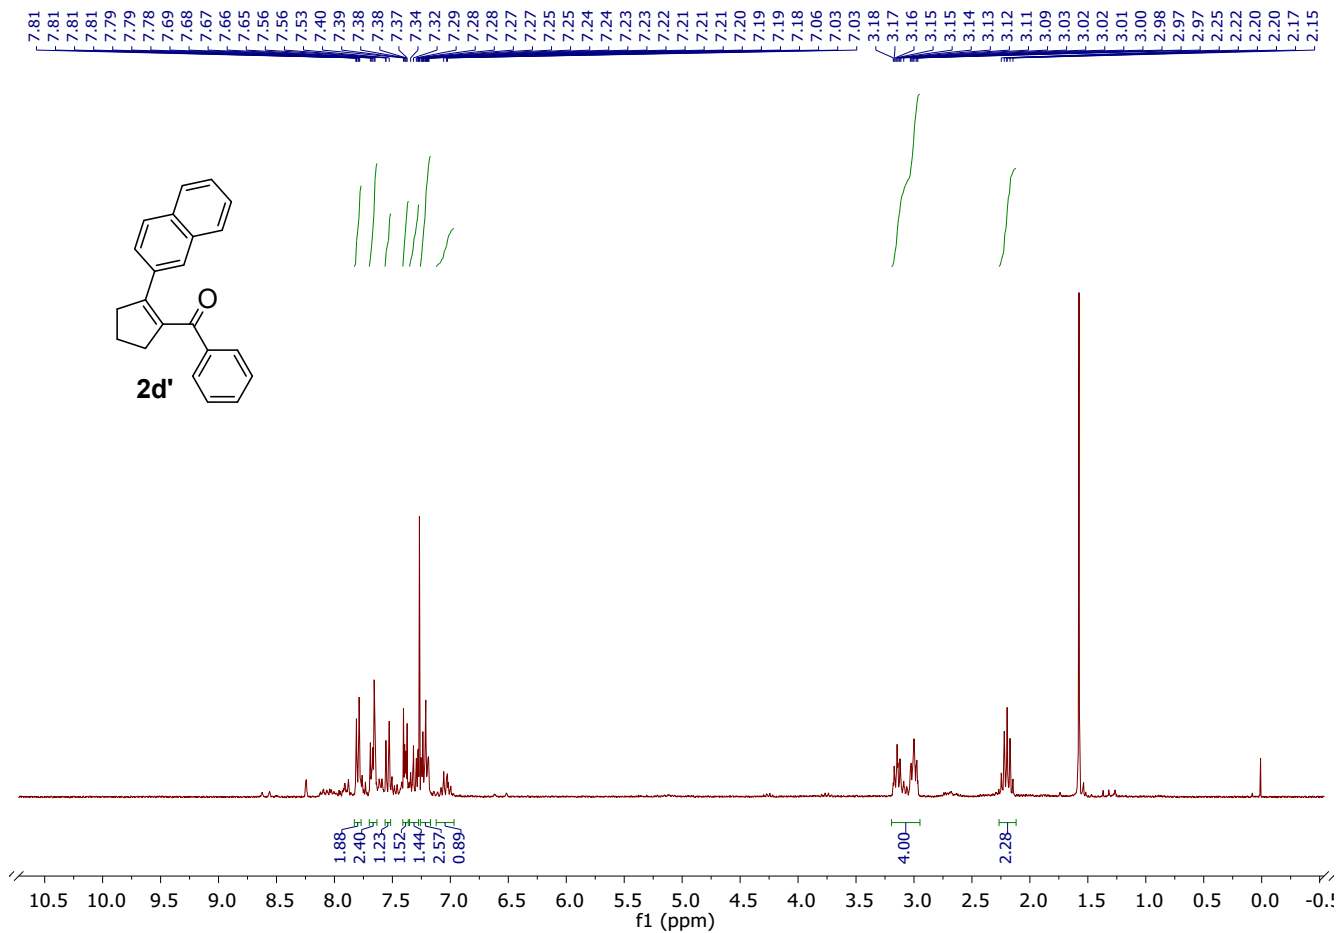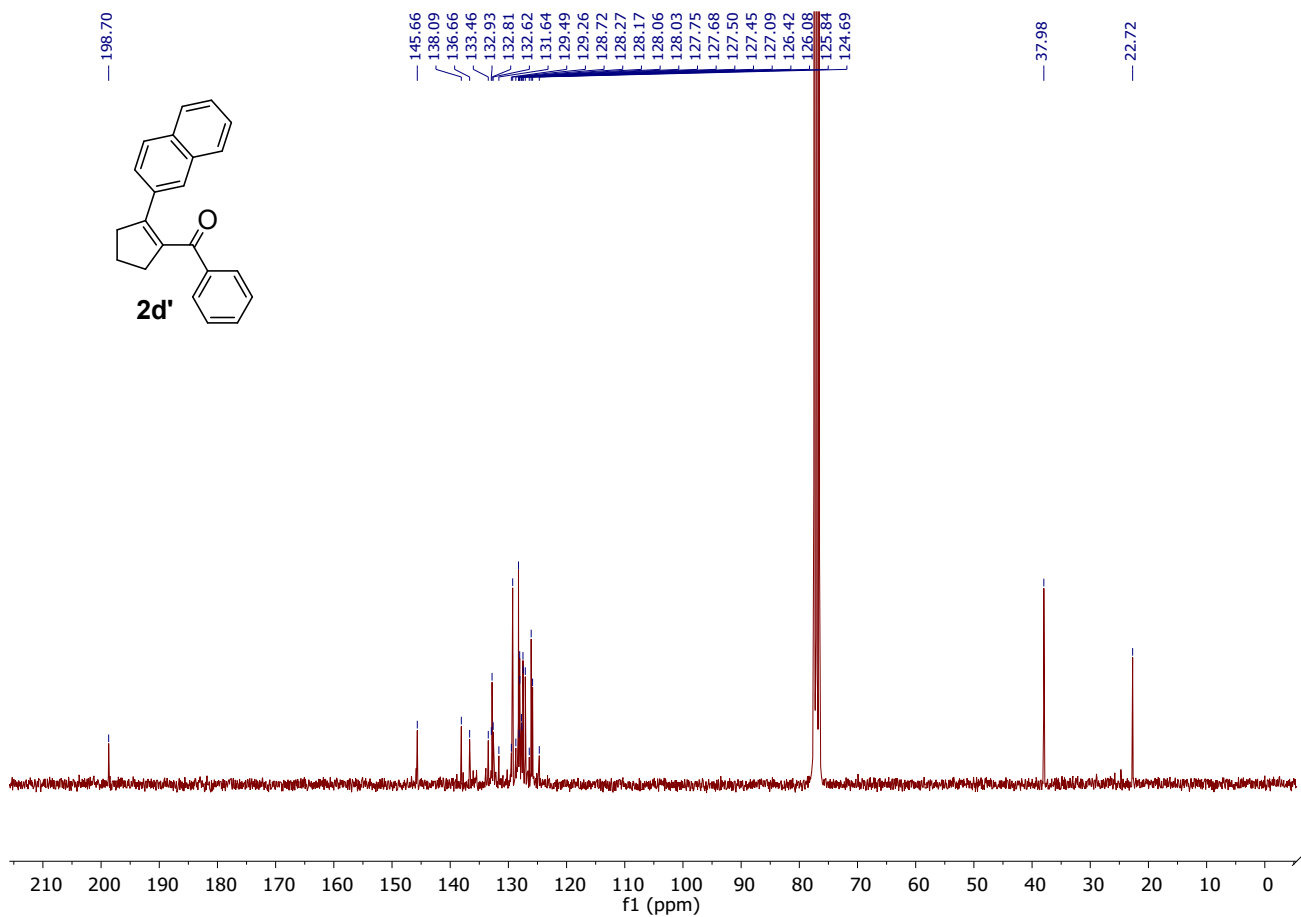

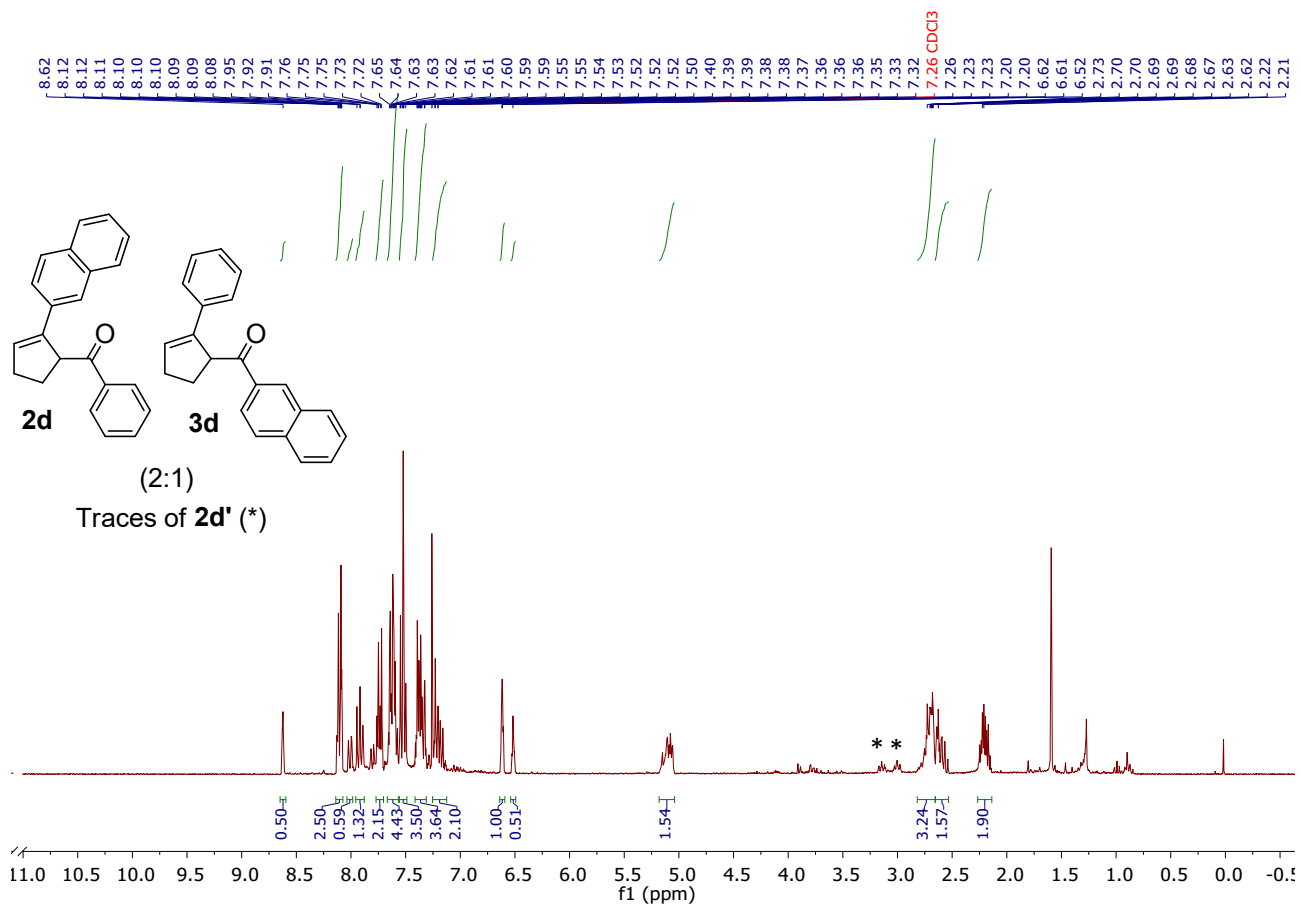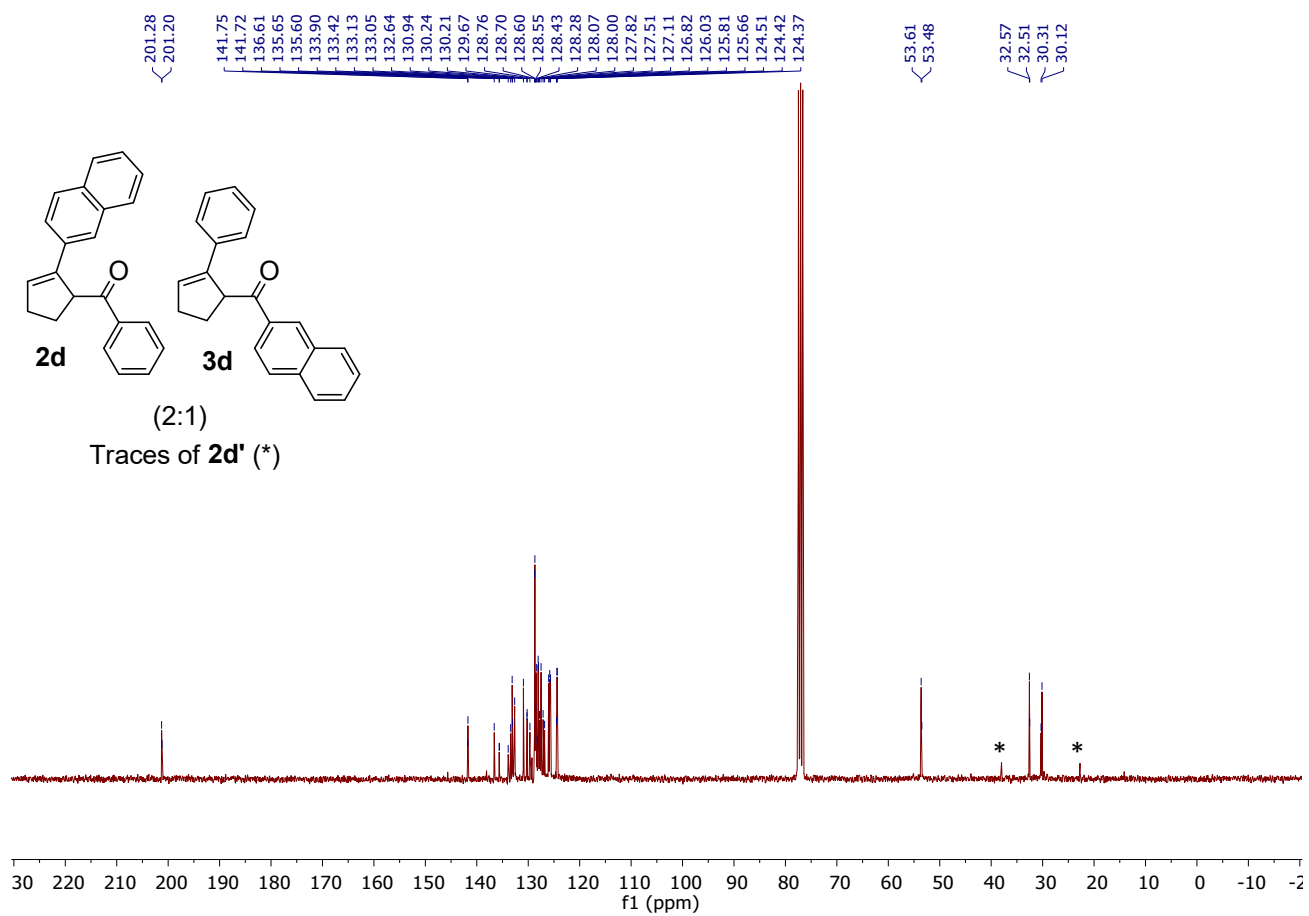

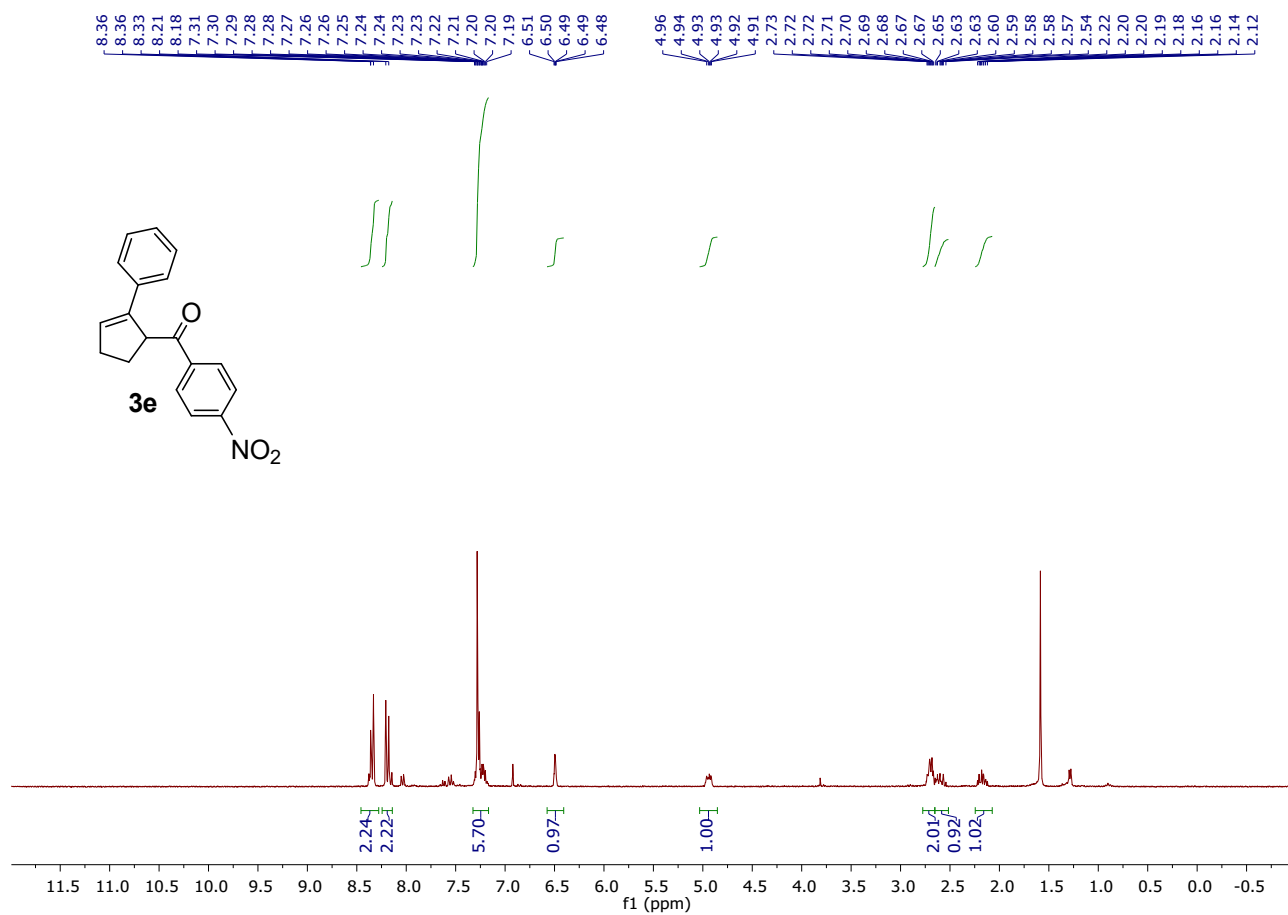

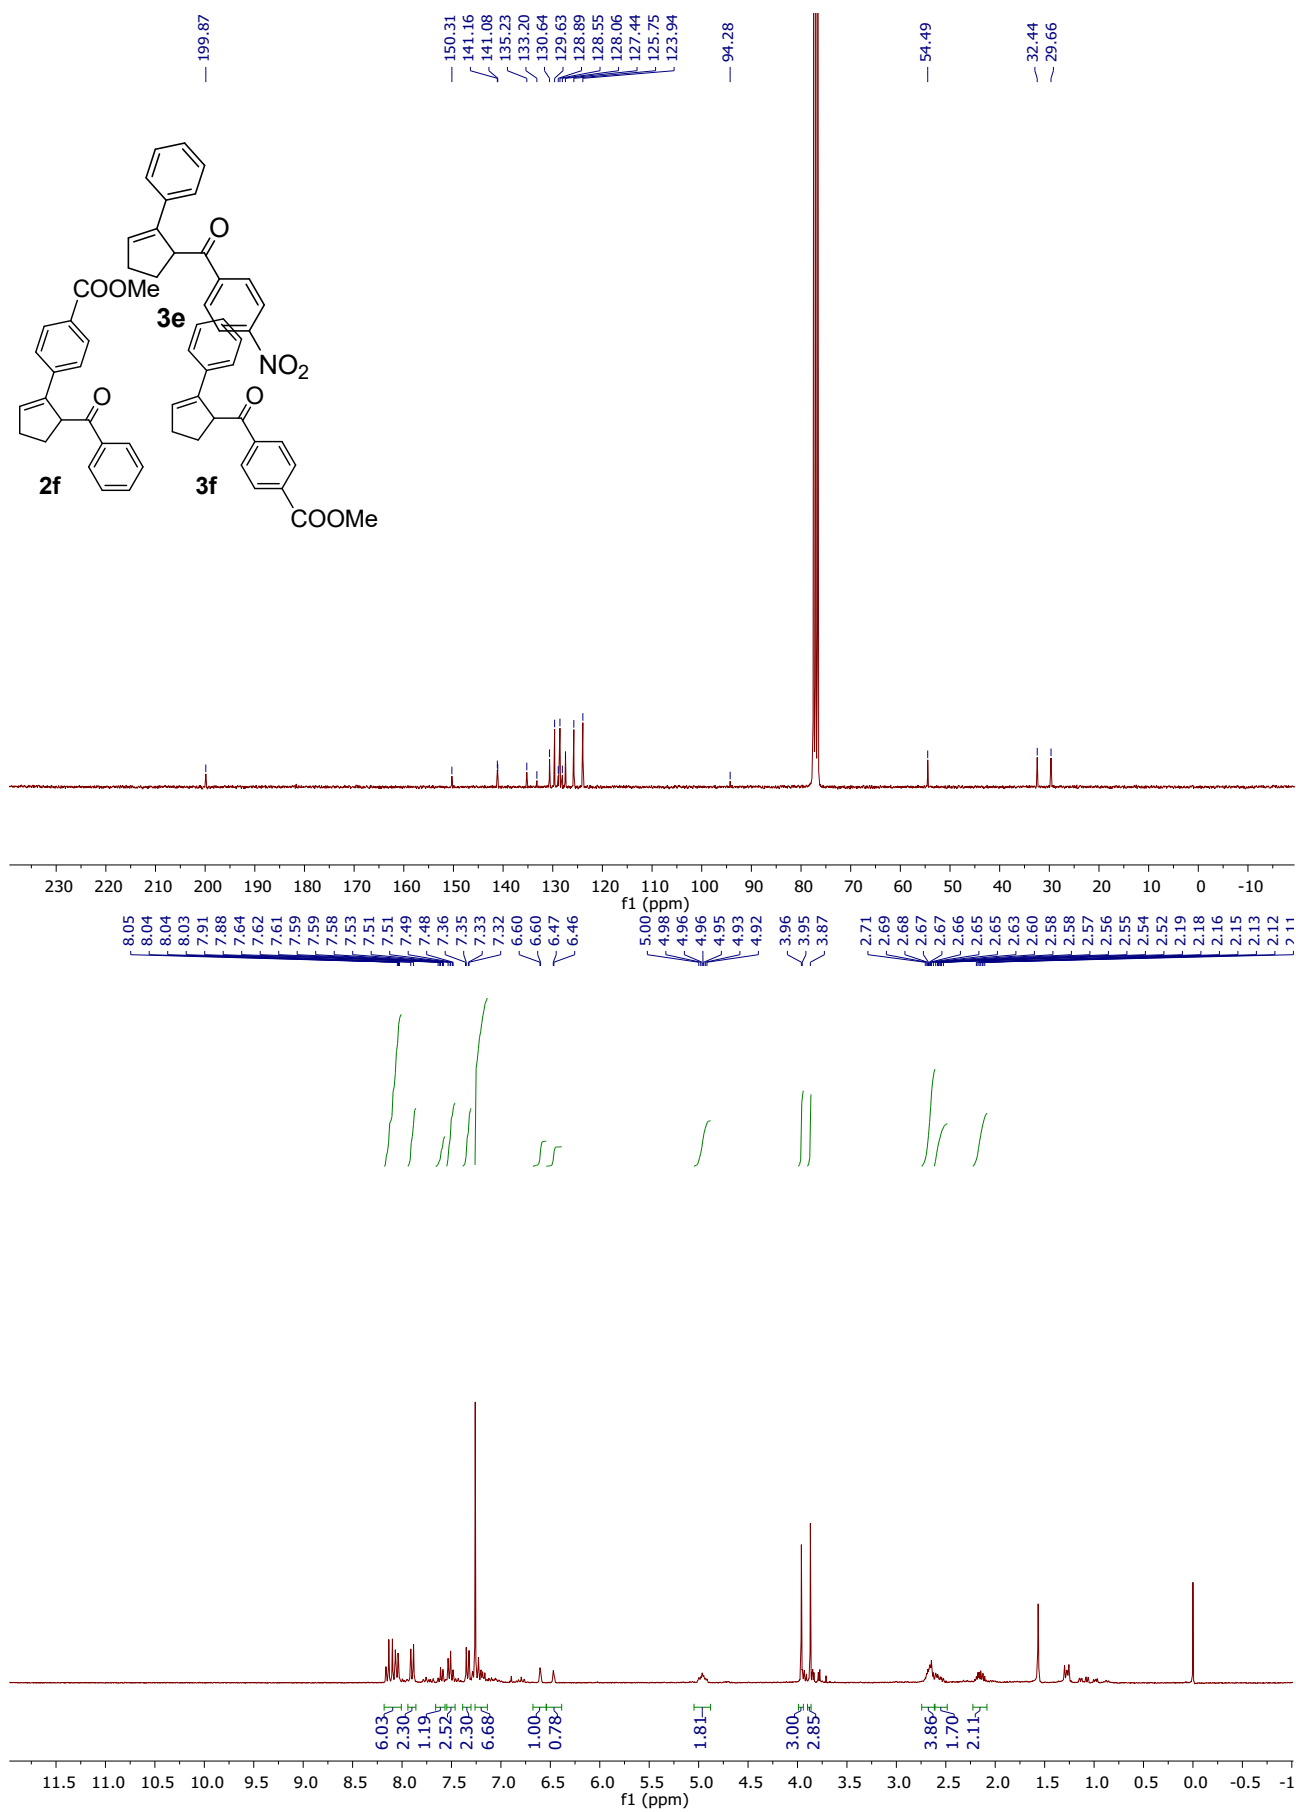



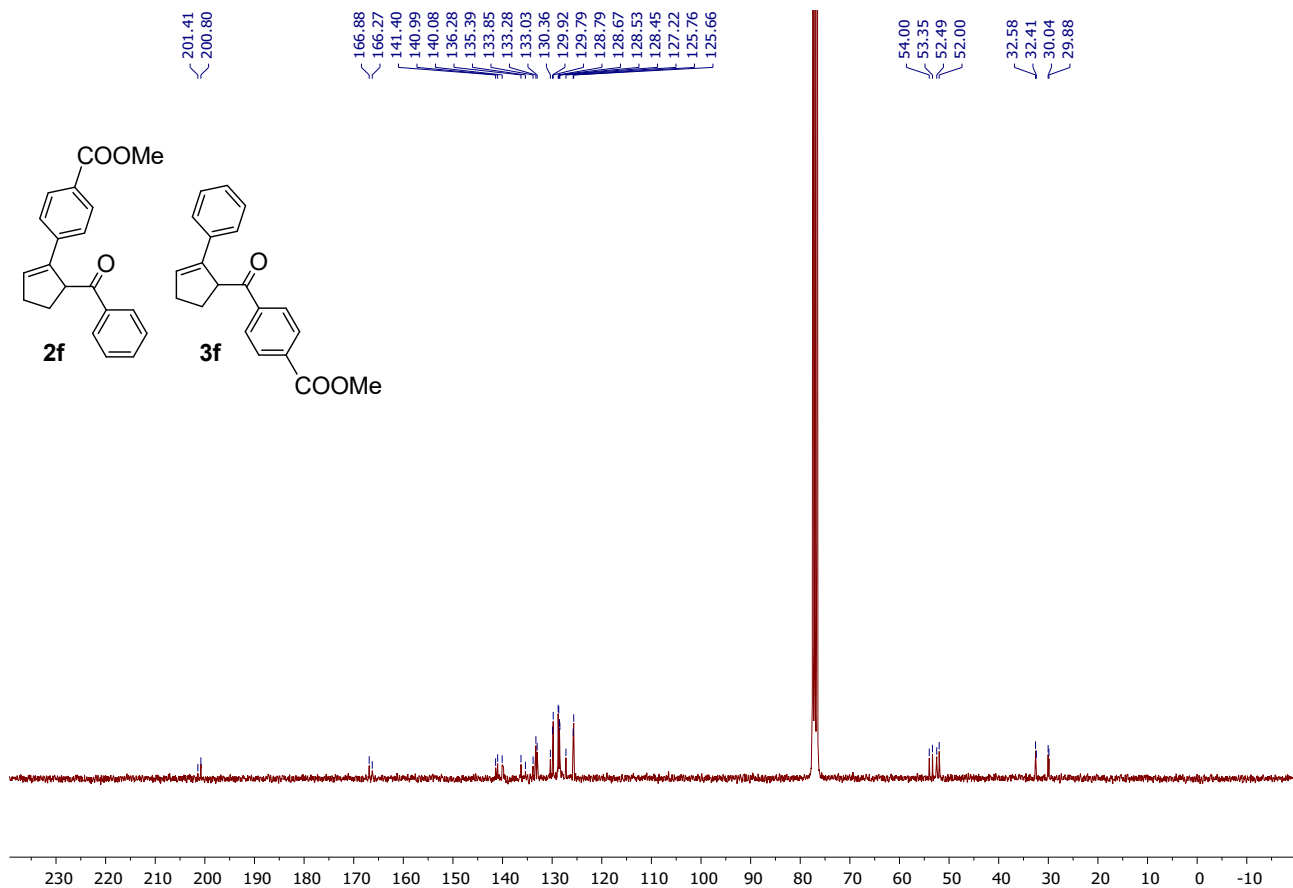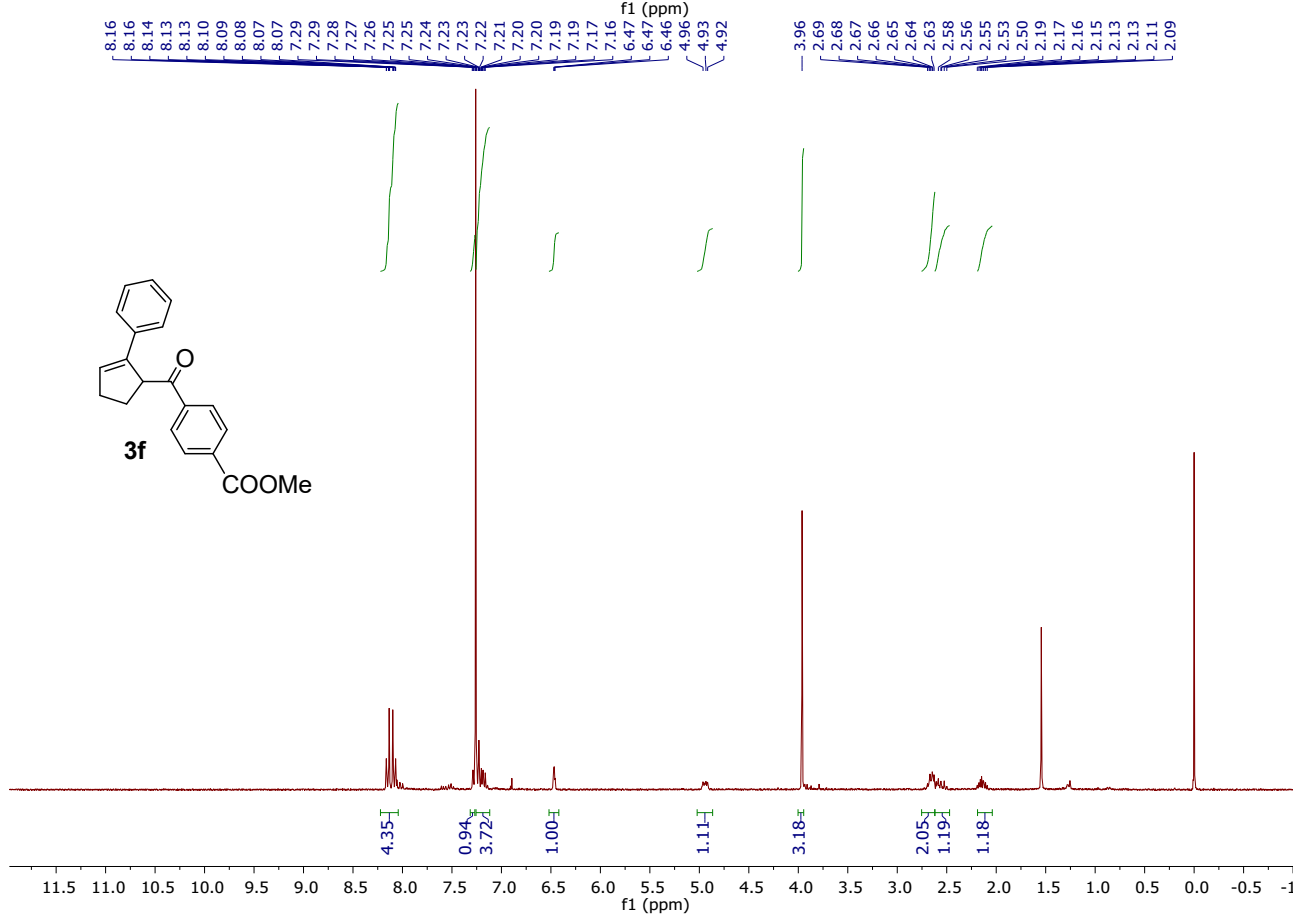

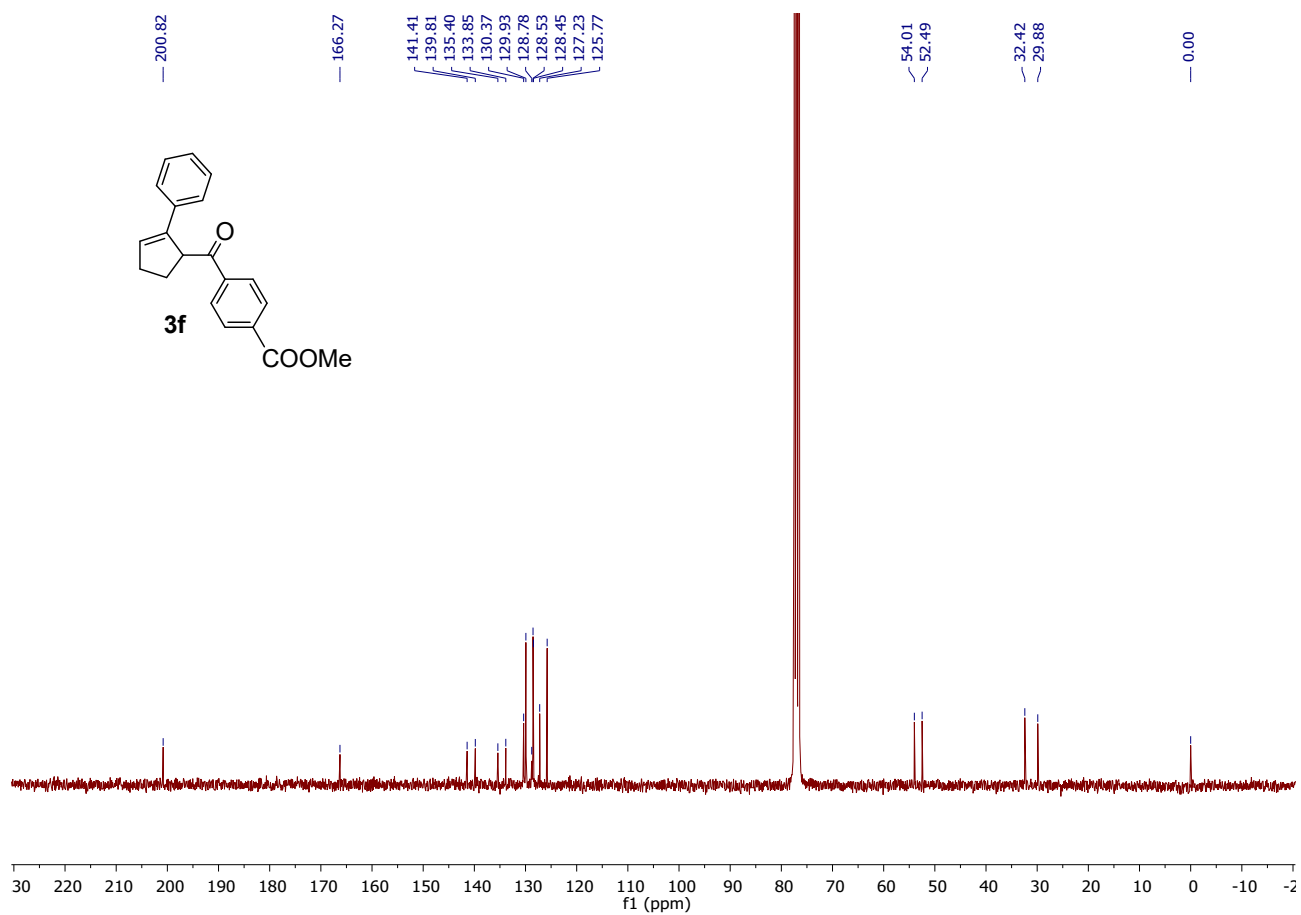

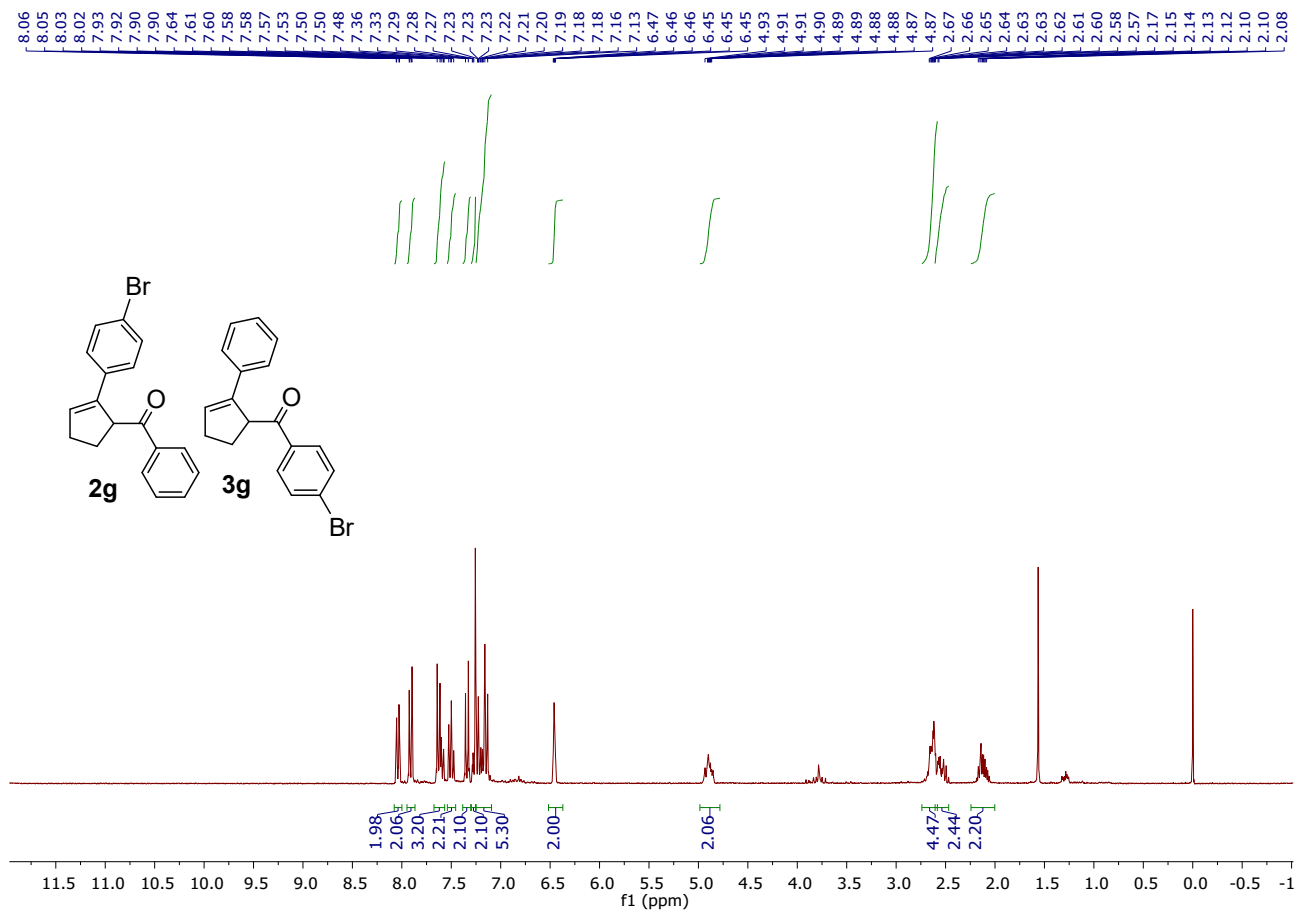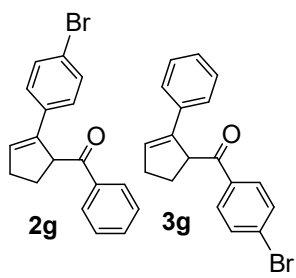

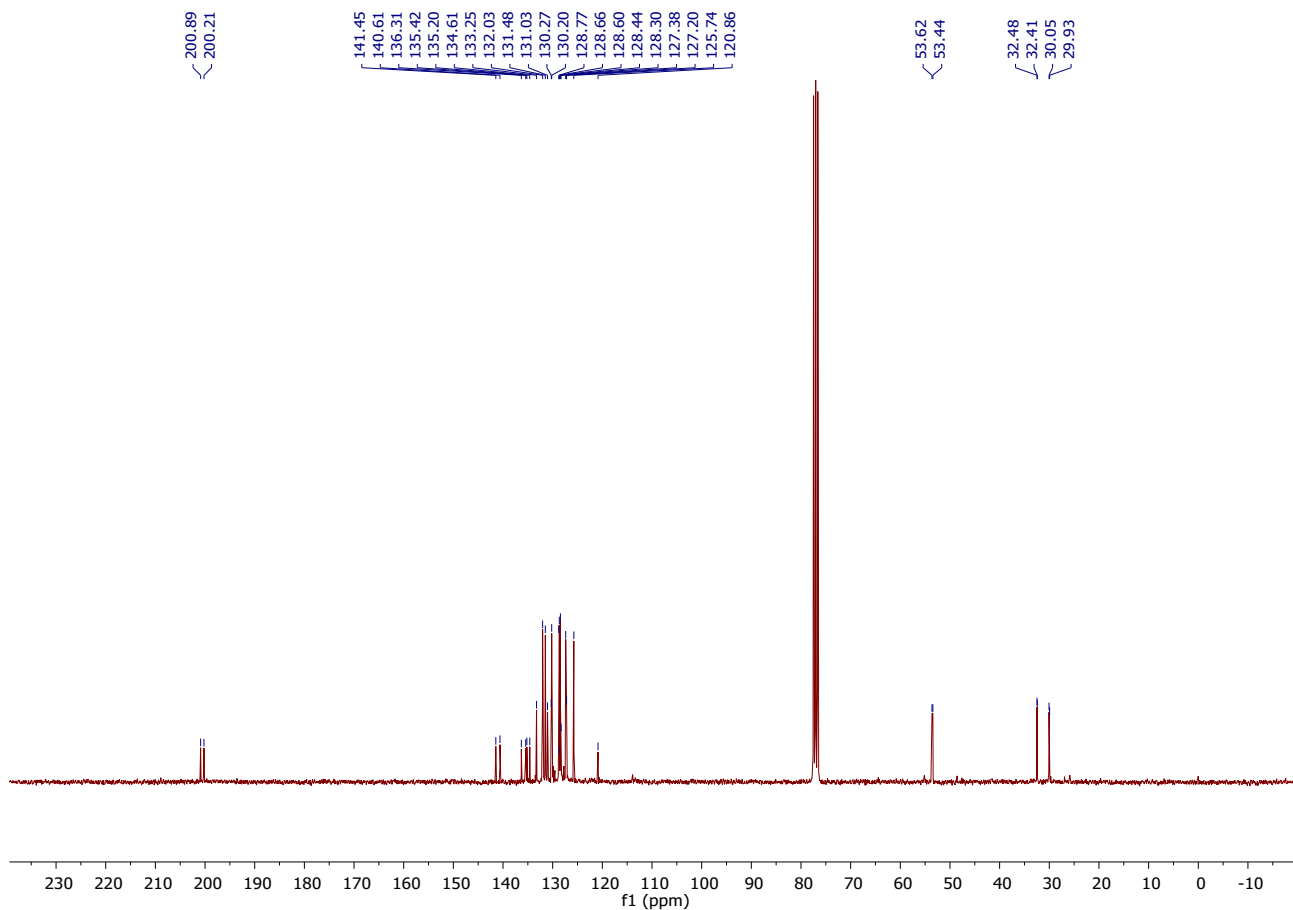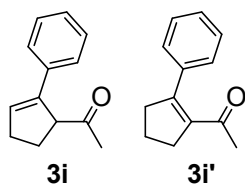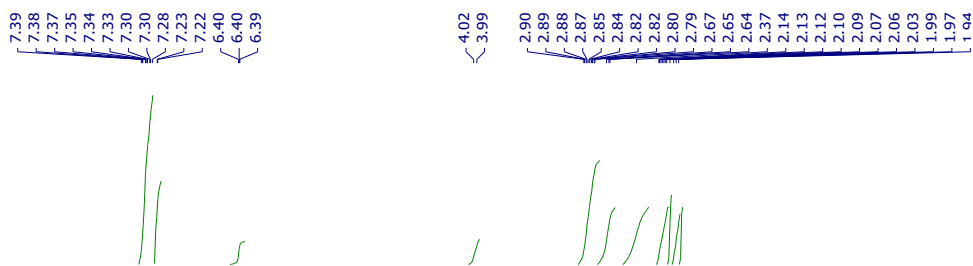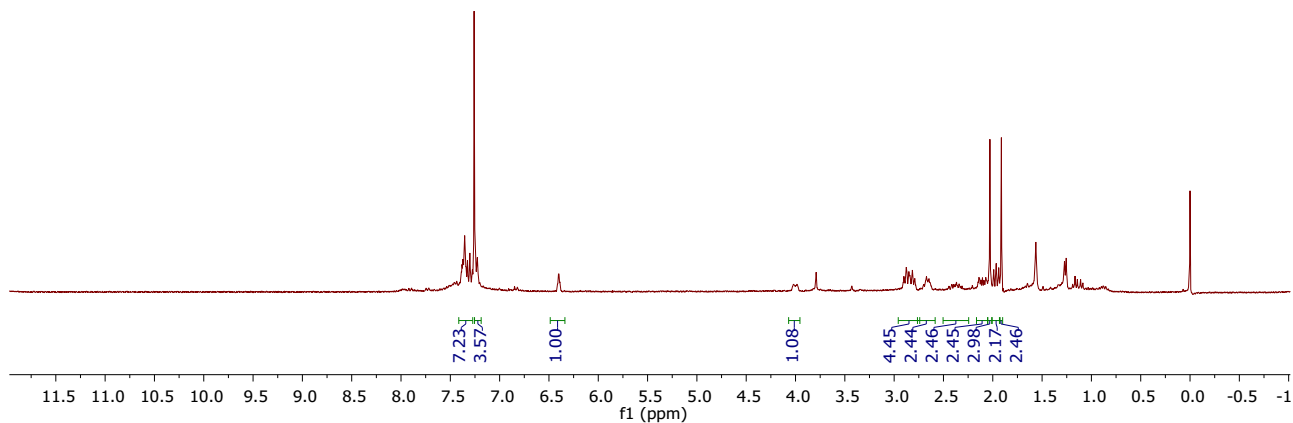

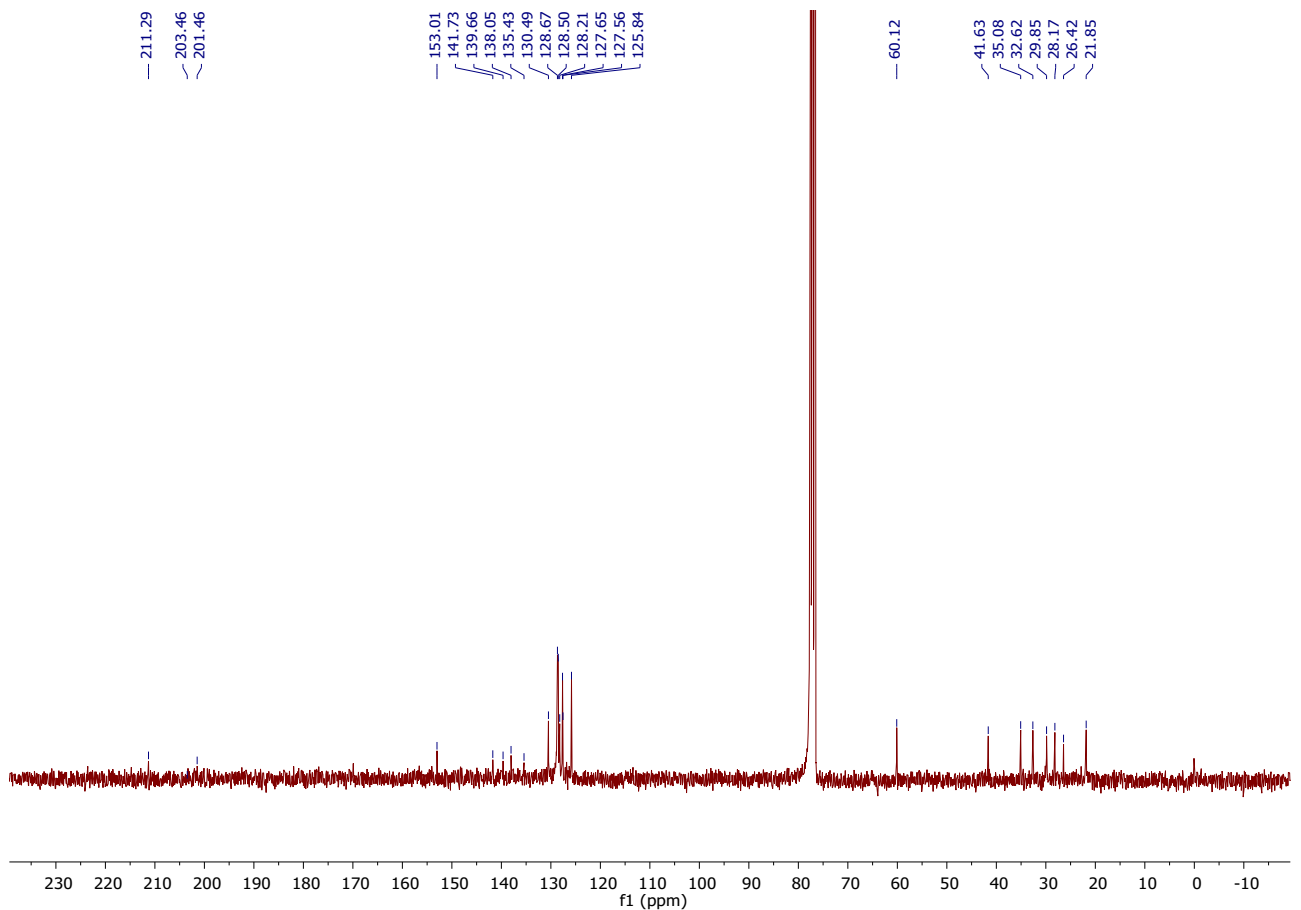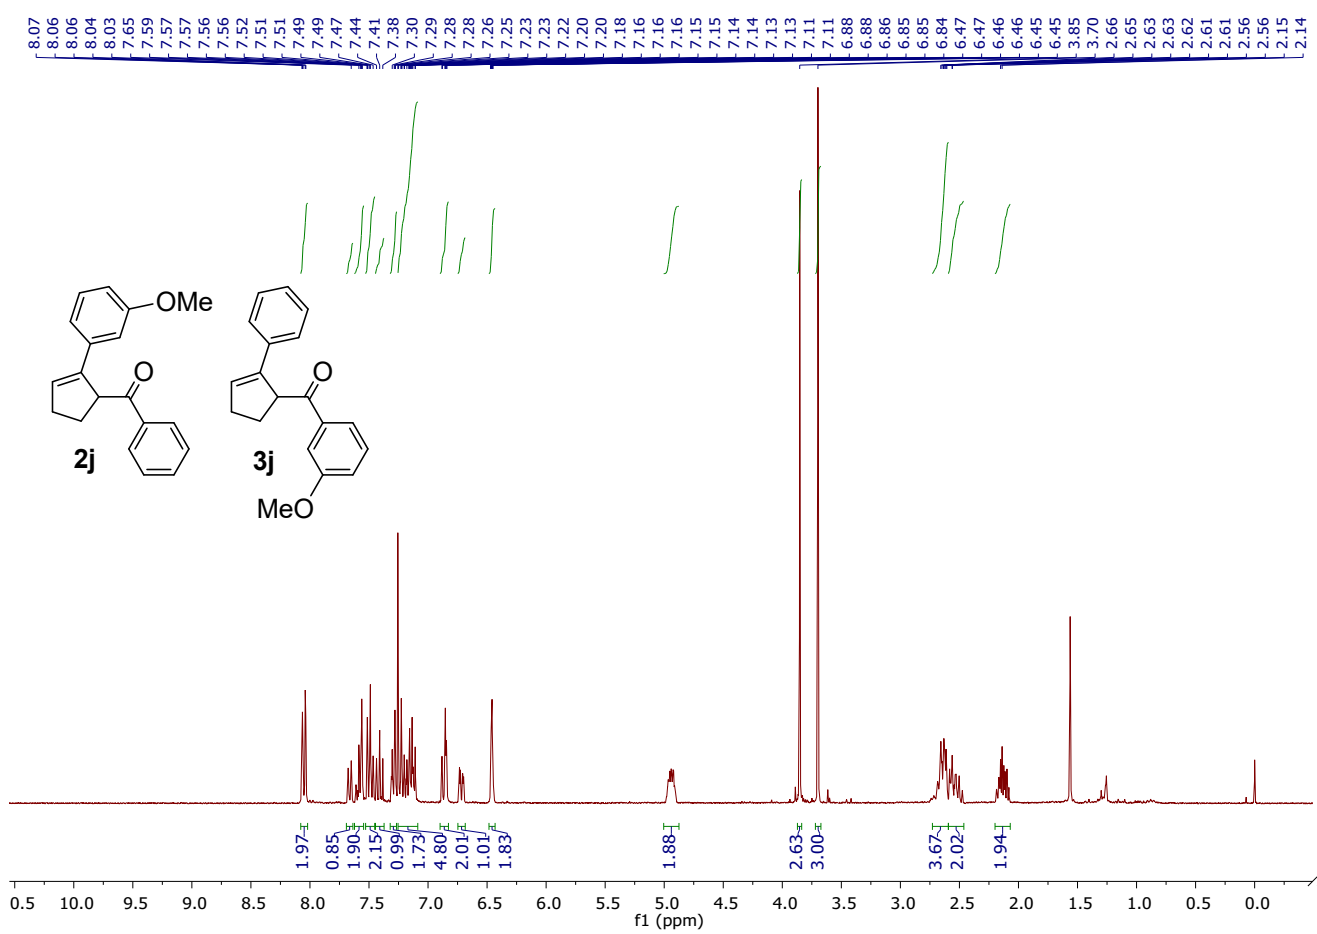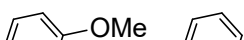

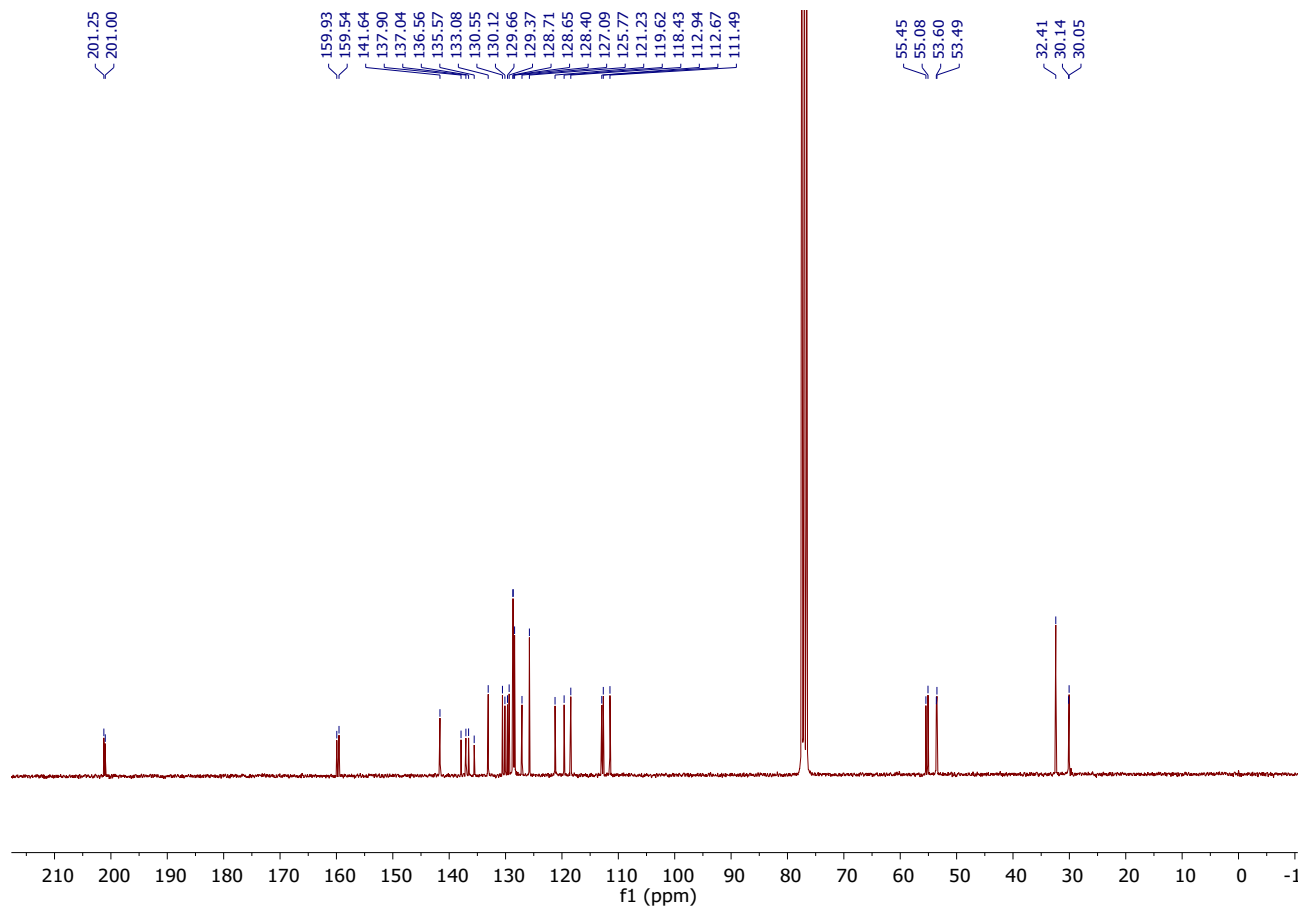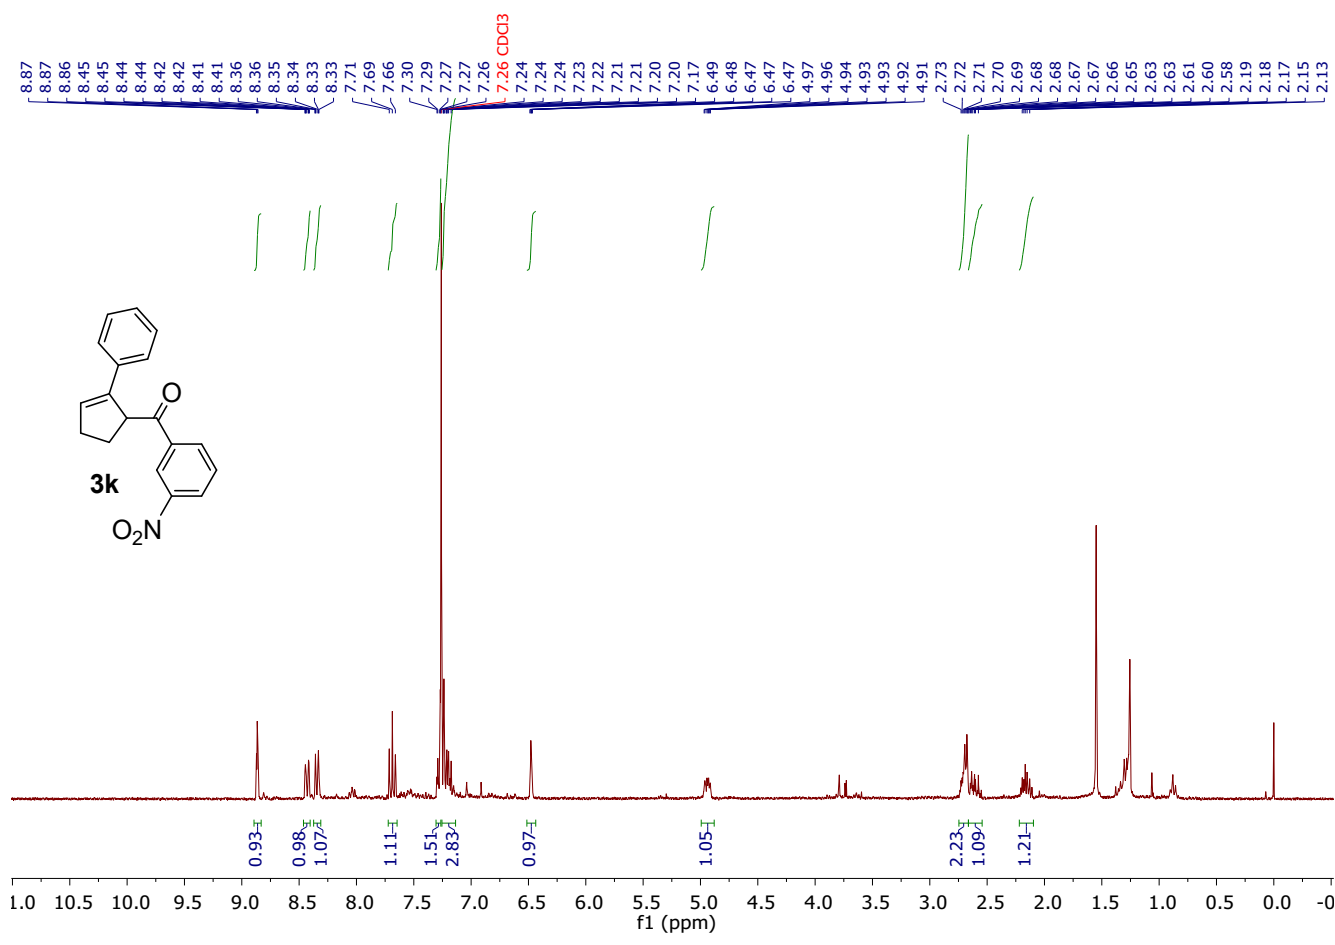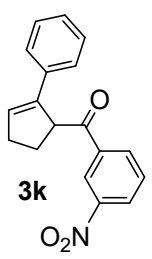

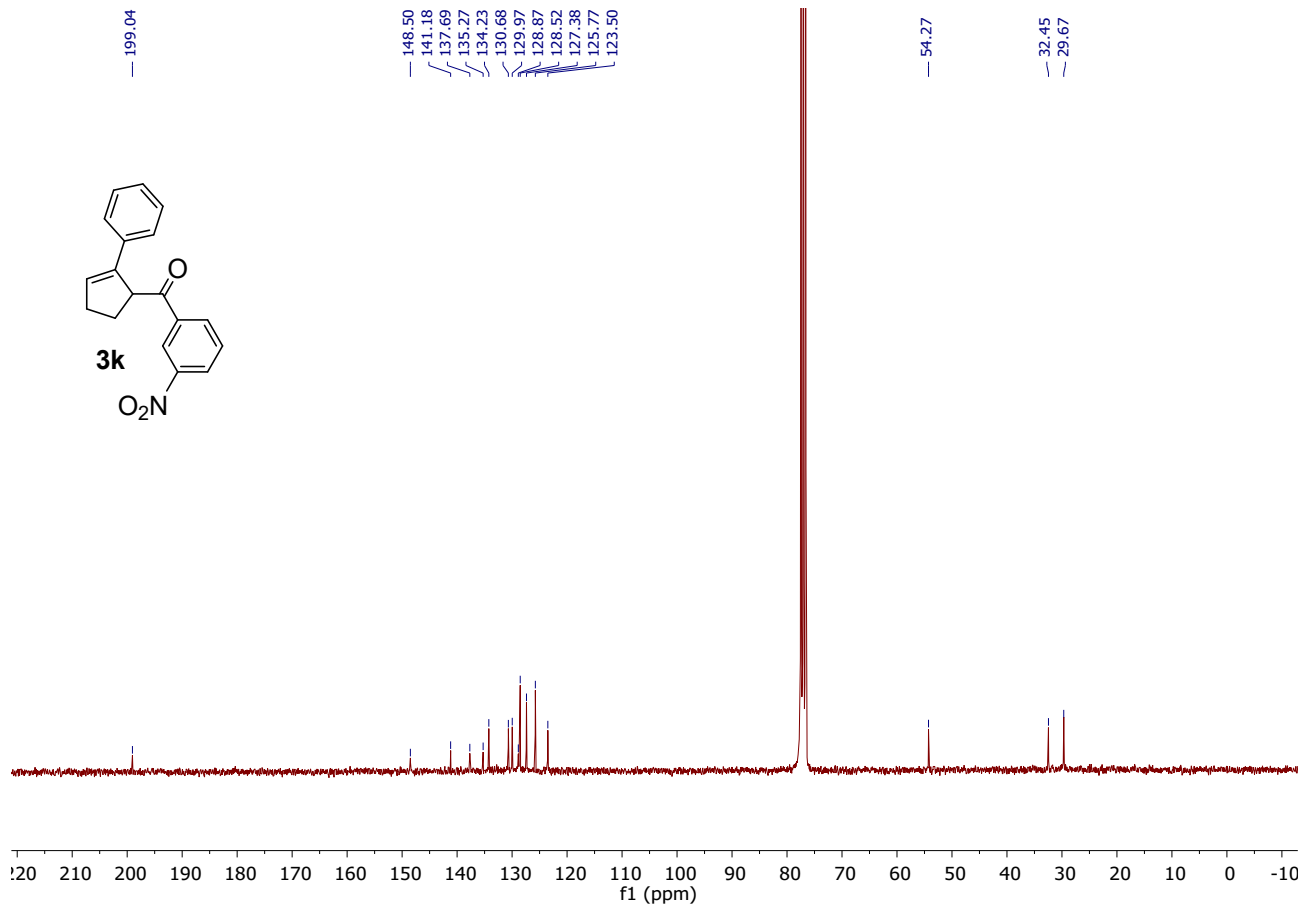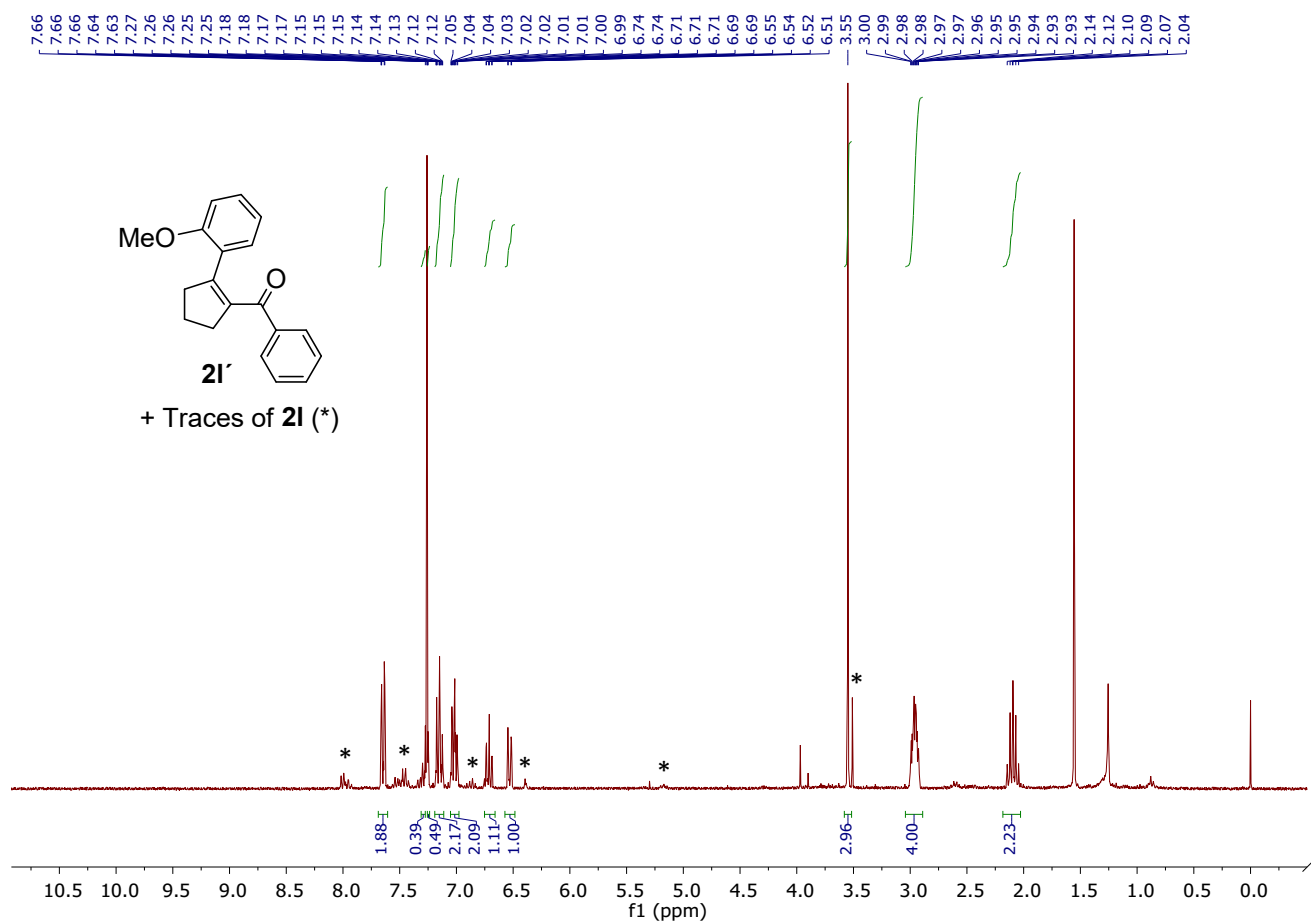

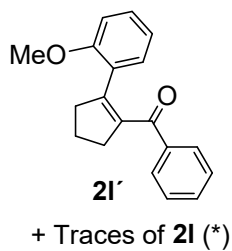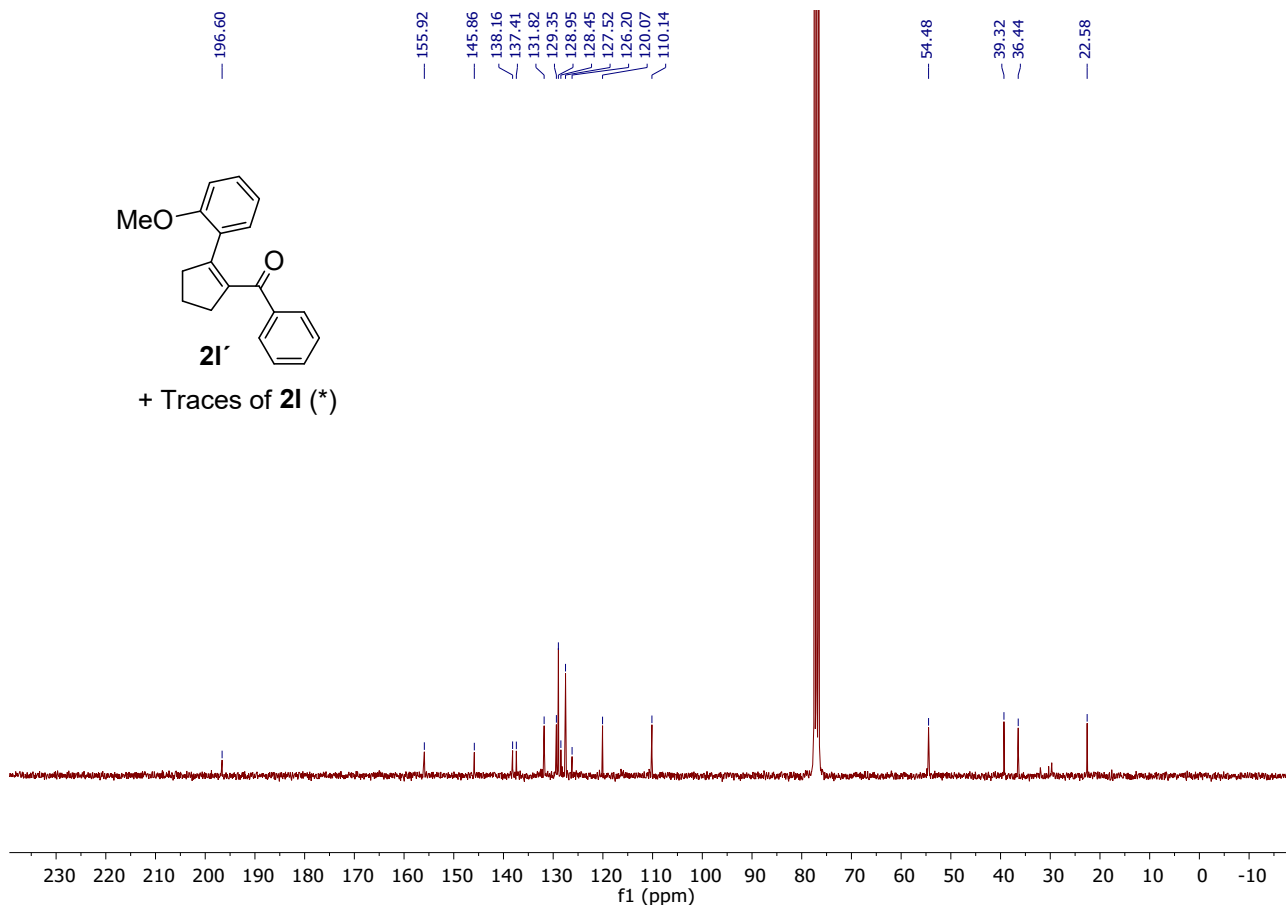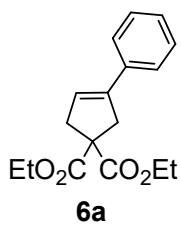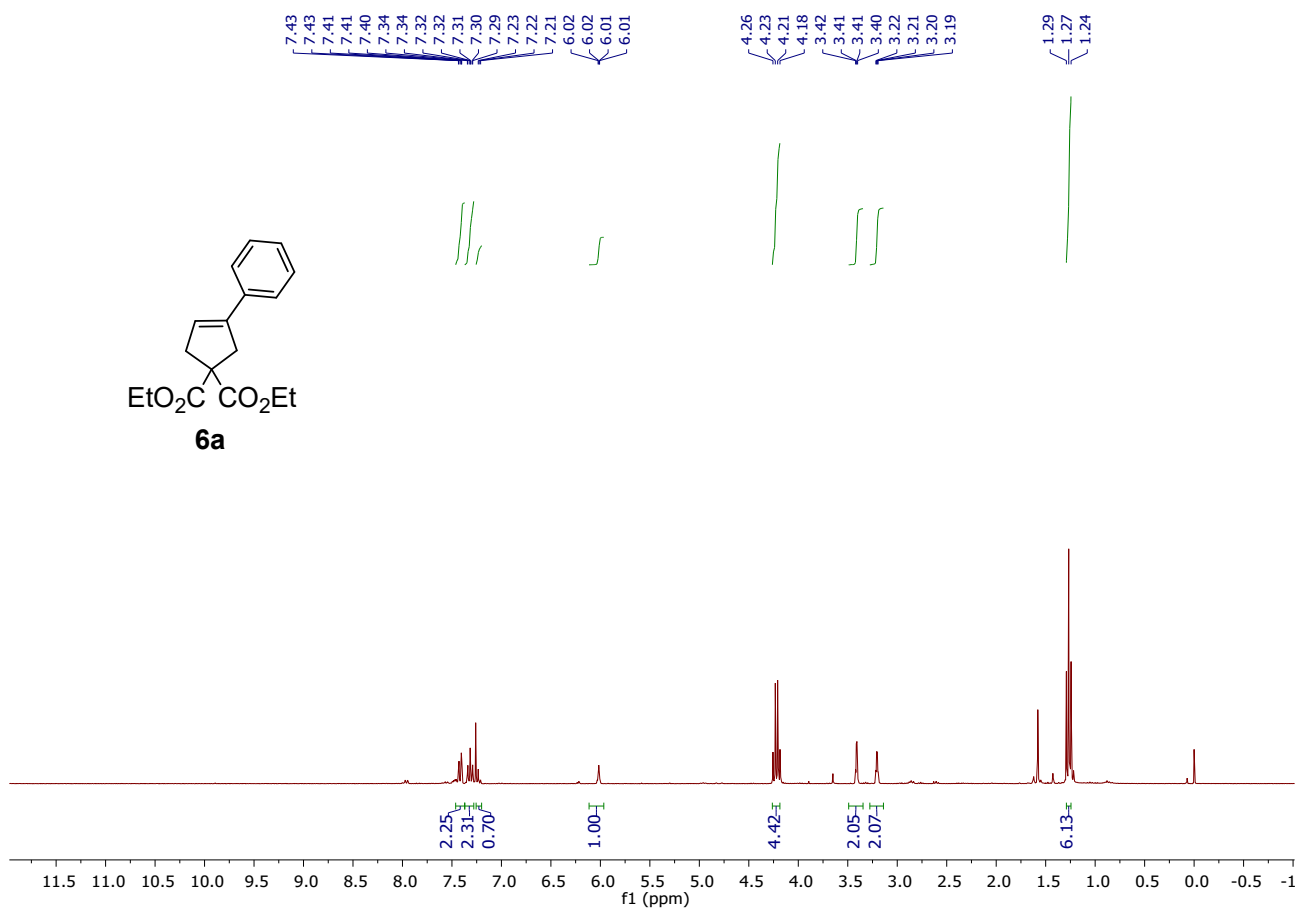



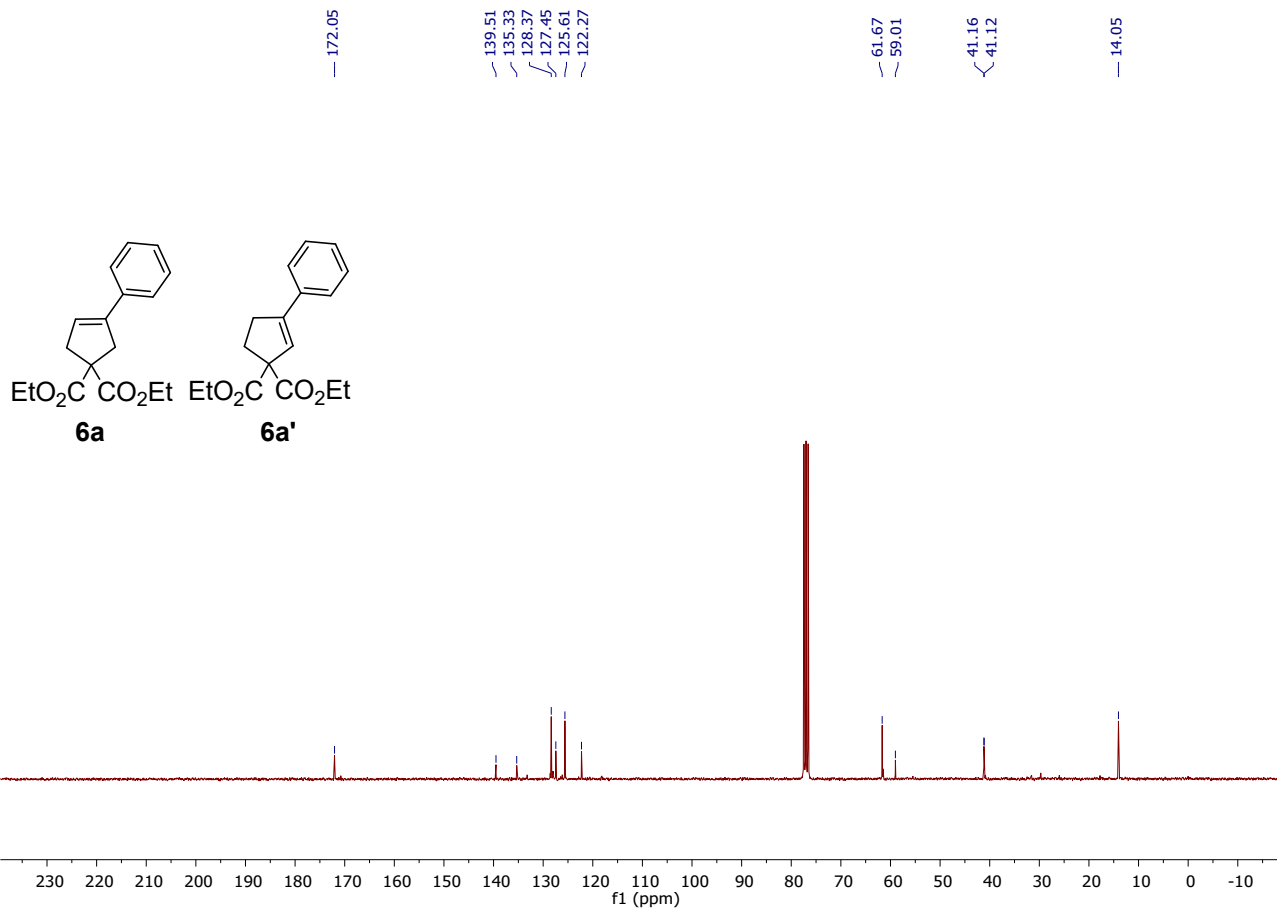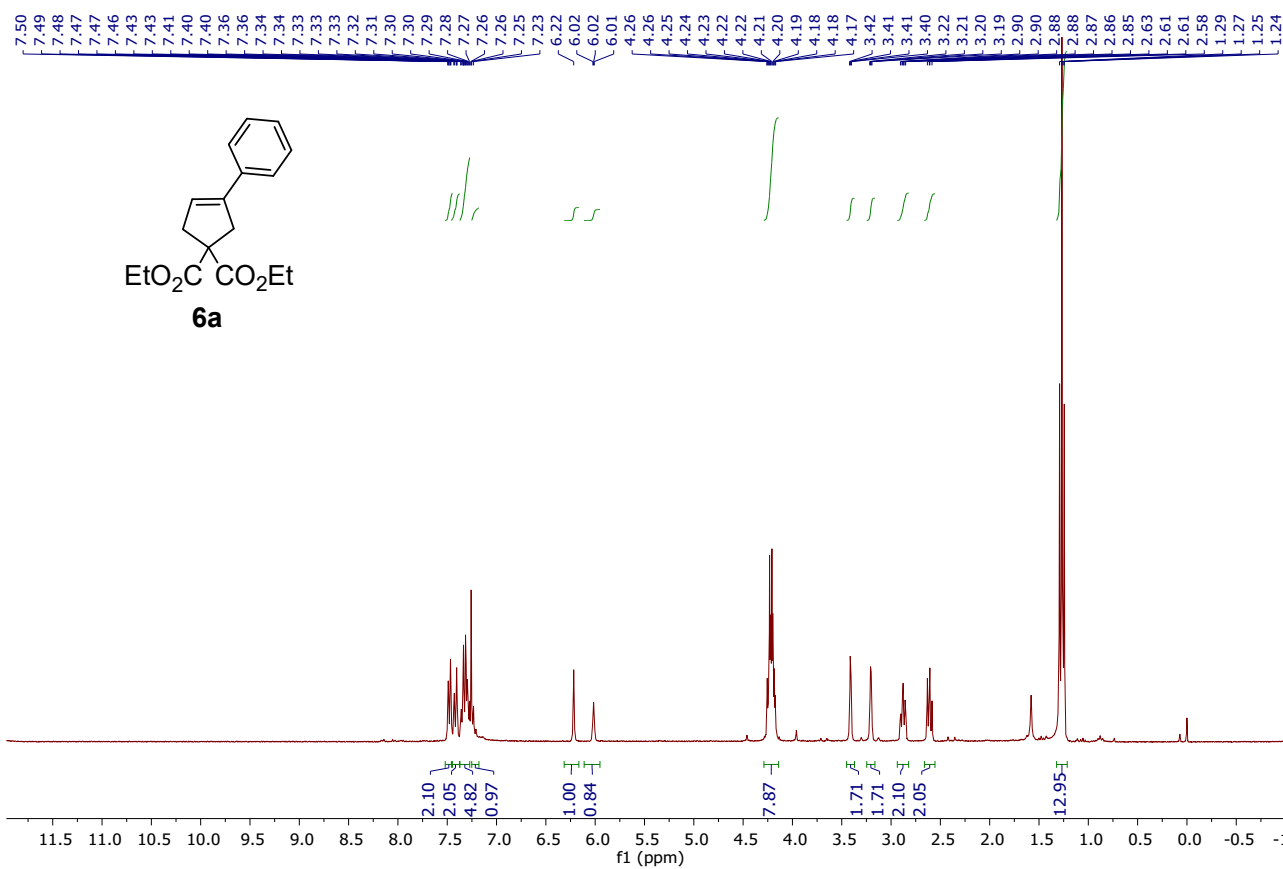

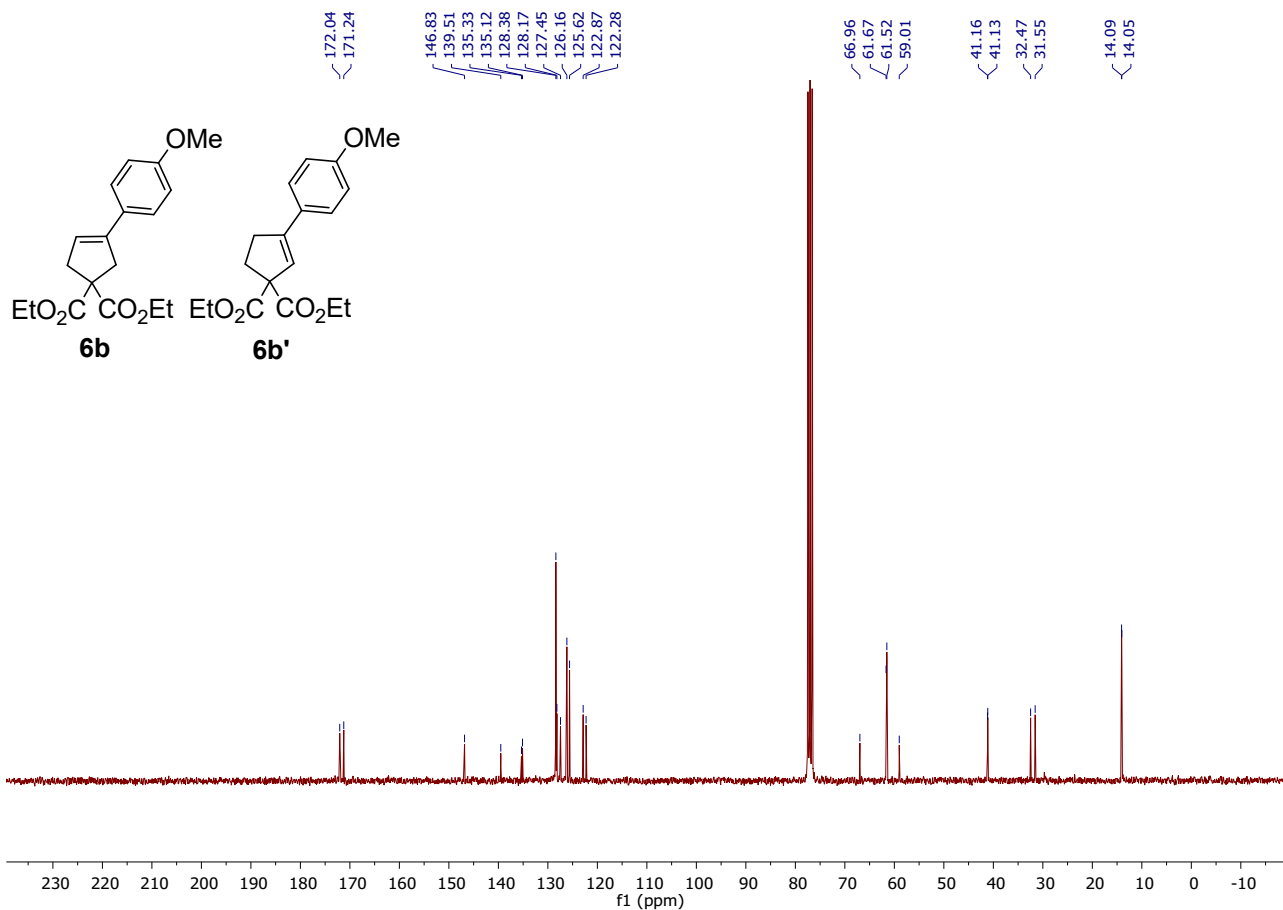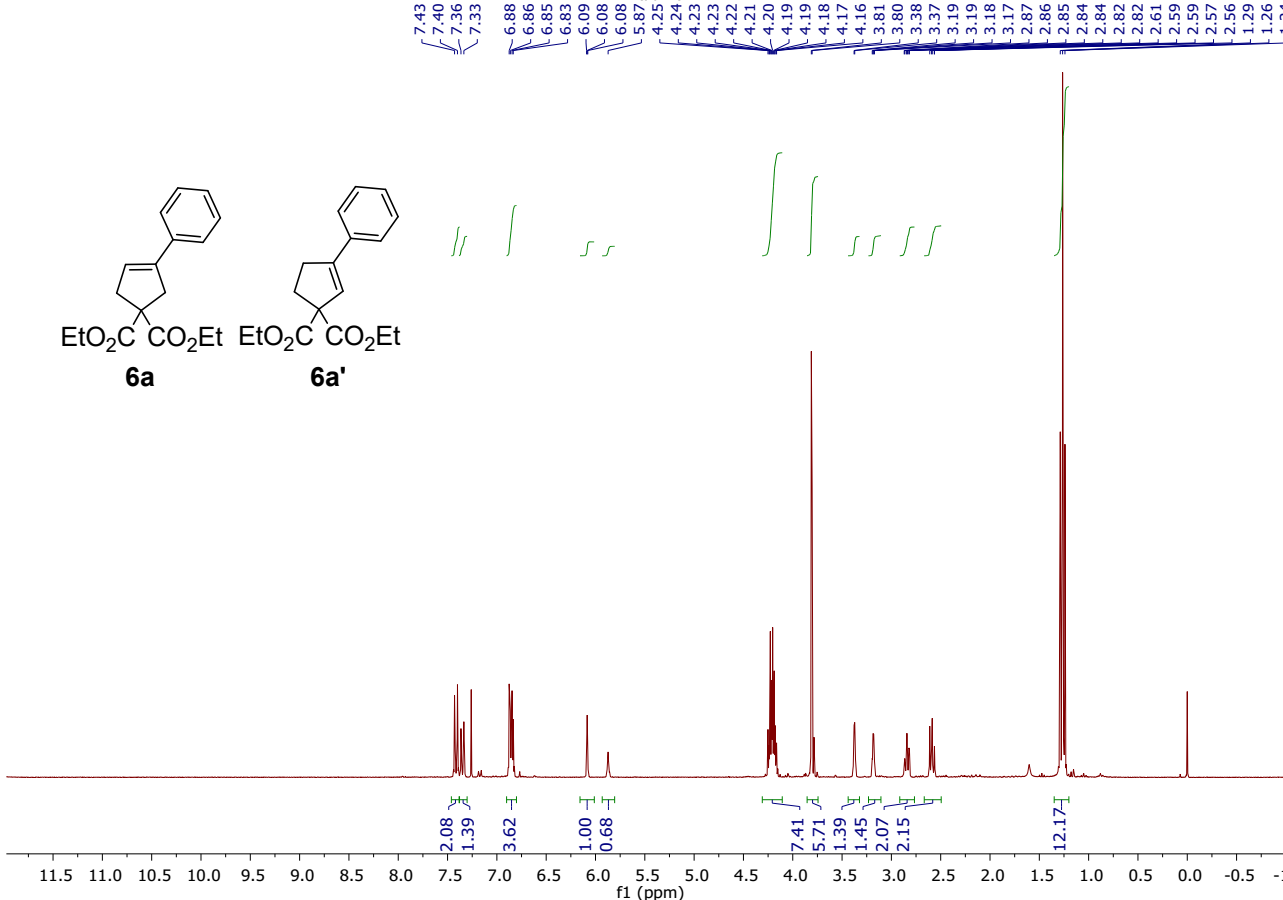

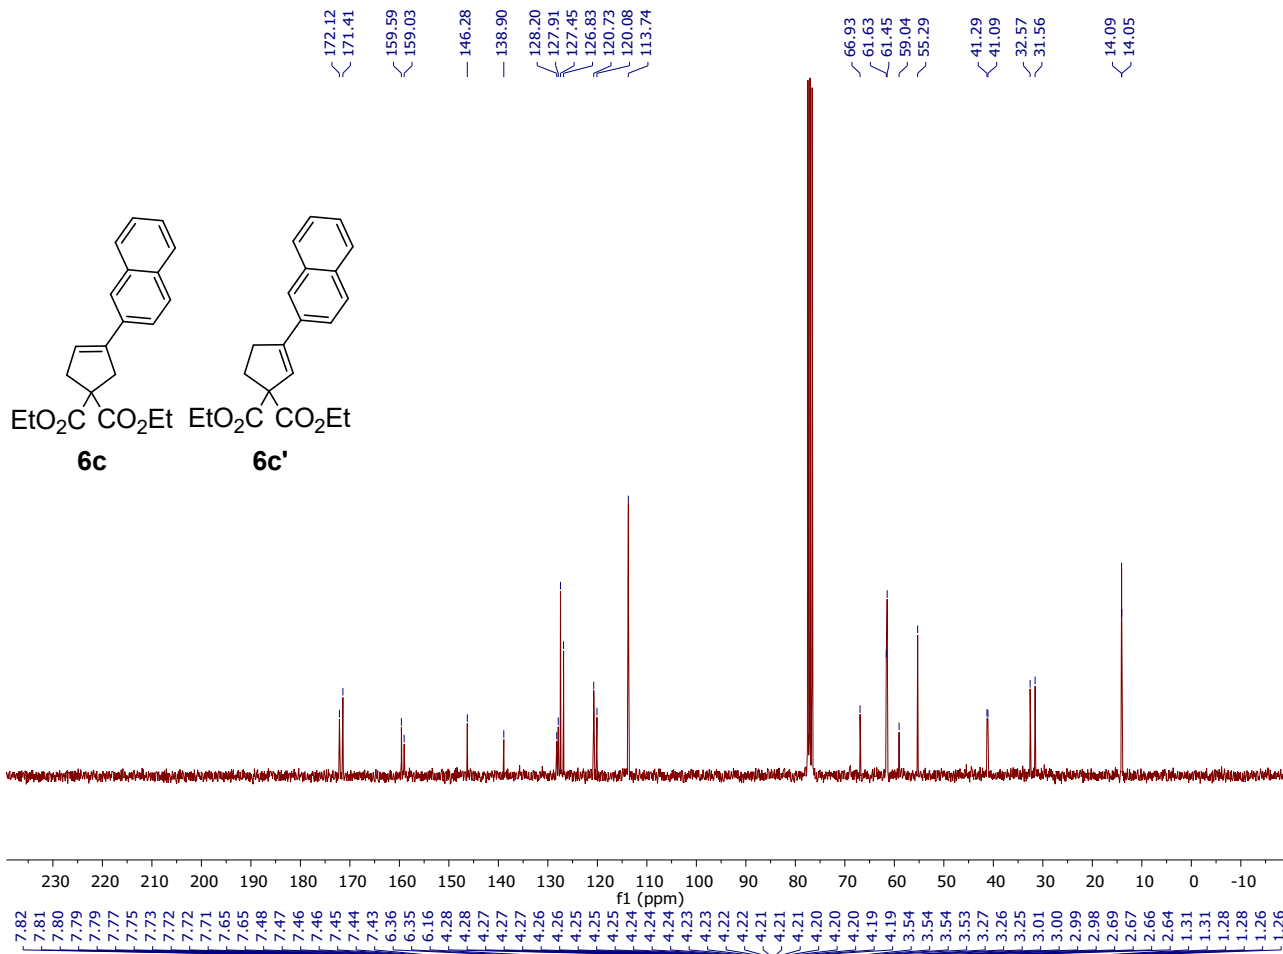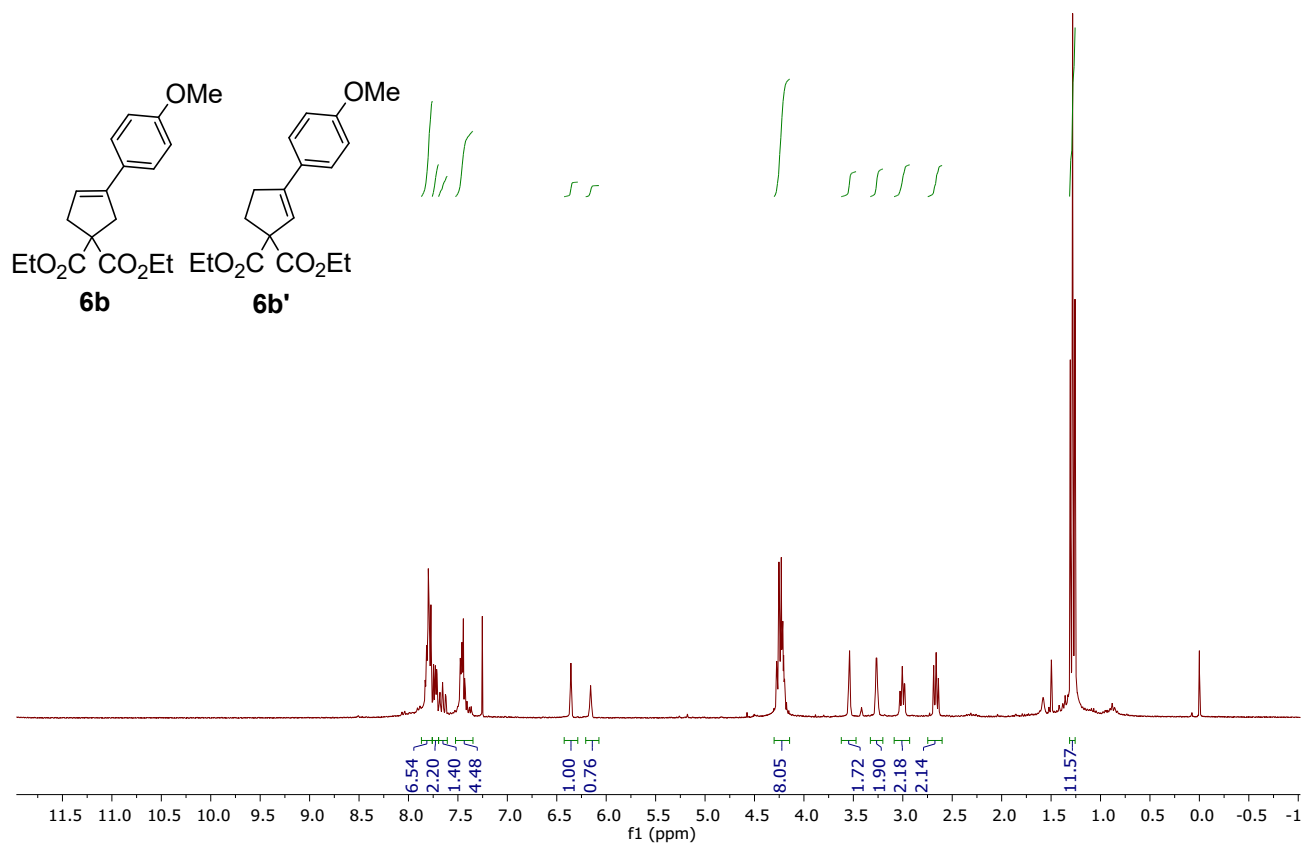

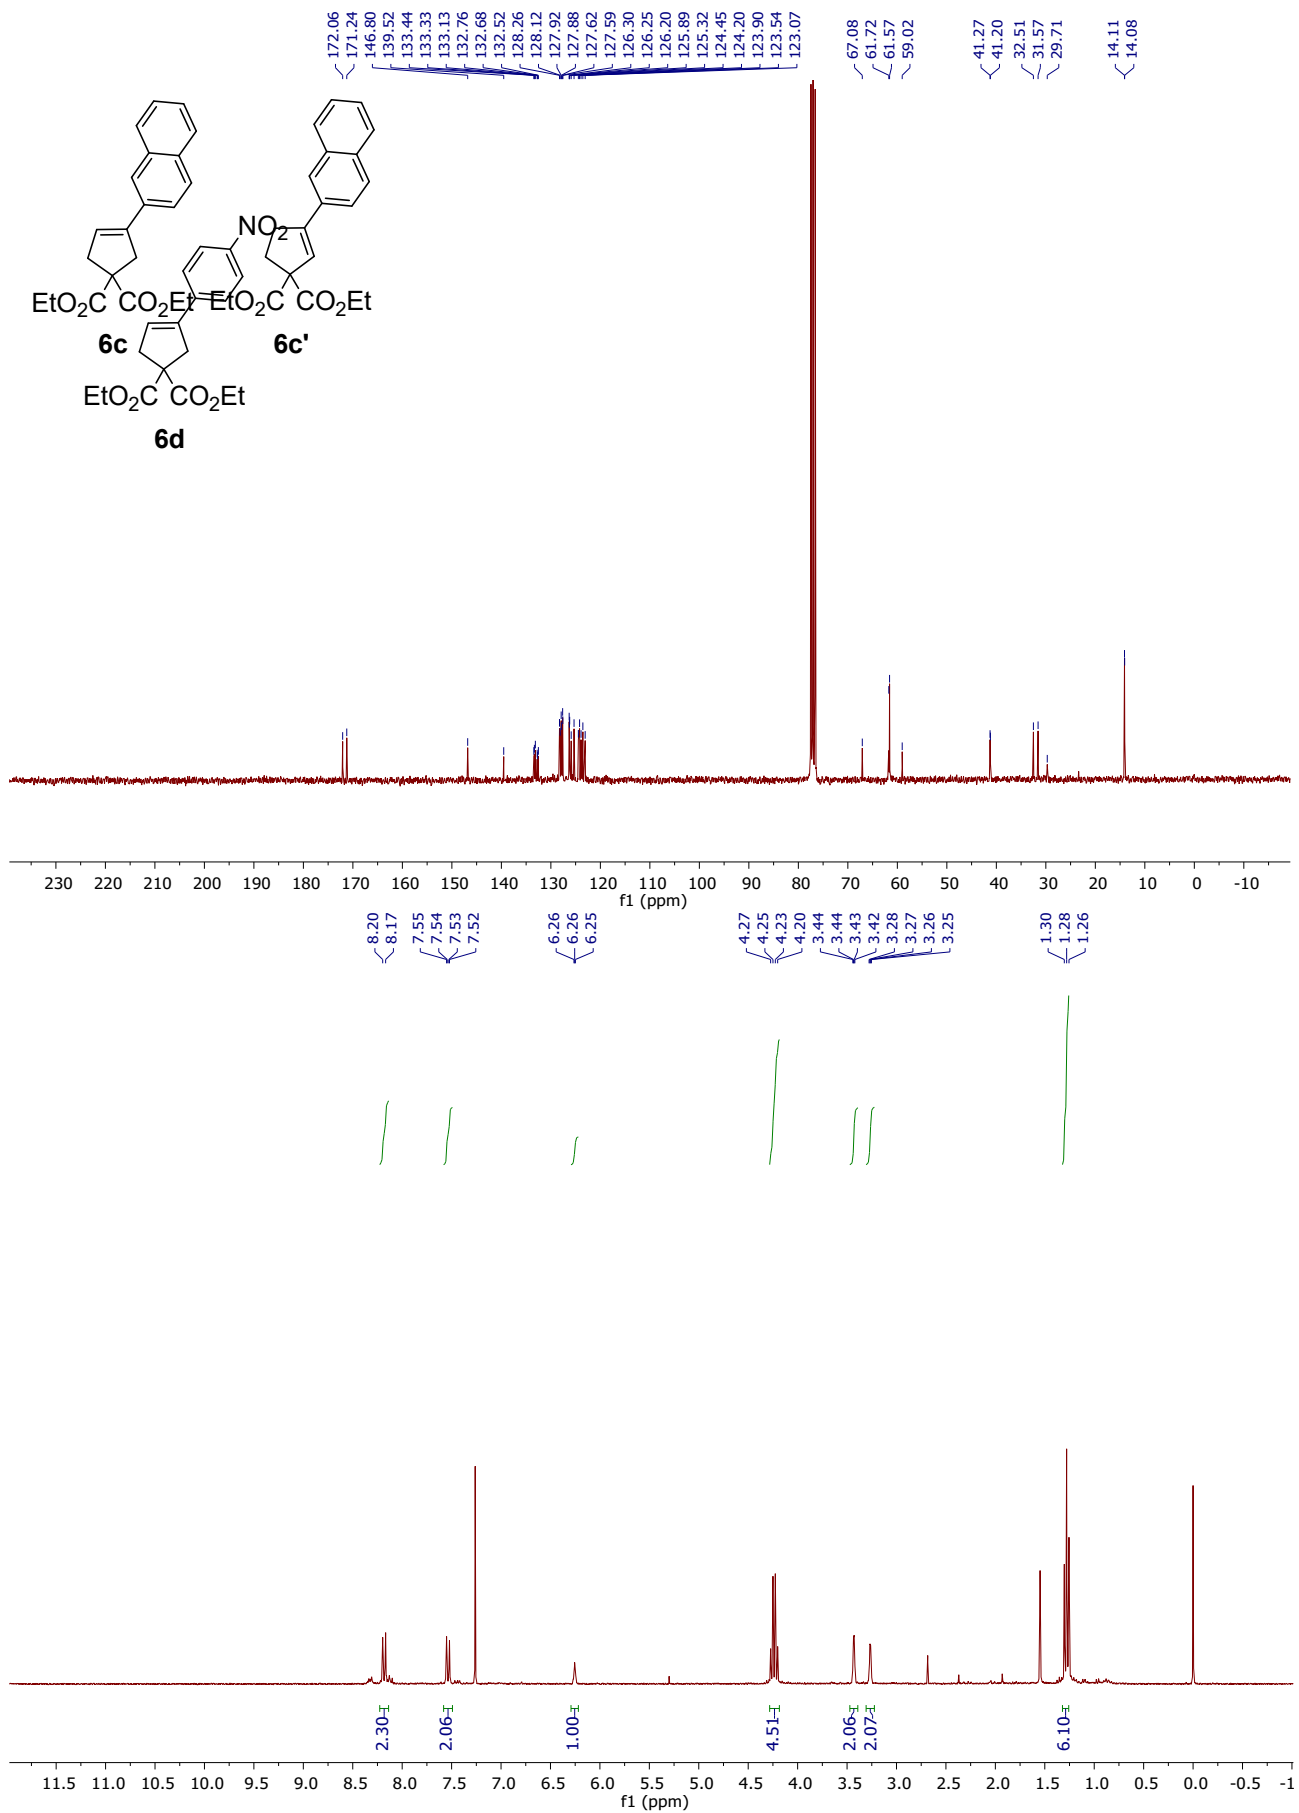

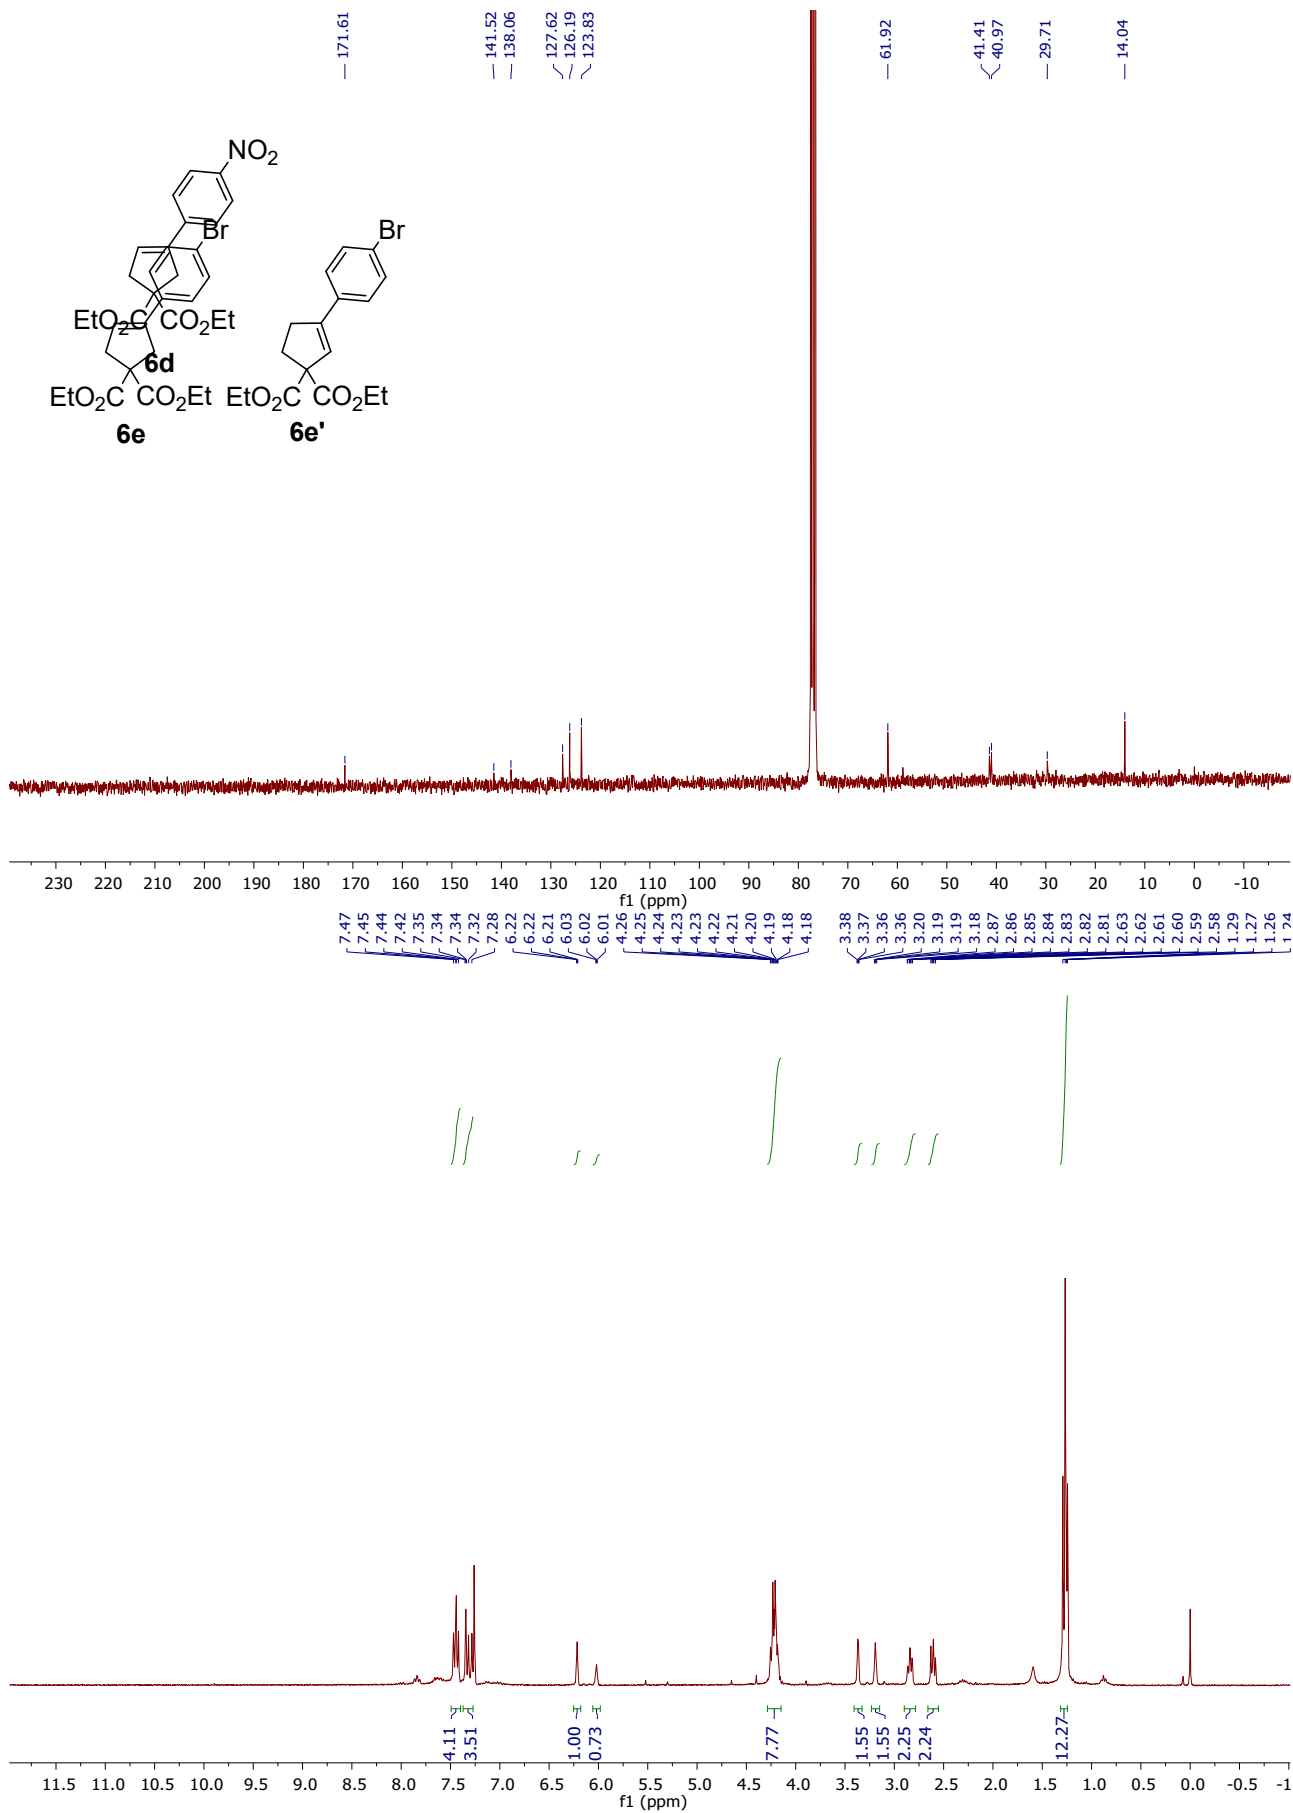

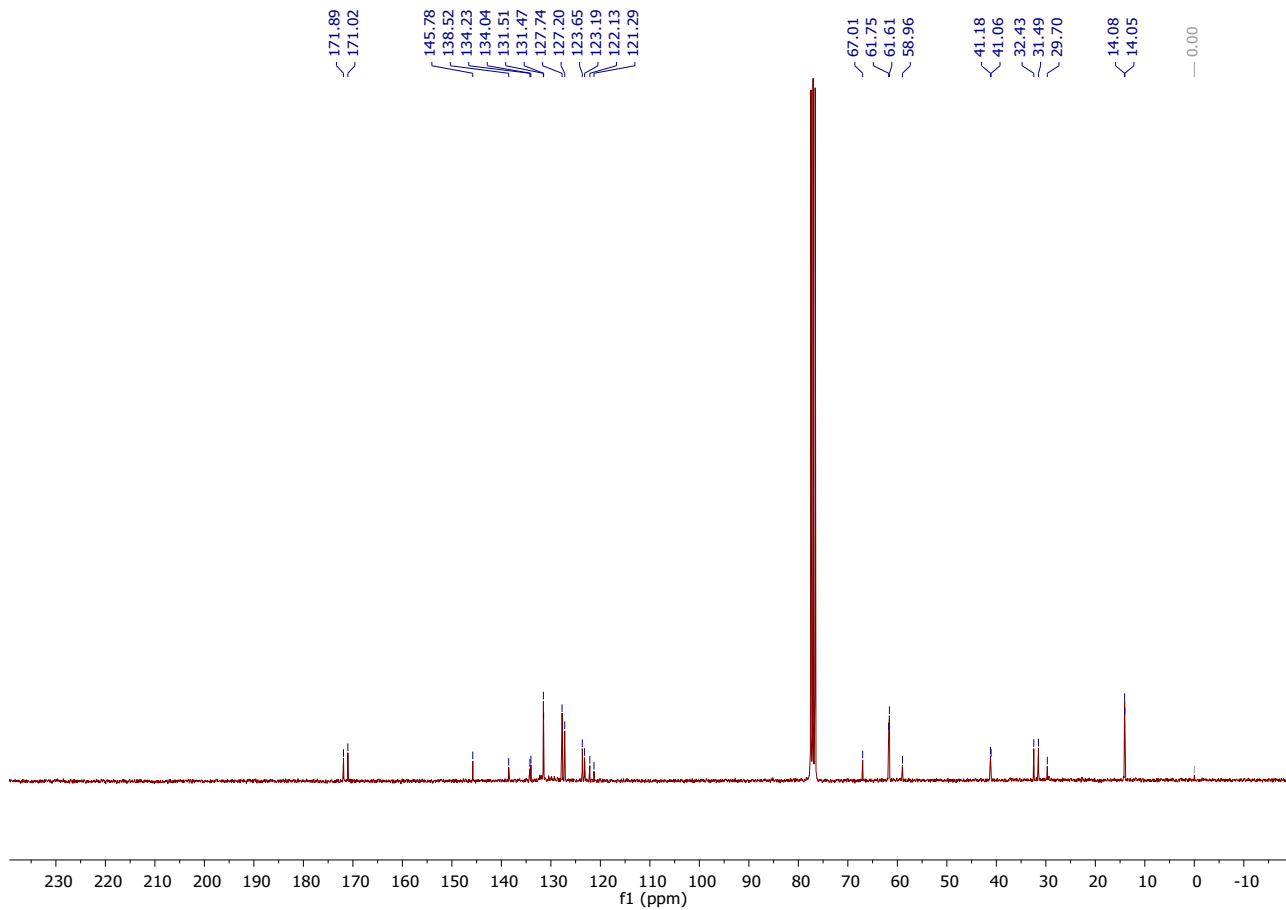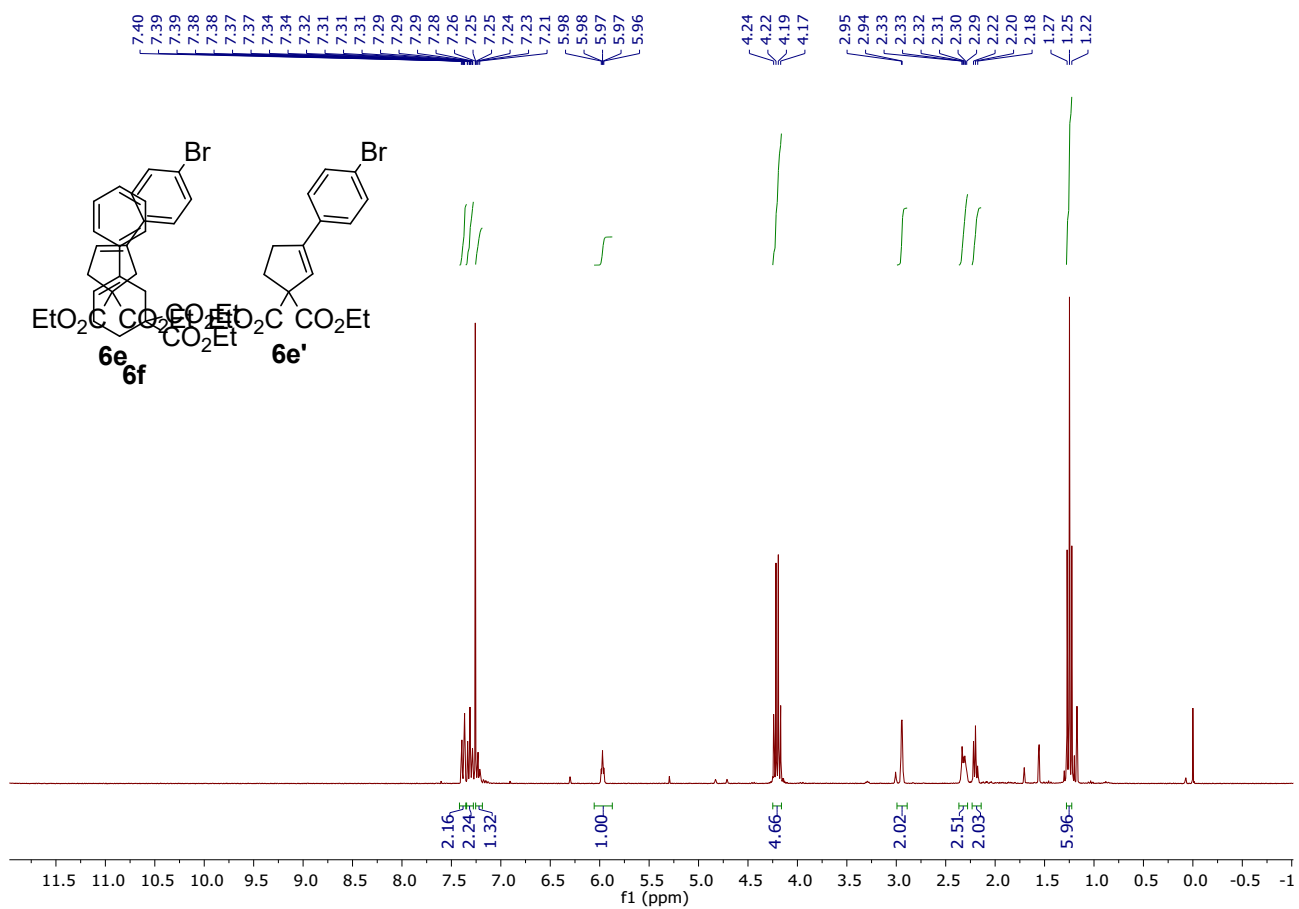

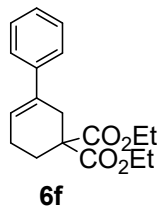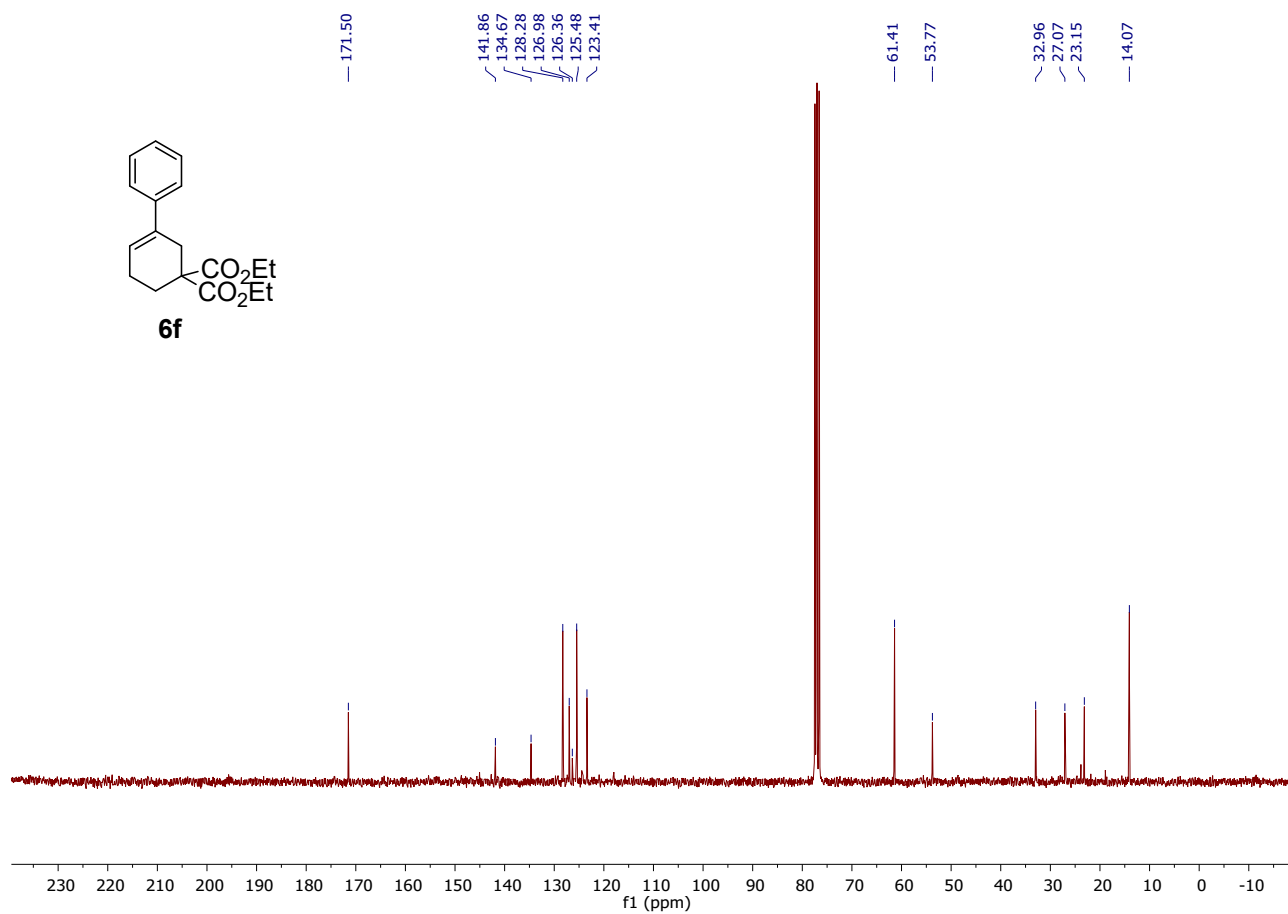

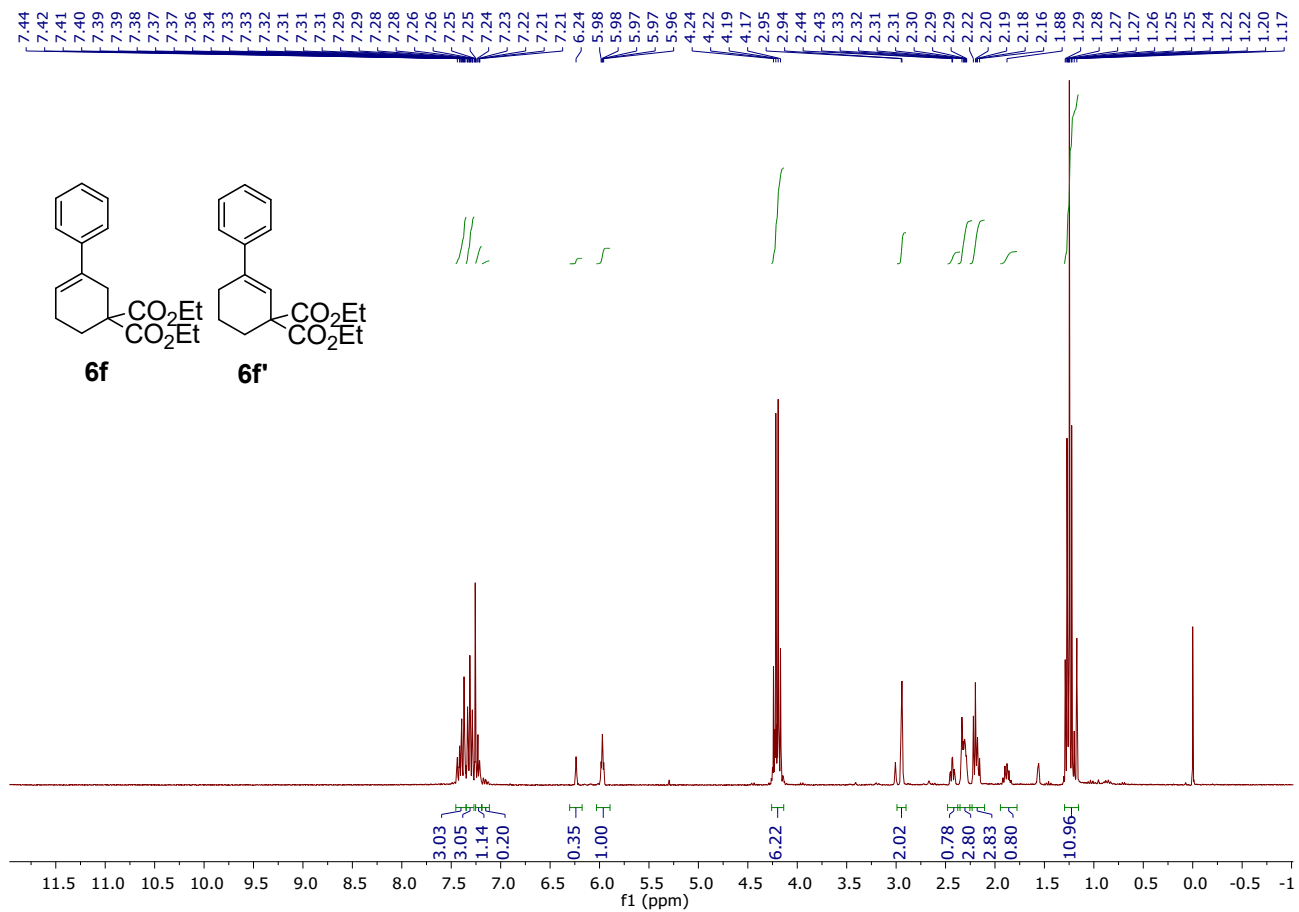



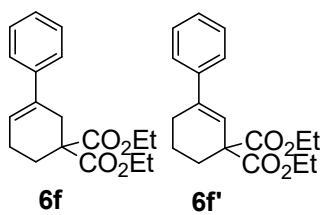

171.48  
171.15

141.84  
141.52  
140.72  
134.66  
128.27  
127.53  
126.97  
125.65  
125.46  
123.40  
121.09

61.52  
61.40  
55.44  
53.77

32.96  
28.49  
27.07  
23.83  
23.15  
20.00  
14.07

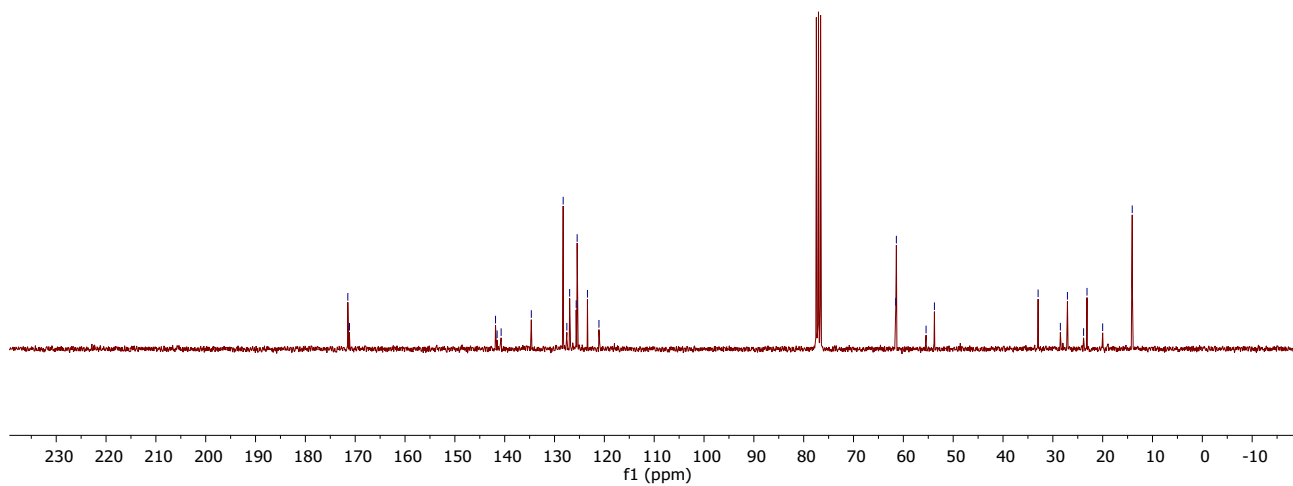

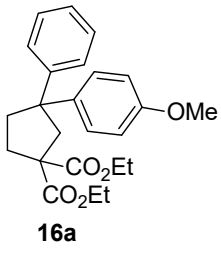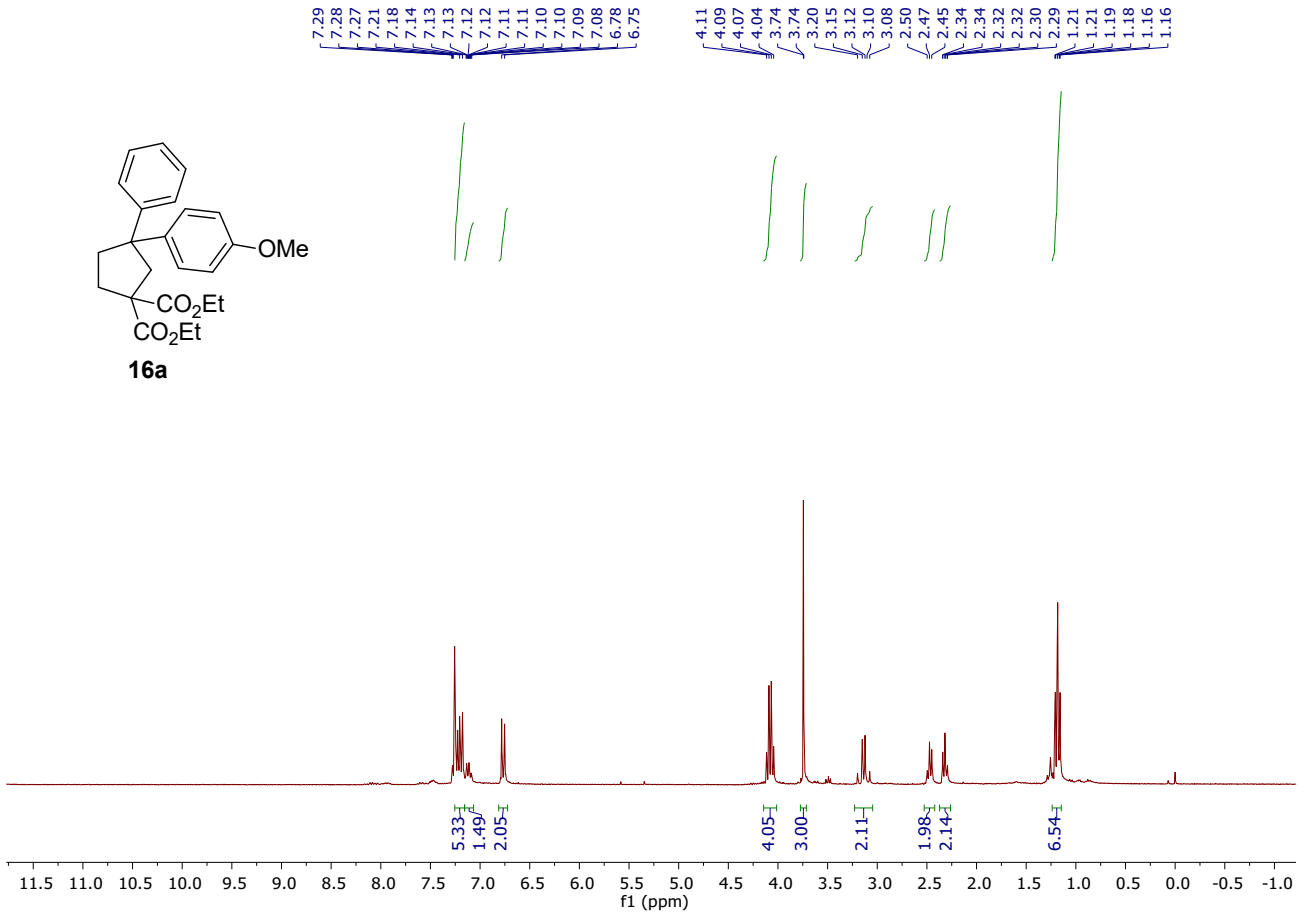

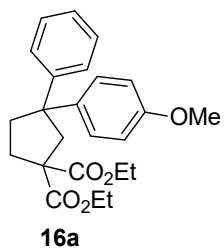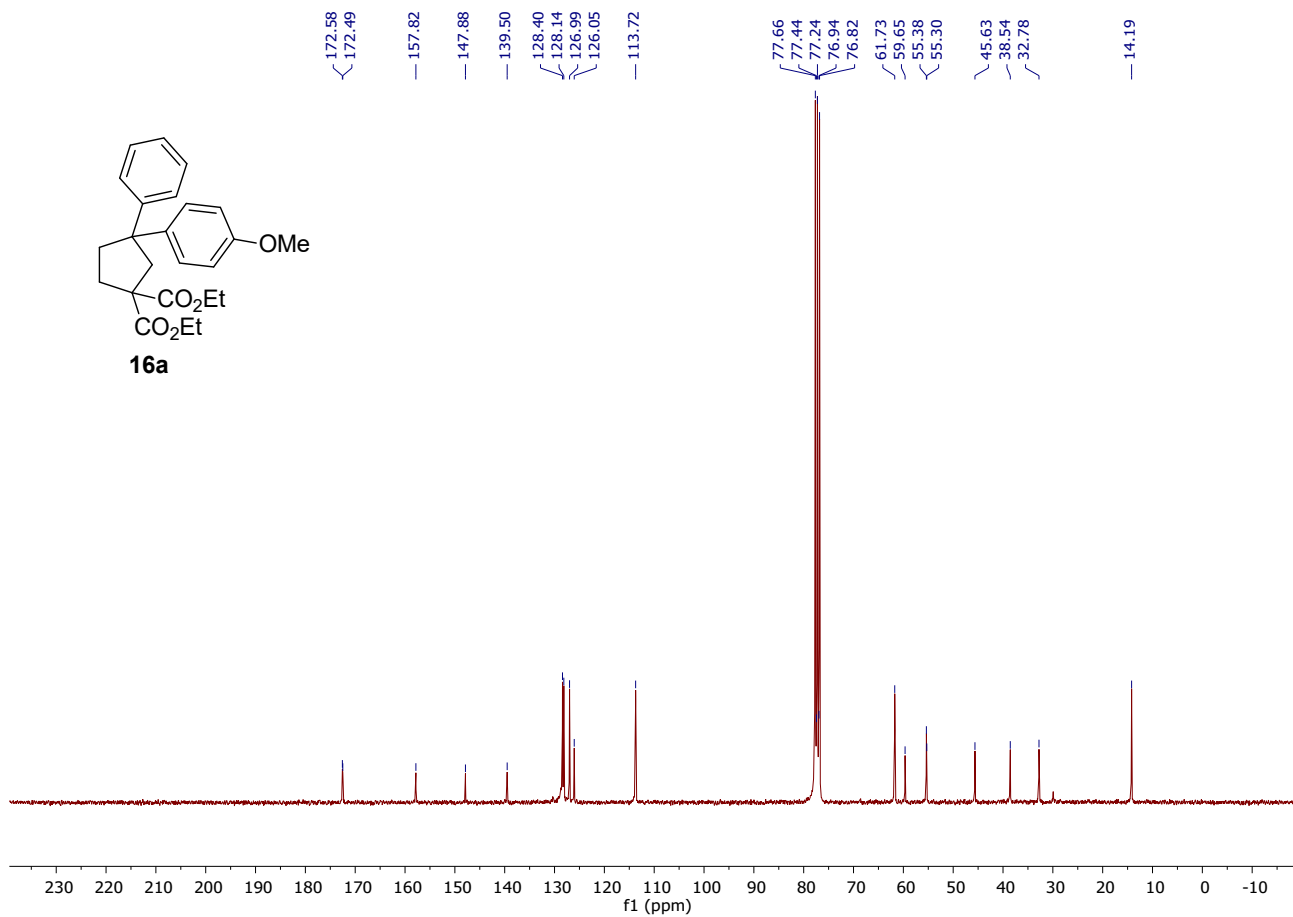

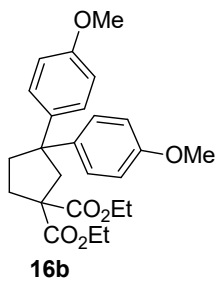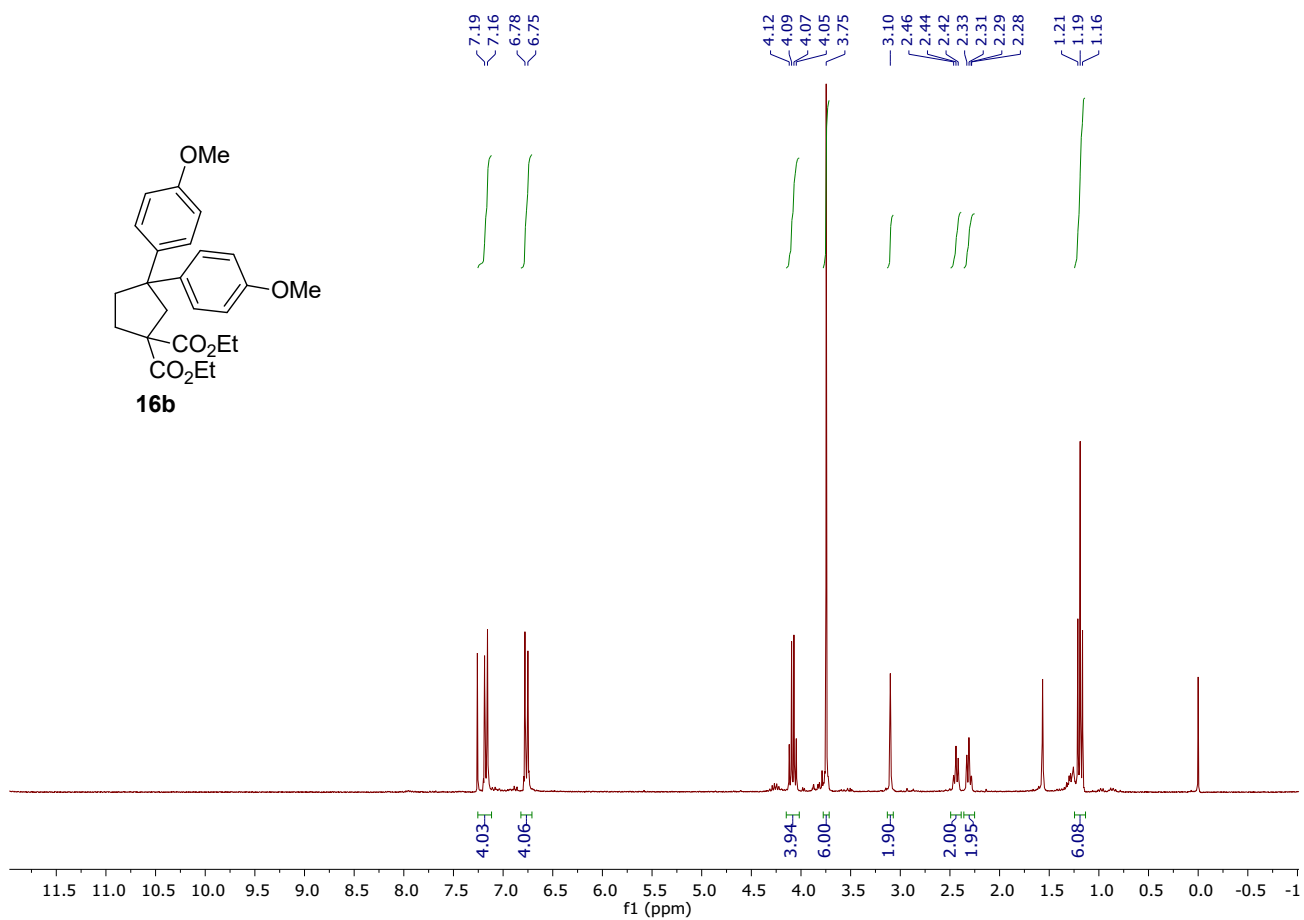

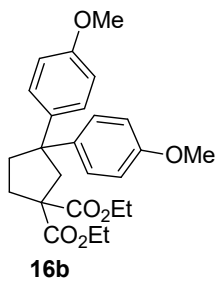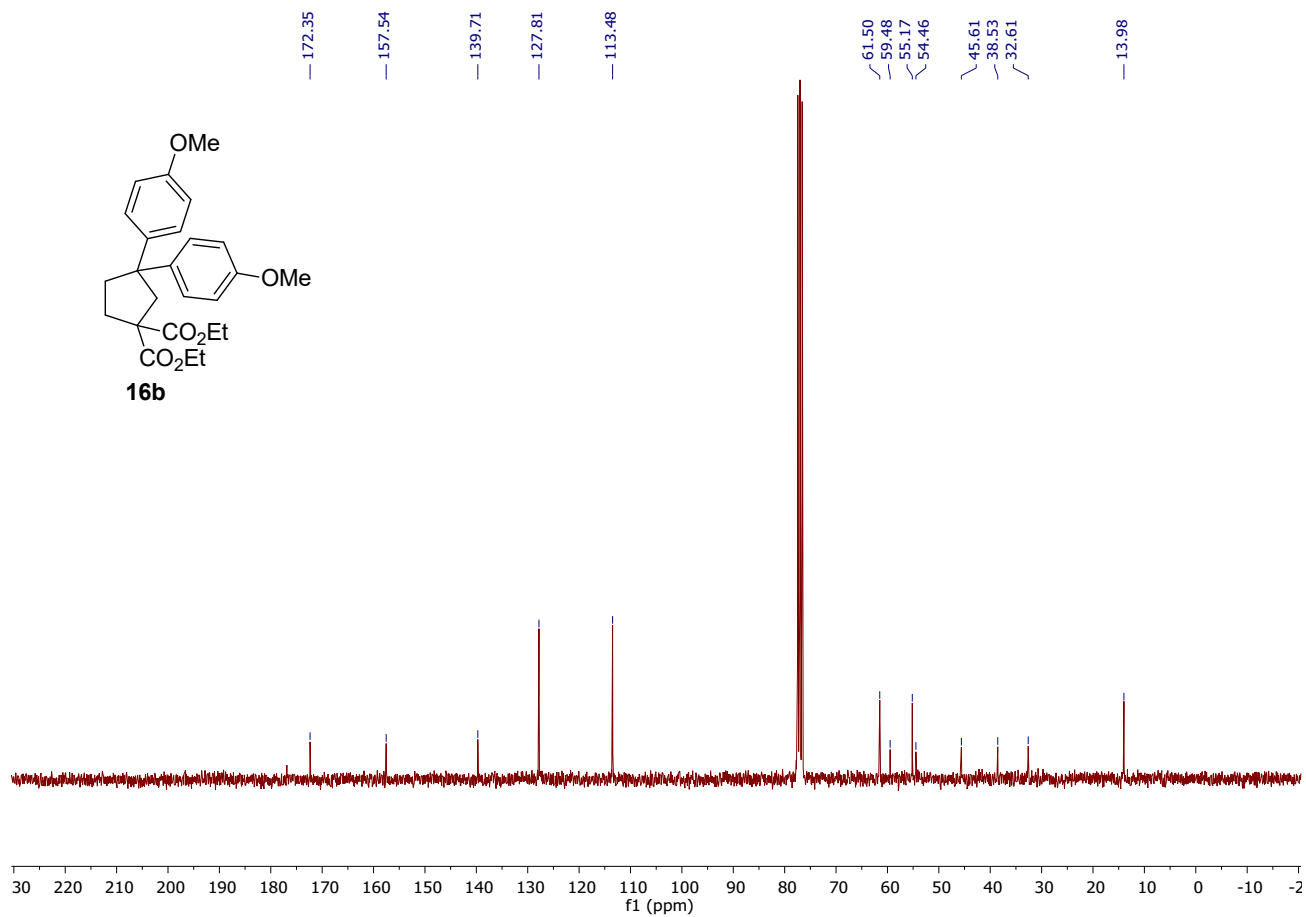

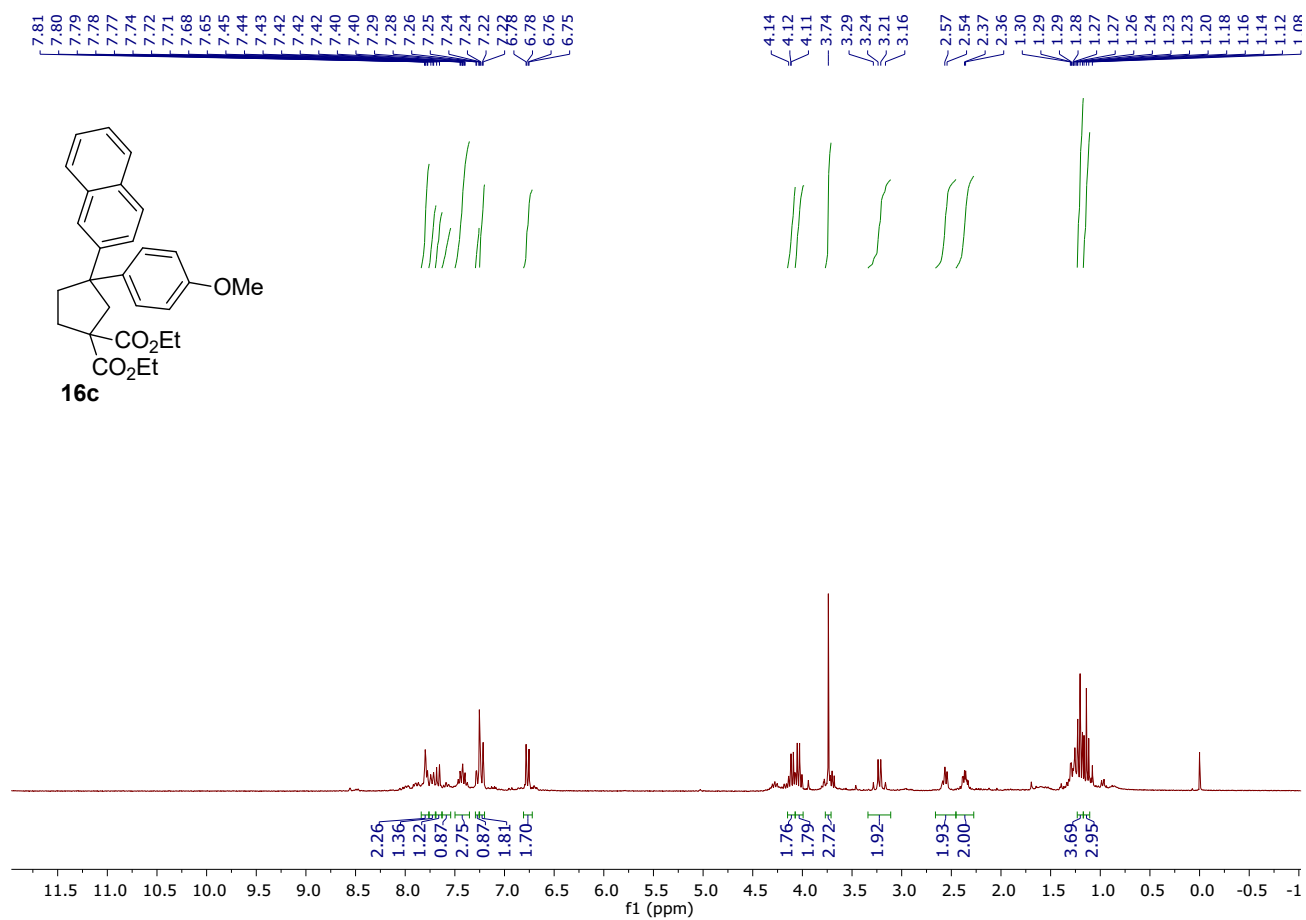

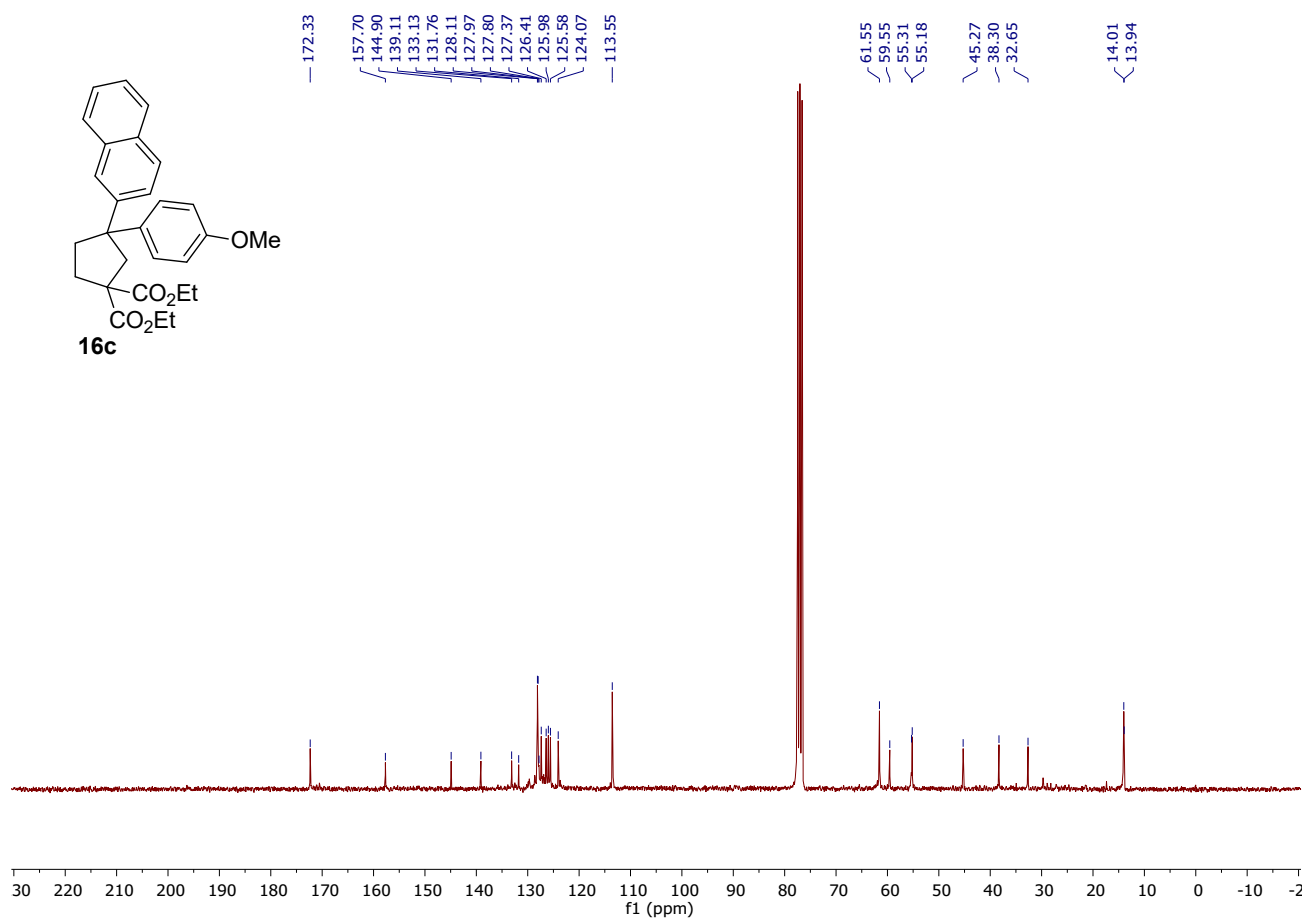

## 7. Unambiguous assignment of isomers 2 and 3 (exemplified by 2g/3g)

HMBC (Heteronuclear Multiple Bond Correlation)

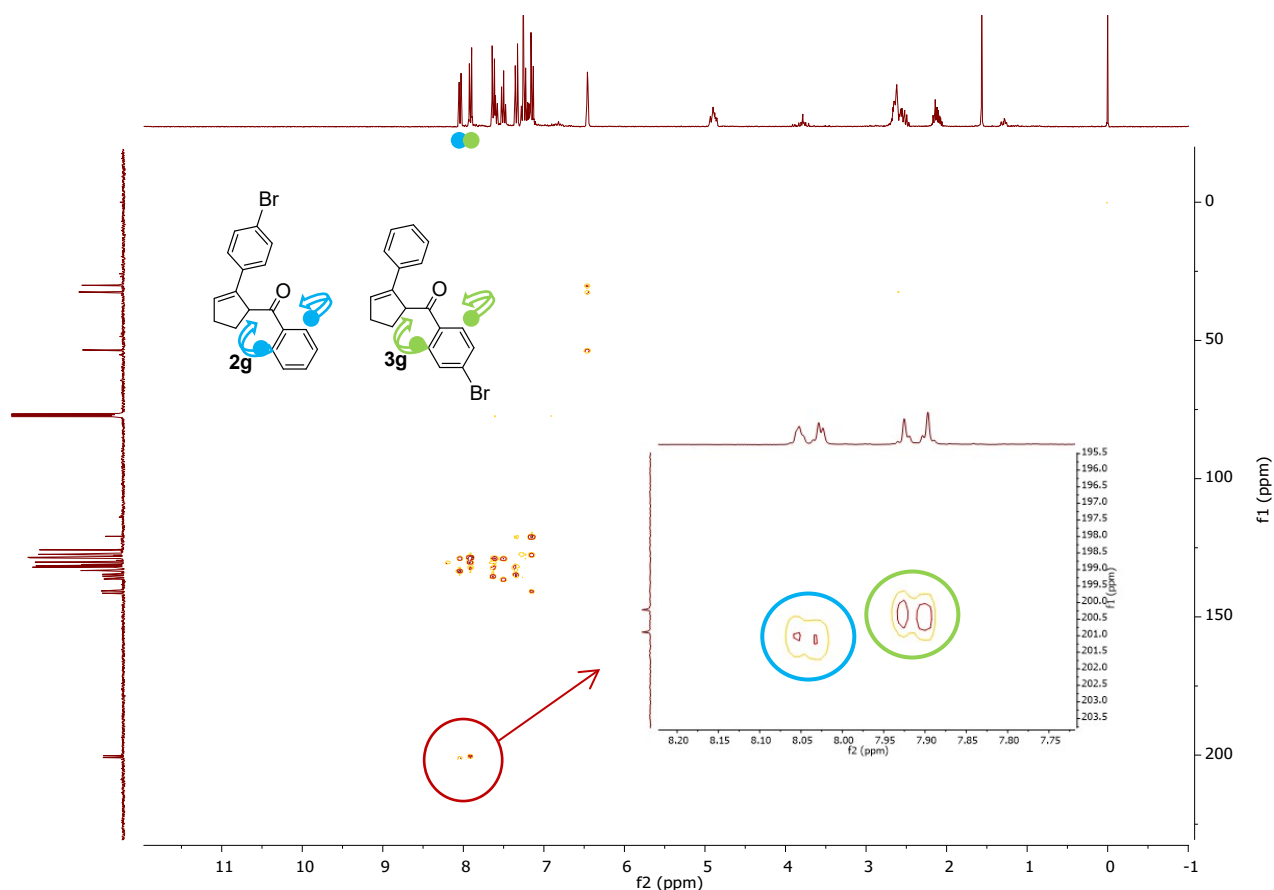

### TOCSY (Total correlation spectroscopy).

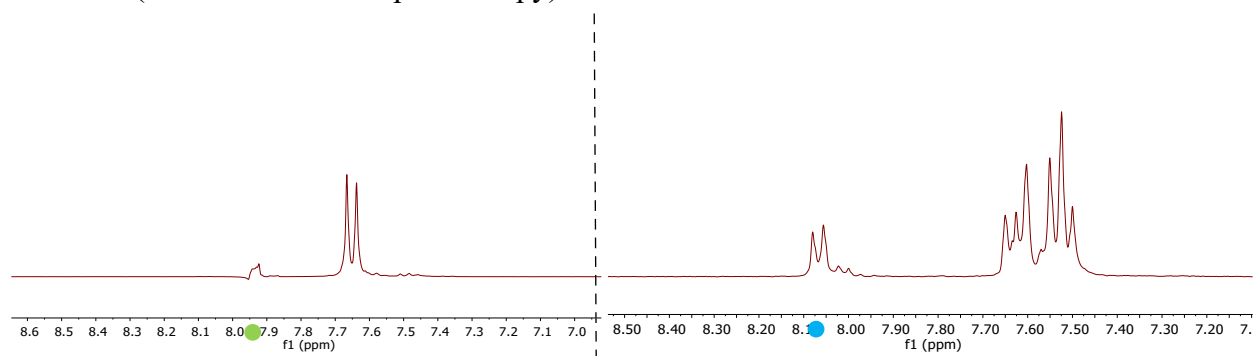

In the TOCSY spectrum (right), the signal at 7.91 ppm was irradiated, belonging to the protons represented by the green circle, which, as can be seen in the HMBC spectrum, are related to one of the carbonyl groups. These protons are only related to the signal at 7.62 ppm, indicating that they are part of a *p*-substituted aromatic ring, then this ring is one at the  $\alpha$  position to the carbonyl group (product **3g**). When the signal at 8.05 ppm was irradiated (light blue circle, left TOCSY experiment), it correlated with the signals corresponding to the protons at 7.64 ppm and 7.52 ppm, indicating that the signal belongs to an unsubstituted aromatic ring. This ring is then at the  $\alpha$  position to the carbonyl group belonging to the other compound in the mixture (product **2g**).

## 8. References

- (1) Shang, R.; Fu, Y.; Wang, Y.; Xu, Q.; Yu, H. Z.; Liu, L. Copper-Catalyzed Decarboxylase Cross-Coupling of Potassium Polyfluorobenzoates with Aryl



- Iodides and Bromides. *Angew. Chem. Int. Ed.* **2009**, *48*, 9350–9354.
- (2) He, Z.; Qi, X.; Li, S.; Zhao, Y.; Gao, G.; Lan, Y.; Wu, Y.; Lan, J.; You, J. Transition-Metal-Free Formal Decarboxylative Coupling of  $\alpha$ -Oxocarboxylates with  $\alpha$ -Bromoketones under Neutral Conditions: A Simple Access to 1,3-Diketones. *Angew. Chem. Int. Ed.* **2015**, *54*, 855–859.
  - (3) Zhu, J. L.; Tsai, Y. T. Rhodium-Catalyzed Aerobic Decomposition of 1,3-Diaryl-2-Diazo-1,3-Diketones: Mechanistic Investigation and Application to the Synthesis of Benzils. *J. Org. Chem.* **2021**, *86*, 813–828.
  - (4) Palais, L.; Alexakis, A. Copper-Catalyzed Asymmetric Conjugate Addition with Chiral SimplePhos Ligands. *Chem. Eur. J.* **2009**, *15*, 10473–10485.
  - (5) Djurovic, A.; Vayer, M.; Li, Z.; Guillot, R.; Baltaze, J. P.; Gandon, V.; Bour, C. Synthesis of Medium-Sized Carbocycles by Gallium-Catalyzed Tandem Carbonyl-Olefin Metathesis/Transfer Hydrogenation. *Org. Lett.* **2019**, *21*, 8132–8137.
  - (6) Anh To, T.; Pei, C.; Koenigs, R. M.; Vinh Nguyen, T. Hydrogen Bonding Networks Enable Brønsted Acid-Catalyzed Carbonyl-Olefin Metathesis. *Angew. Chem. Int. Ed.* **2022**, *61*, e20211736.
  - (7) Stopka, T.; Niggemann, M.; Maulide, N.  $\alpha$ -Carbonyl Cations in Sulfoxide-Driven Oxidative Cyclizations. *Angew. Chem. Int. Ed.* **2017**, *56*, 13270–13274.
  - (8) Miyahara, Y.; Ito, Y. N.  $\text{AlCl}_3$ -mediated aldol cyclocondensation of 1,6- and 1,7-diones to cyclopentene and cyclohexene derivatives. *J. Org. Chem.* **2014**, *79*, 6801–6807.
  - (9) Heppekausen, J.; Fürstner, A. Rendering Schrock-type Molybdenum Alkylidene Complexes Air Stable: User-Friendly Precatalysts for Alkene Metathesis. *Angew. Chem. Int. Ed.* **2011**, *50*, 7829–7832.
